# Supplementary material for: The [4+2] cycloaddition of donor–acceptor cyclobutanes and nitrosoarenes
Source: Royal Society of Chemistry journal article supplement (doi:10.1039/c3cc47775d), 2013-12-04

### 2,4-dibromo-1-nitrosobenzene (2f)

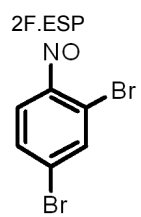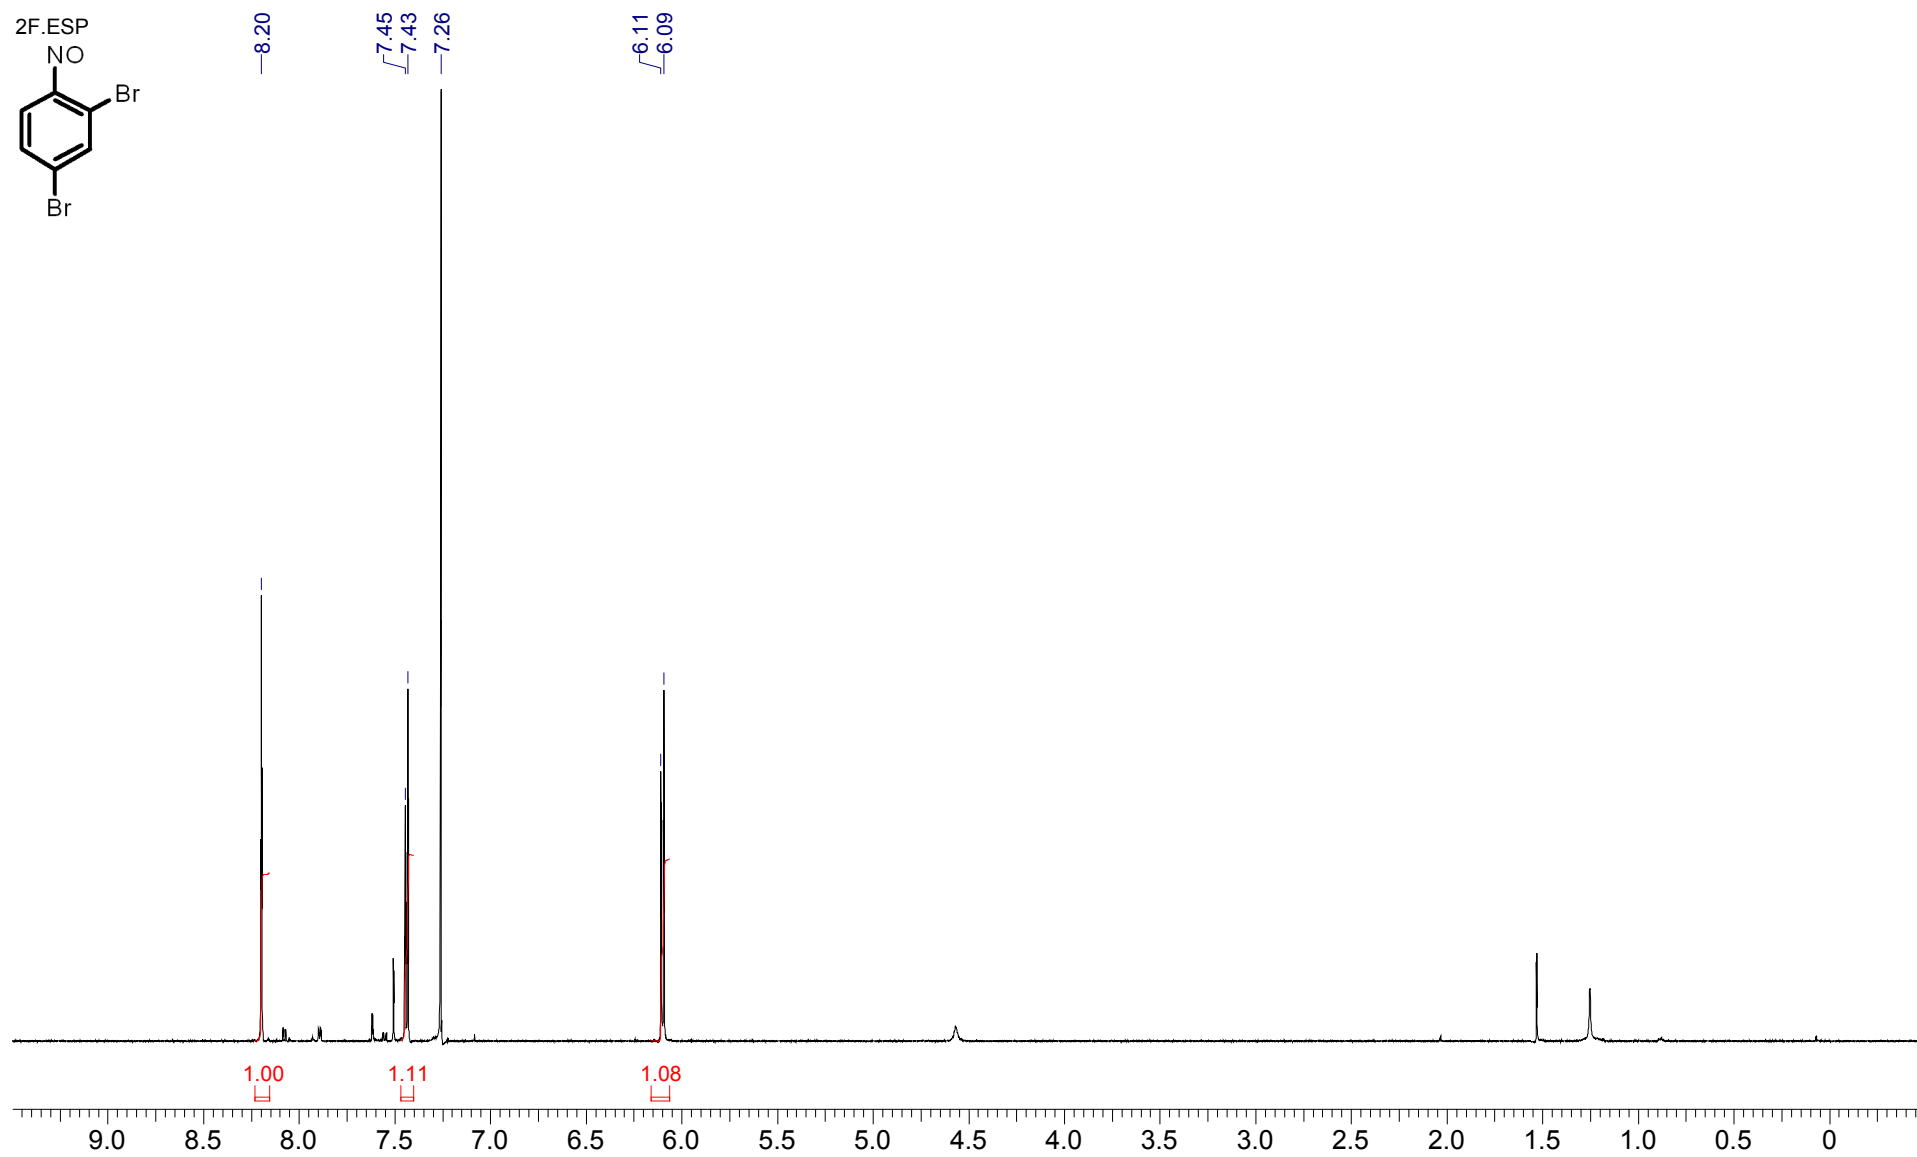

### 2,4-dibromo-1-nitrosobenzene (2f)

2F .ESP

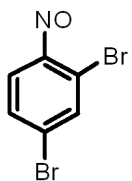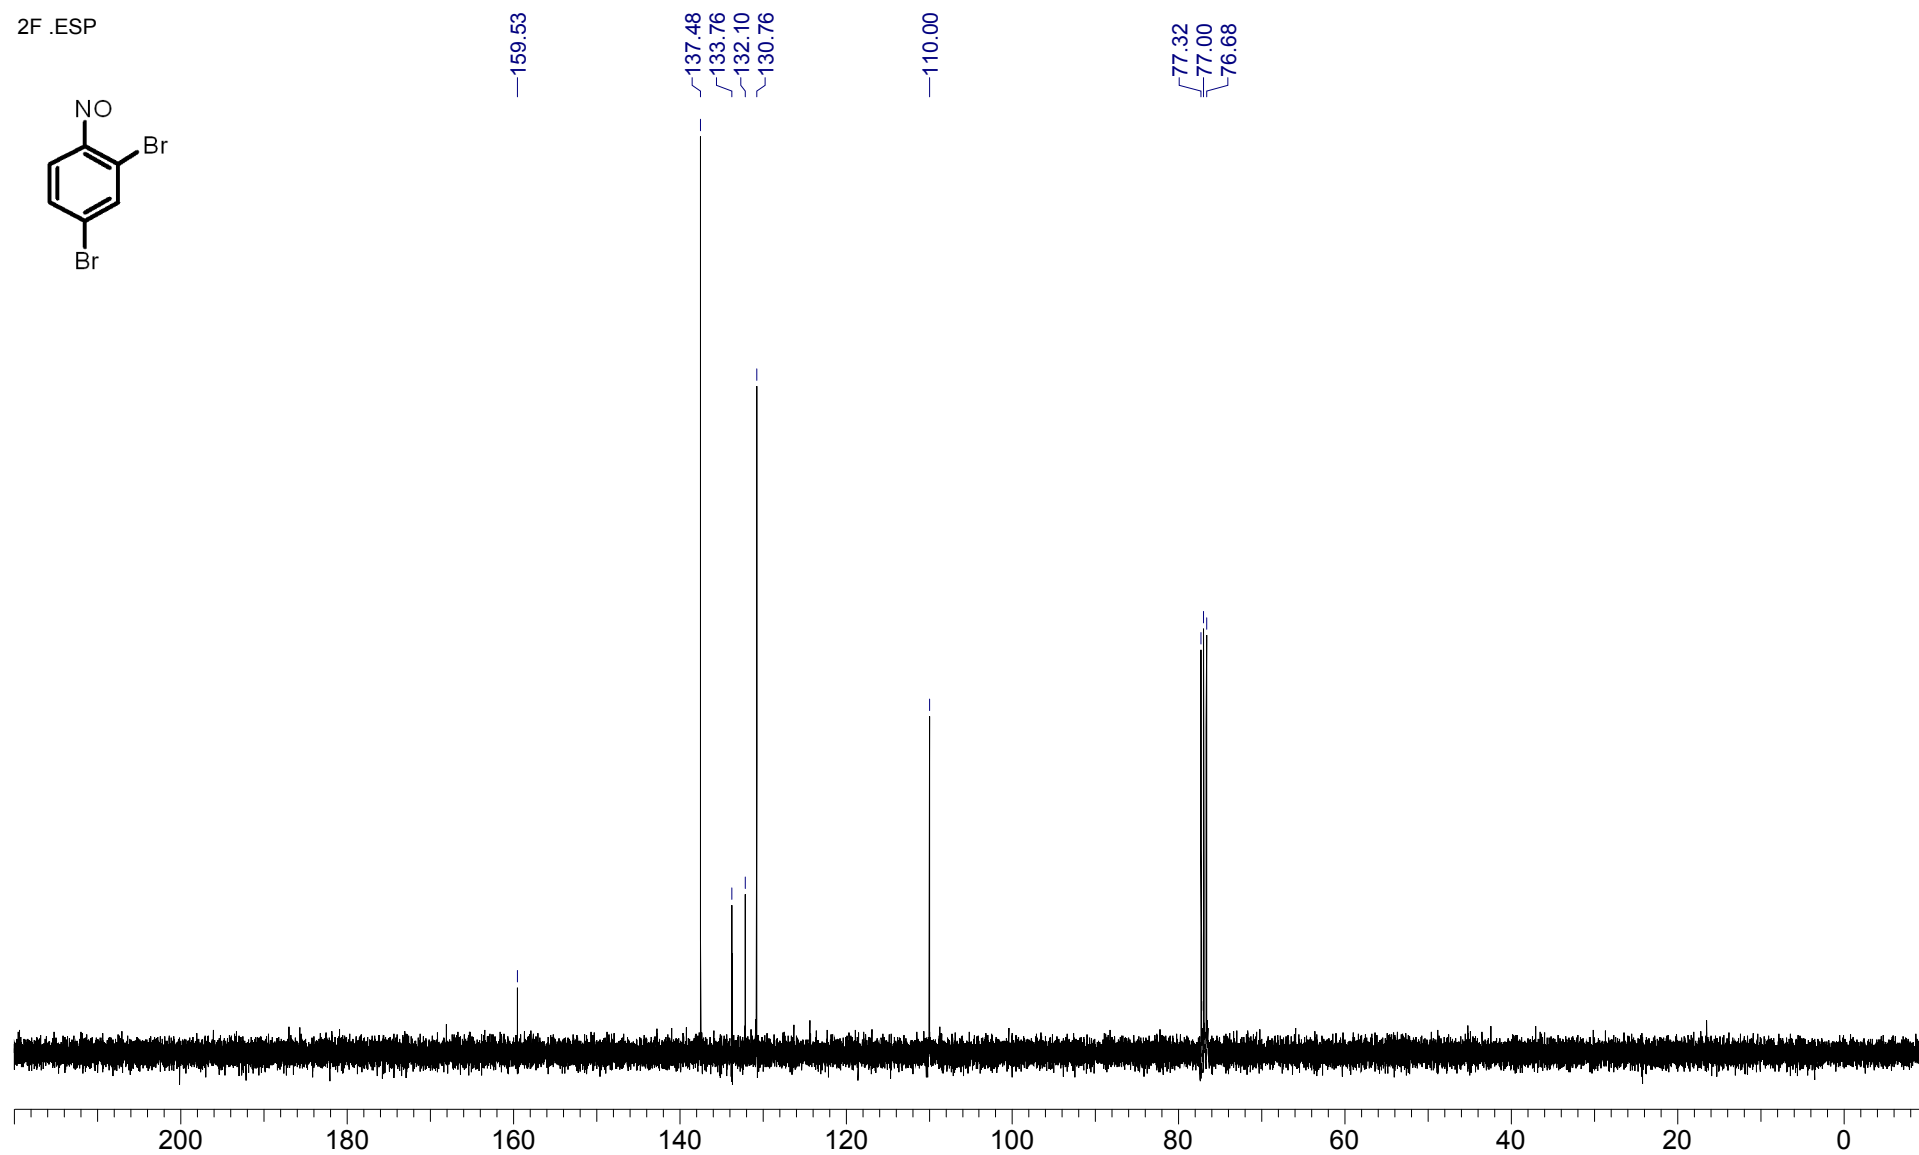

**(4a*S*\*,7a*S*\*)-diethyl 1-phenyltetrahydro-1H-furo[2,3-*c*][1,2]oxazine-3,3(7aH)-dicarboxylate (3a)**

3A.ESP

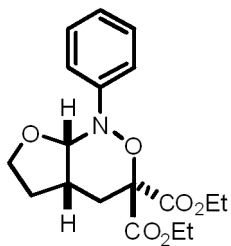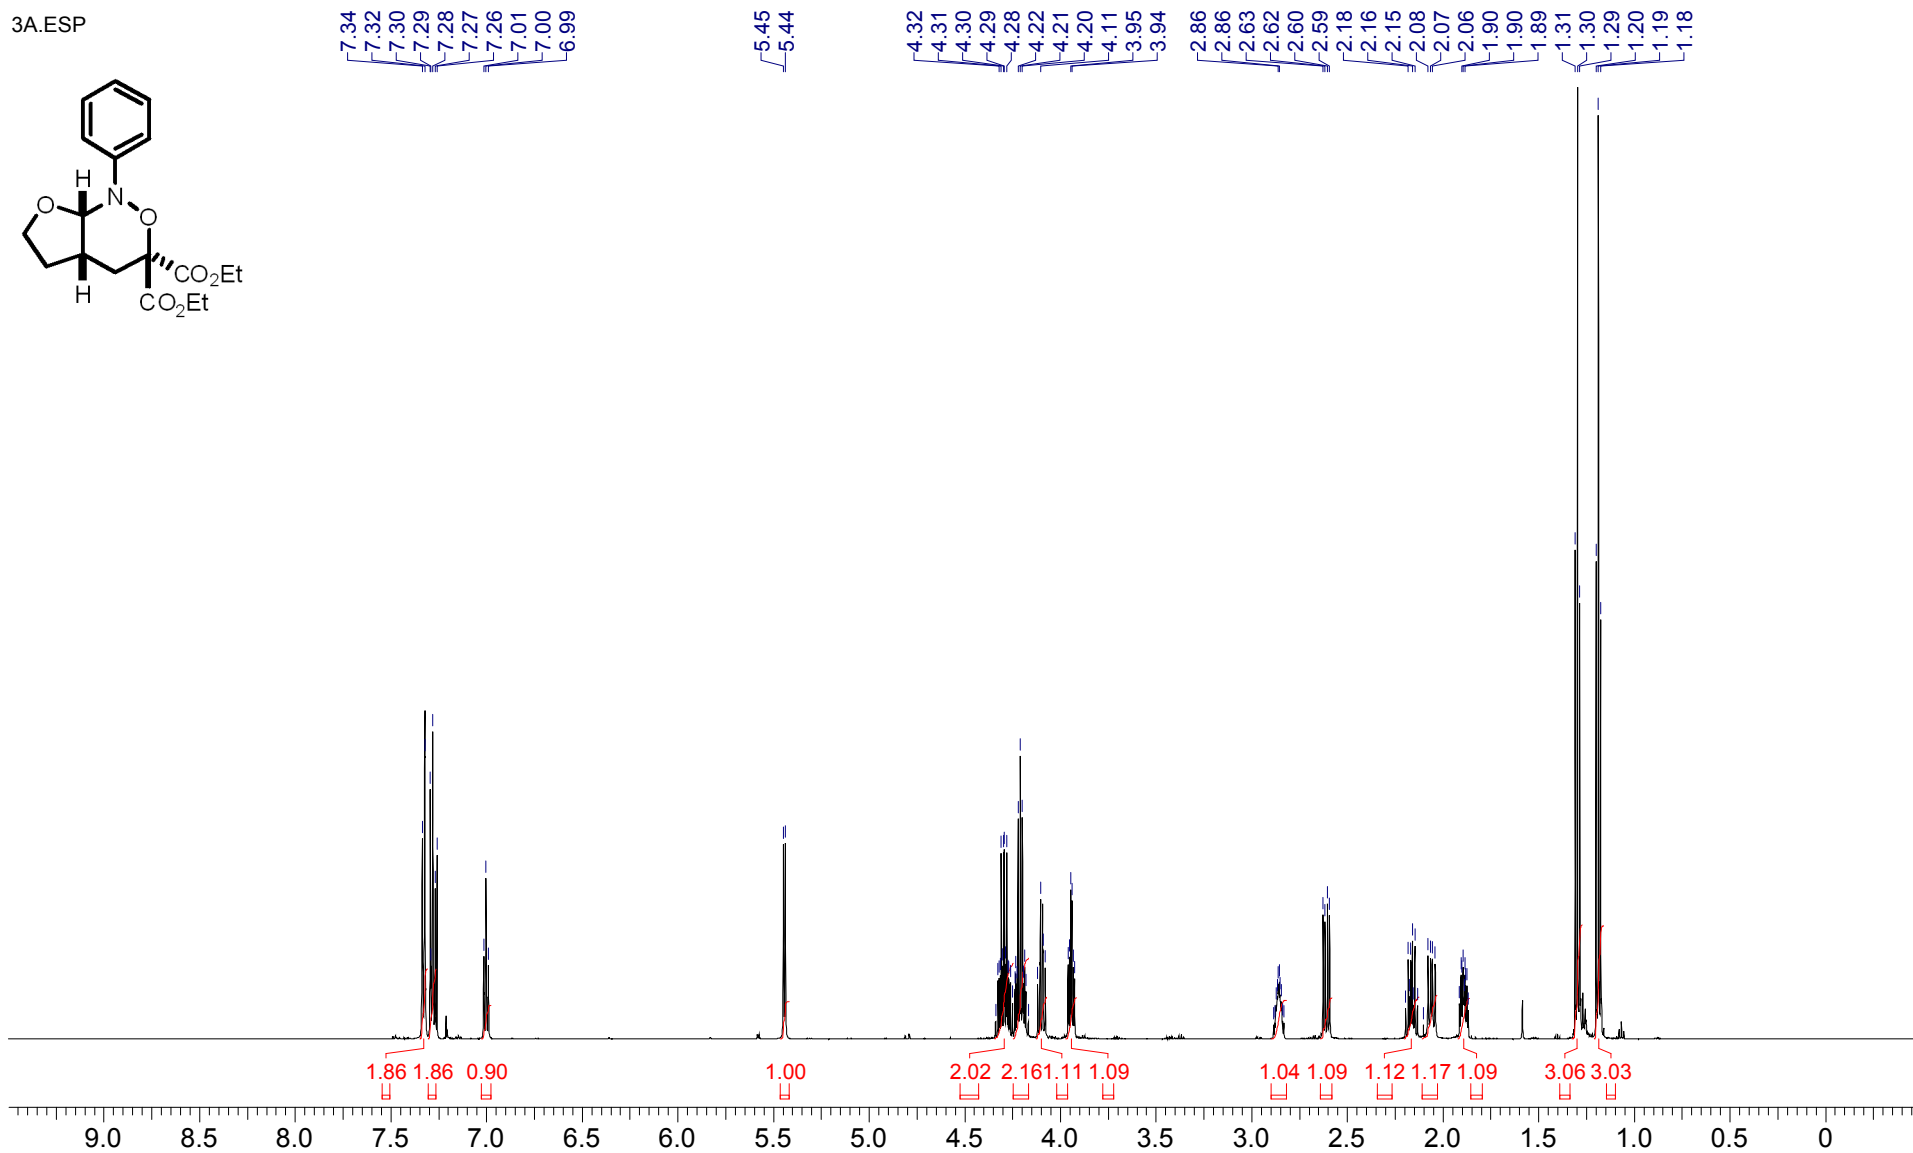

**(4a*S*\*,7a*S*\*)-diethyl 1-phenyltetrahydro-1H-furo[2,3-*c*][1,2]oxazine-3,3(7aH)-dicarboxylate (3a)**

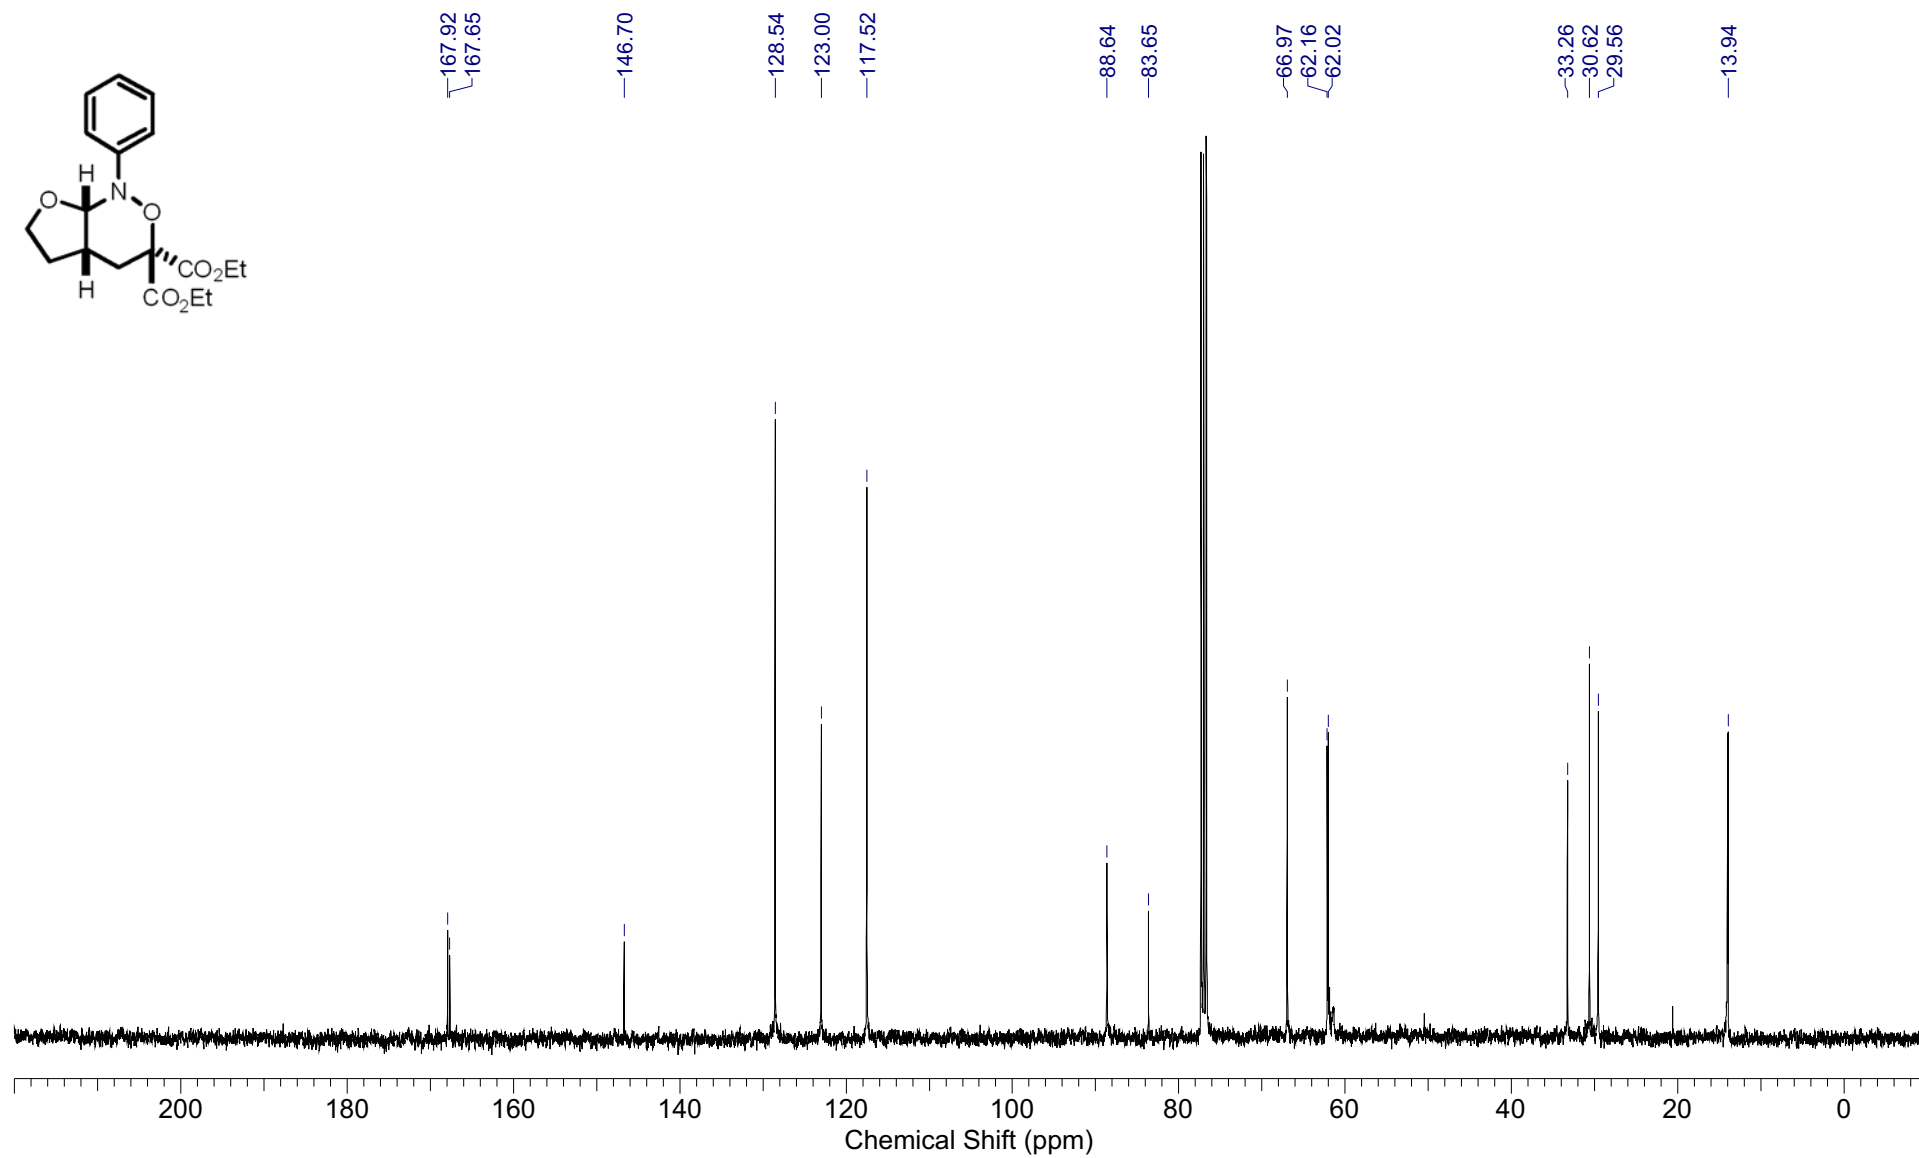

Naresh

## nOe correlations of 3a

Sample Name:  
Naresh  
Data Collected on:  
nmr-m400.chem.uwo.ca-mercury400  
Archive directory:  
/home/data/Pagenkopf/Naresh  
Sample directory:  
VN-08-16-P-2013.09.28\_01  
FidFile: NOESY\_VN-08-16-P\_01

Pulse Sequence: NOESY  
Solvent: cdcl3  
Data collected on: Sep 28 2013

Temp. 25.0 C / 298.1 K  
Sample #1, Operator: Pagenkopf

Relax. delay 1.000 sec  
Acq. time 0.150 sec  
Width 4382.1 Hz  
2D Width 4382.1 Hz  
16 repetitions  
2 x 200 increments  
OBSERVE H1, 400.0802686 MHz  
DATA PROCESSING  
Gauss apodization 0.069 sec  
F1 DATA PROCESSING  
Gauss apodization 0.042 sec  
FT size 2048 x 2048  
Total time 2 hr, 33 min

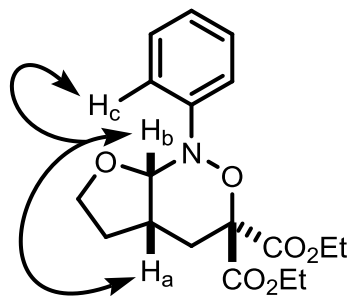

3a

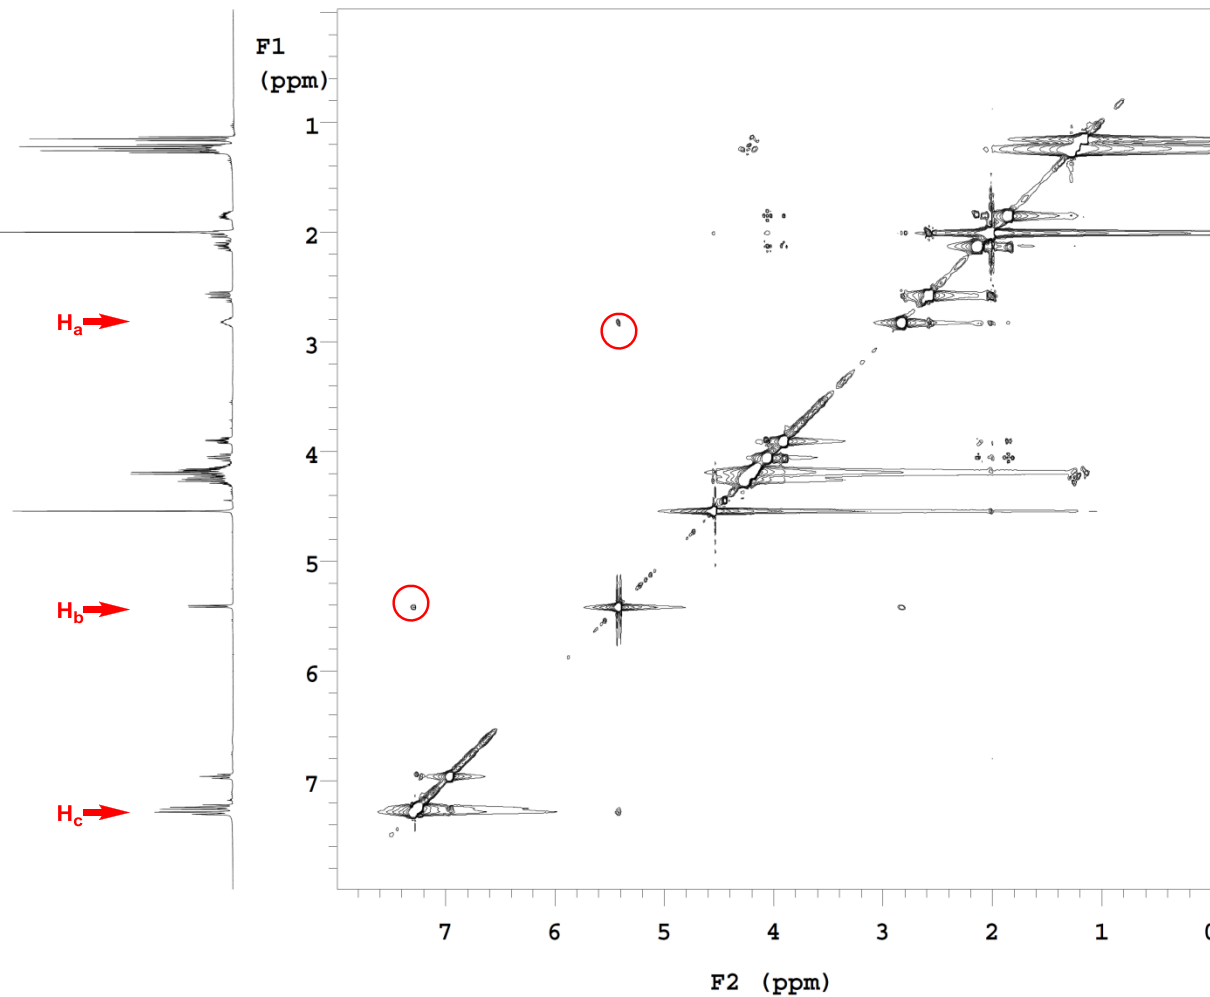

**(4a*S*\*,7a*S*\*)-diethyl 1-(4-bromophenyl)tetrahydro-1H-furo[2,3-c][1,2]oxazine-3,3(7aH)-dicarboxylate (3b)**

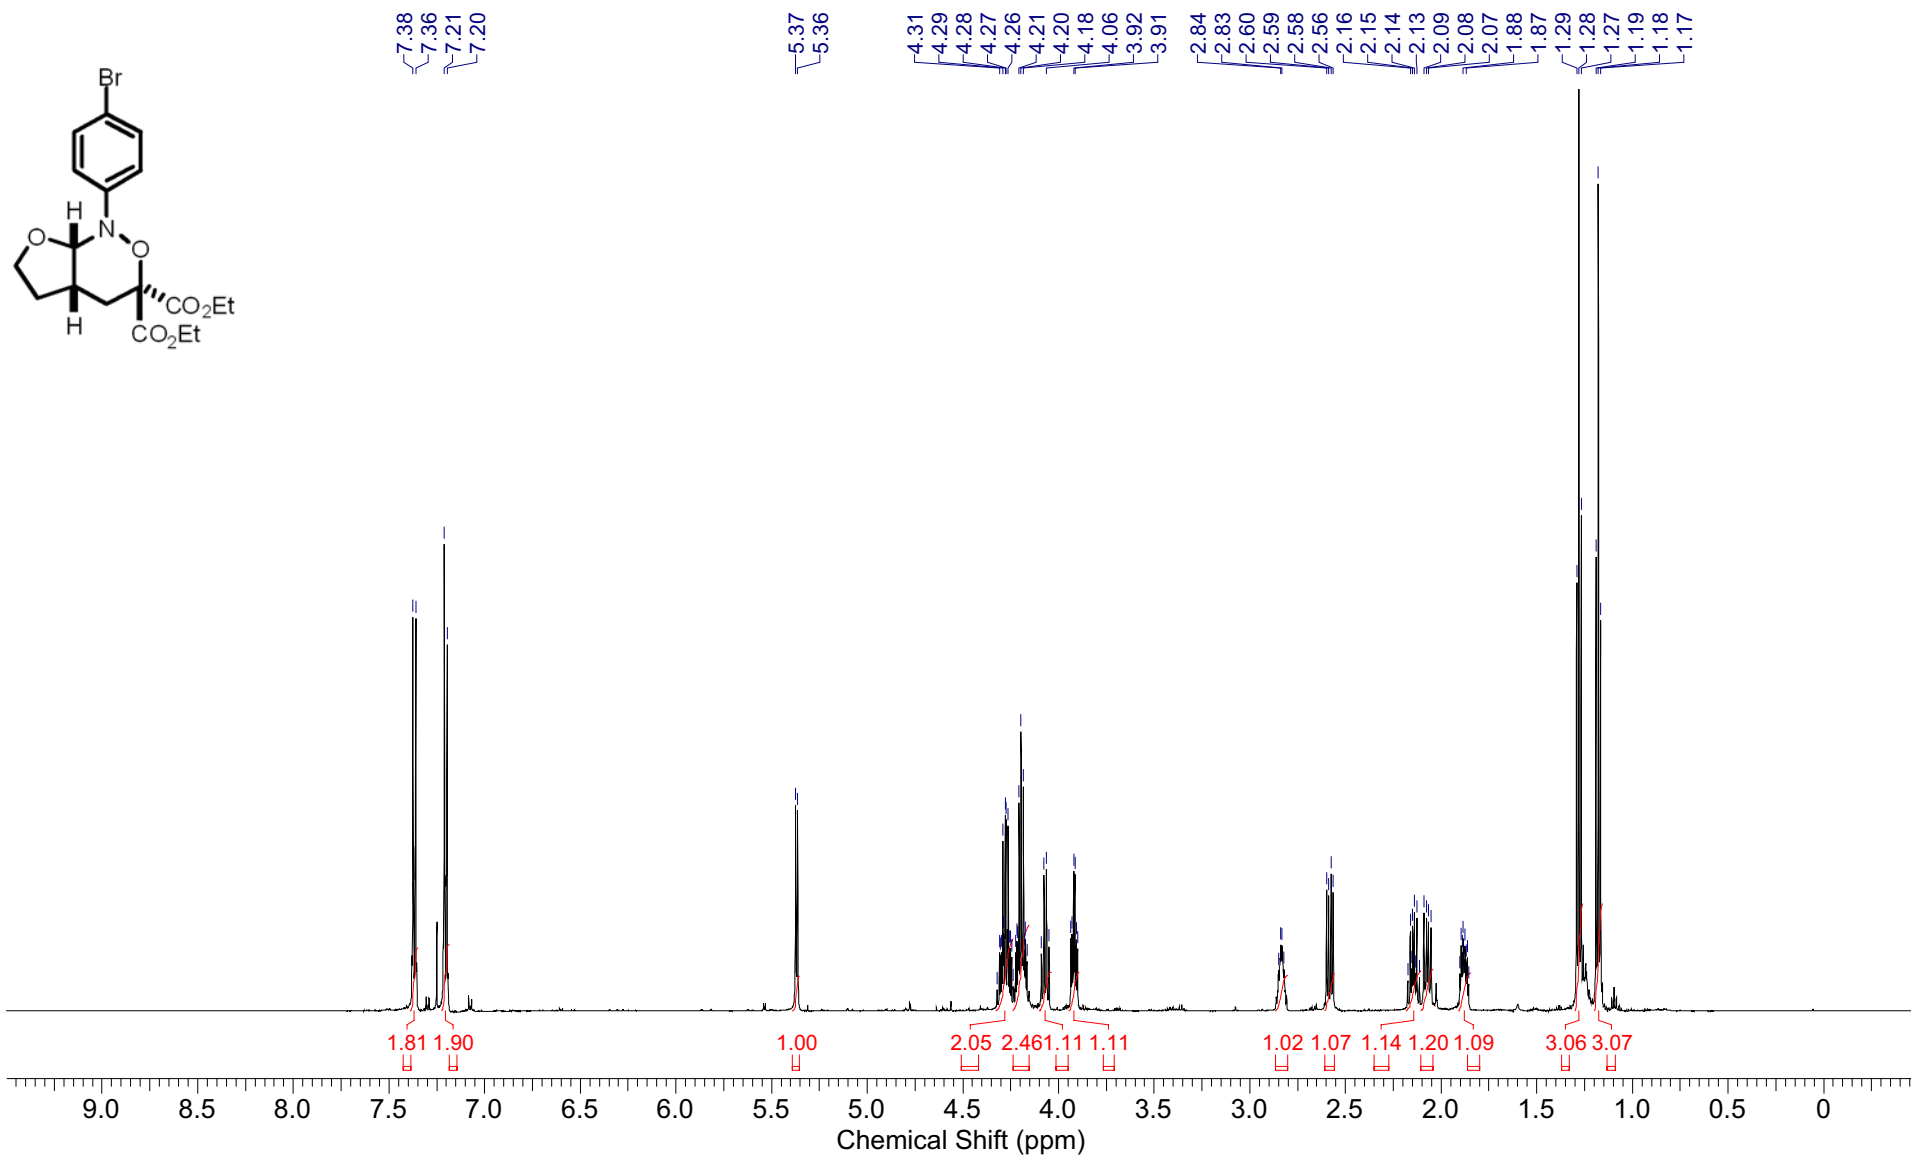

**(4a*S*\*,7a*S*\*)-diethyl 1-(4-bromophenyl)tetrahydro-1H-furo[2,3-c][1,2]oxazine-3,3(7aH)-dicarboxylate (3b)**

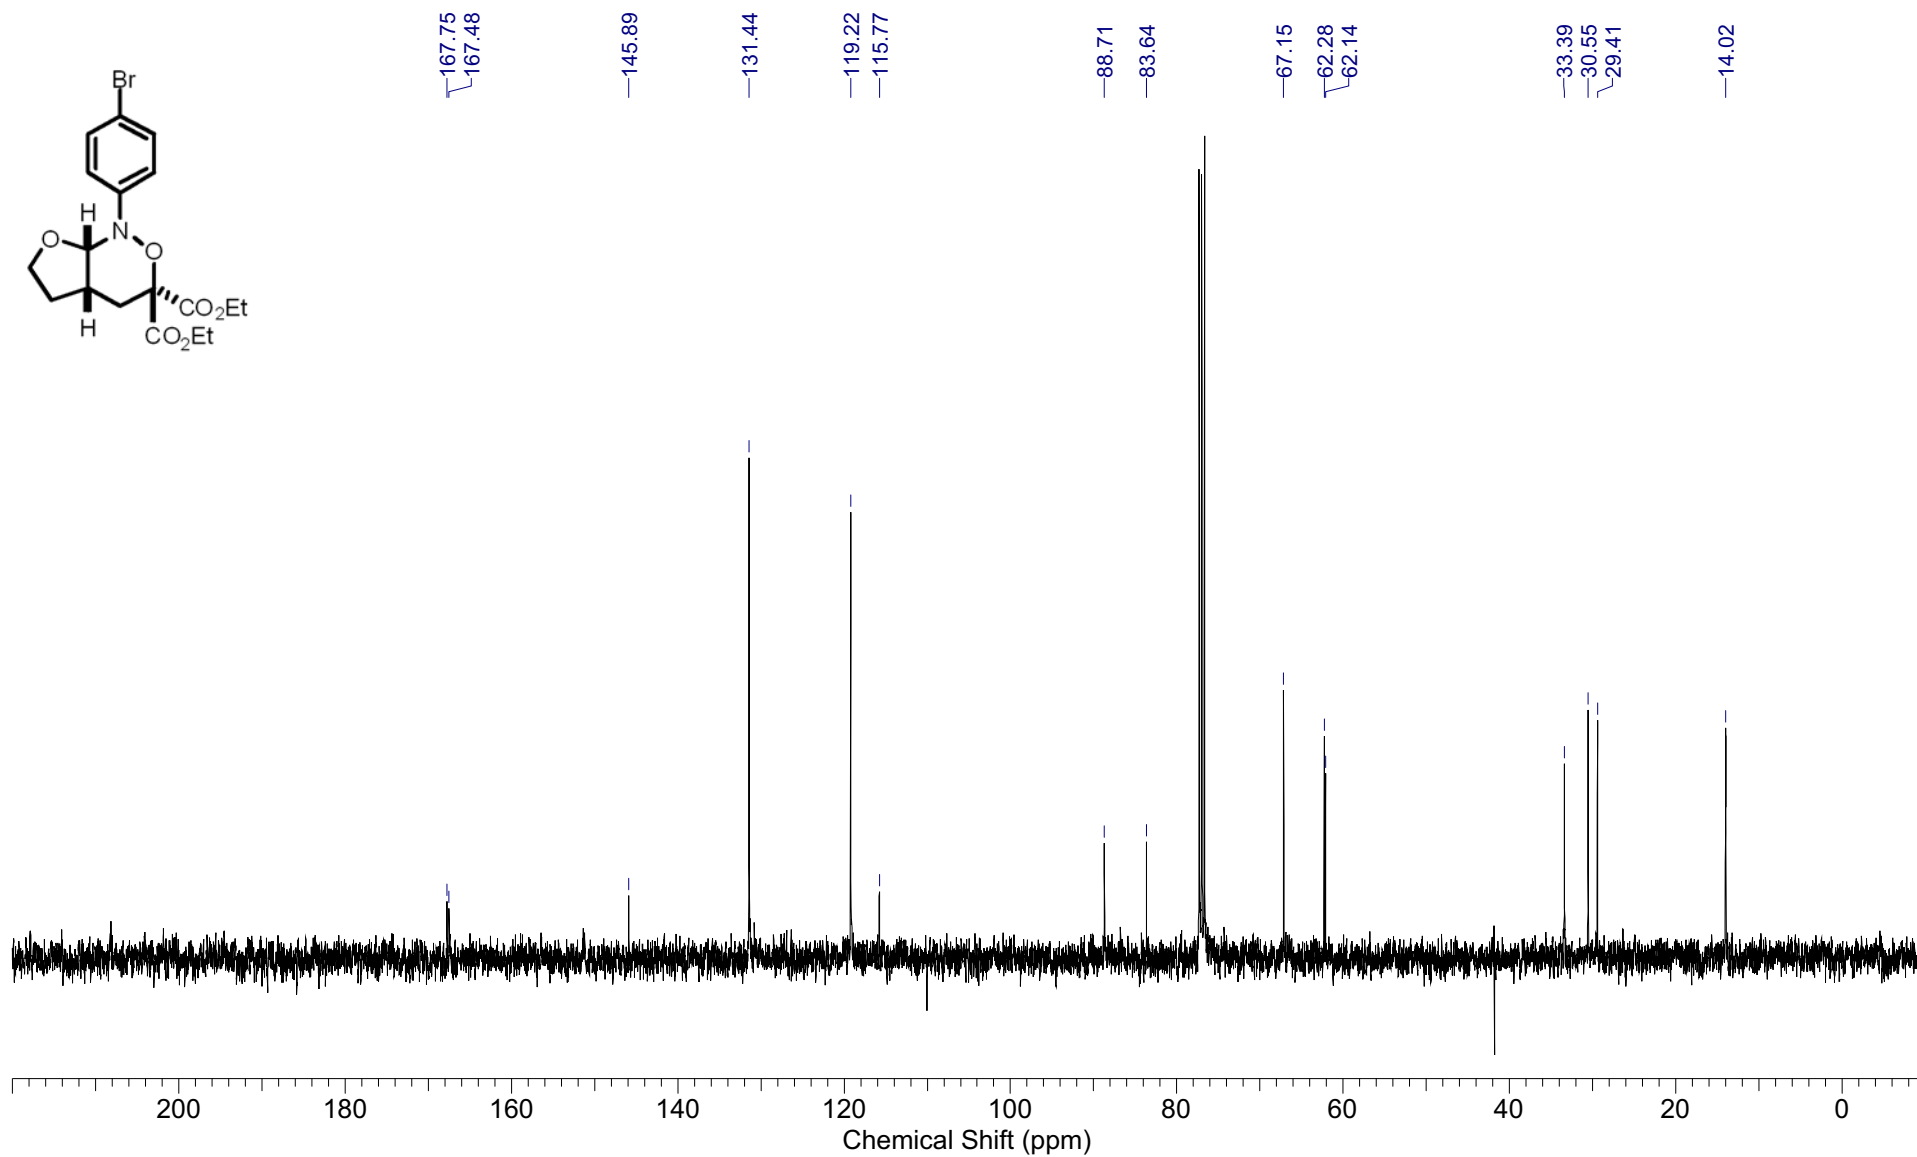

**(4a*R*\*,7a*R*\*)-diethyl 1-(4-bromophenyl)tetrahydro-1*H*-furo[2,3-*c*][1,2]oxazine-3,3(7a*H*)-dicarboxylate (3b)**

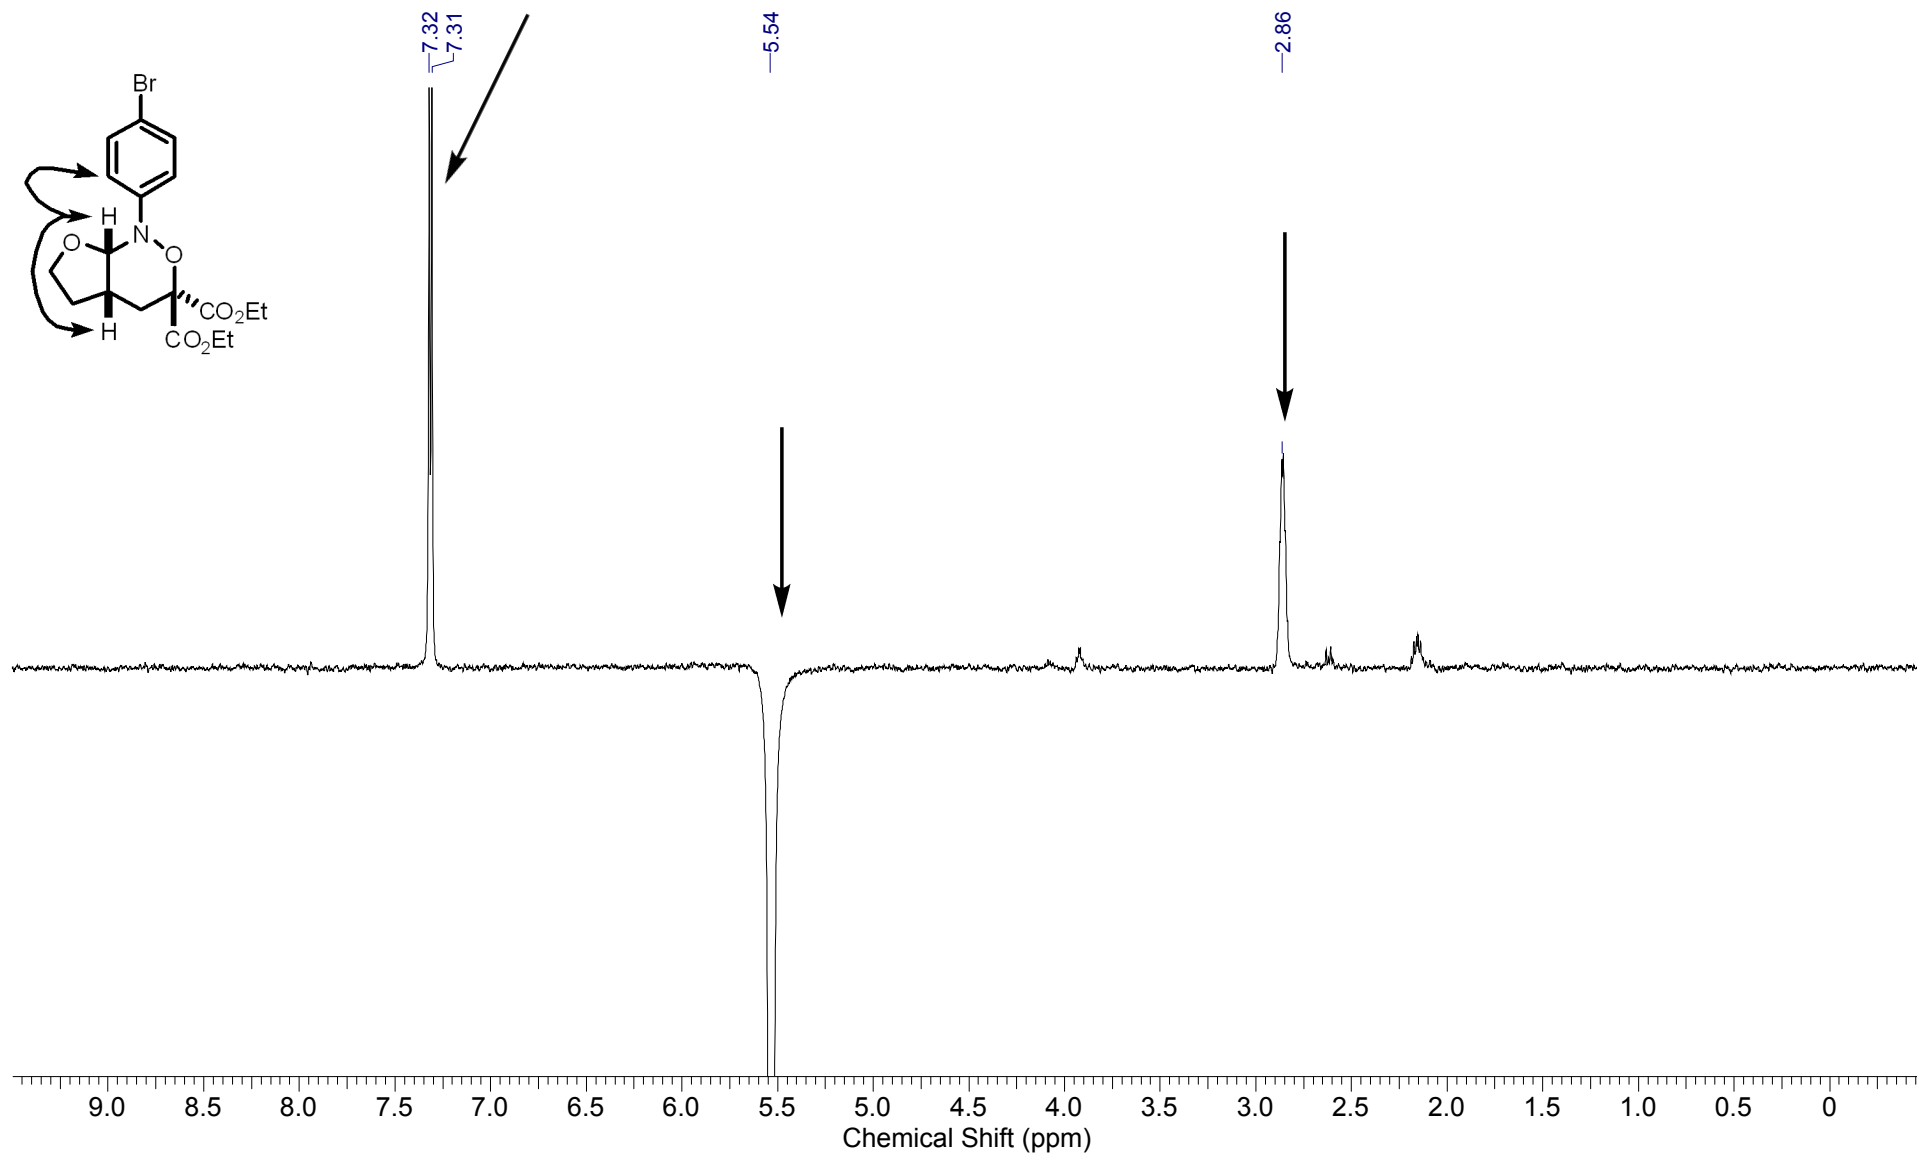



Sample Name:  
Andrew  
Data Collected on:  
nmrrh600.chem.uwo.ca-inova600  
Archive directory:  
/home/data/Pagenkopf/Andrew  
Sample directory:  
ACS-15N\_experiments\_Sept\_26\_11\_01  
FidFile: gHMBCAD\_04

Pulse Sequence: gHMBCAD  
Solvent: cdcl3  
Data collected on: May 24 2012

Temp. 25.0 C / 298.1 K  
Operator: Pagenkopf

Relax. delay 2.100 sec  
Acq. time 0.150 sec  
Width 5711.0 Hz  
2D Width 36463.1 Hz  
56 repetitions  
2 x 200 increments  
OBSERVE H1, 599.4989385 MHz  
DATA PROCESSING  
Sq. sine bell 0.075 sec  
F1 DATA PROCESSING  
Gauss apodization 0.010 sec  
FT size 2048 x 4096  
Total time 14 hr, 34 min

# $^1\text{H}$ - $^{15}\text{N}$ HMBC Correlations of 3b

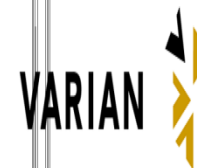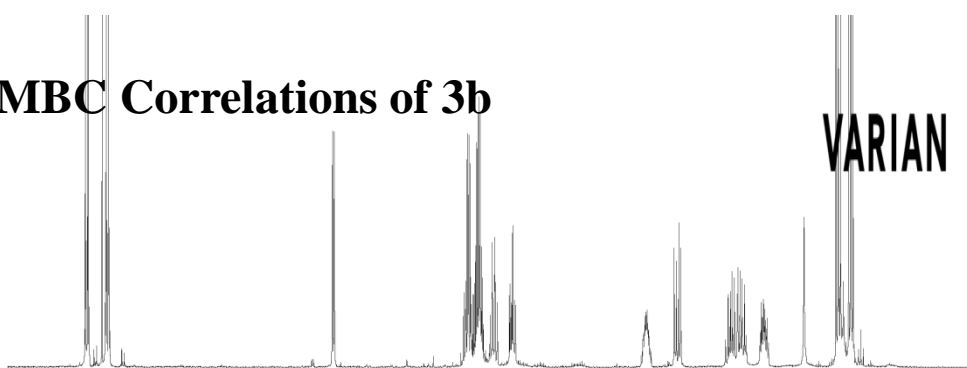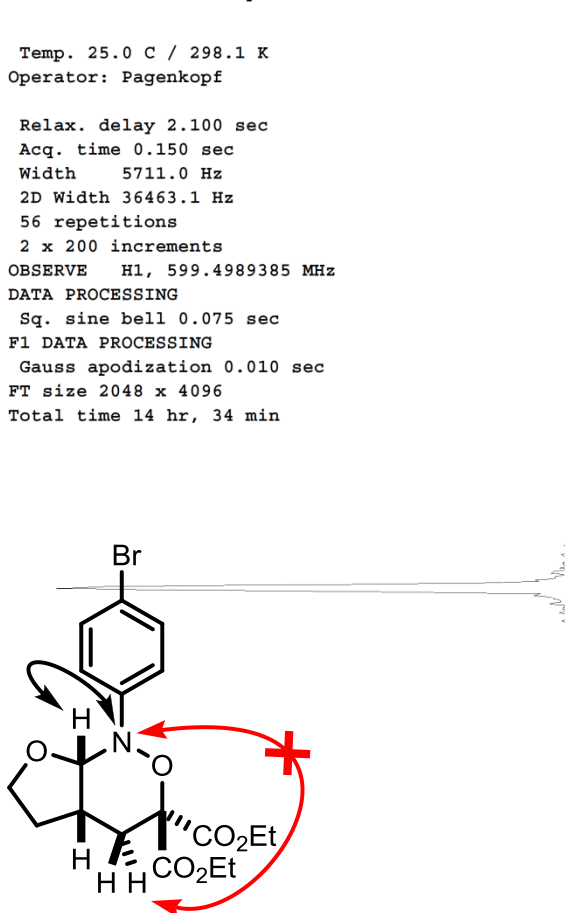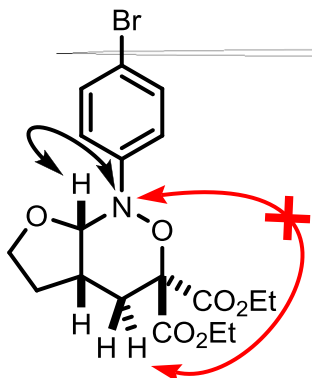

3b

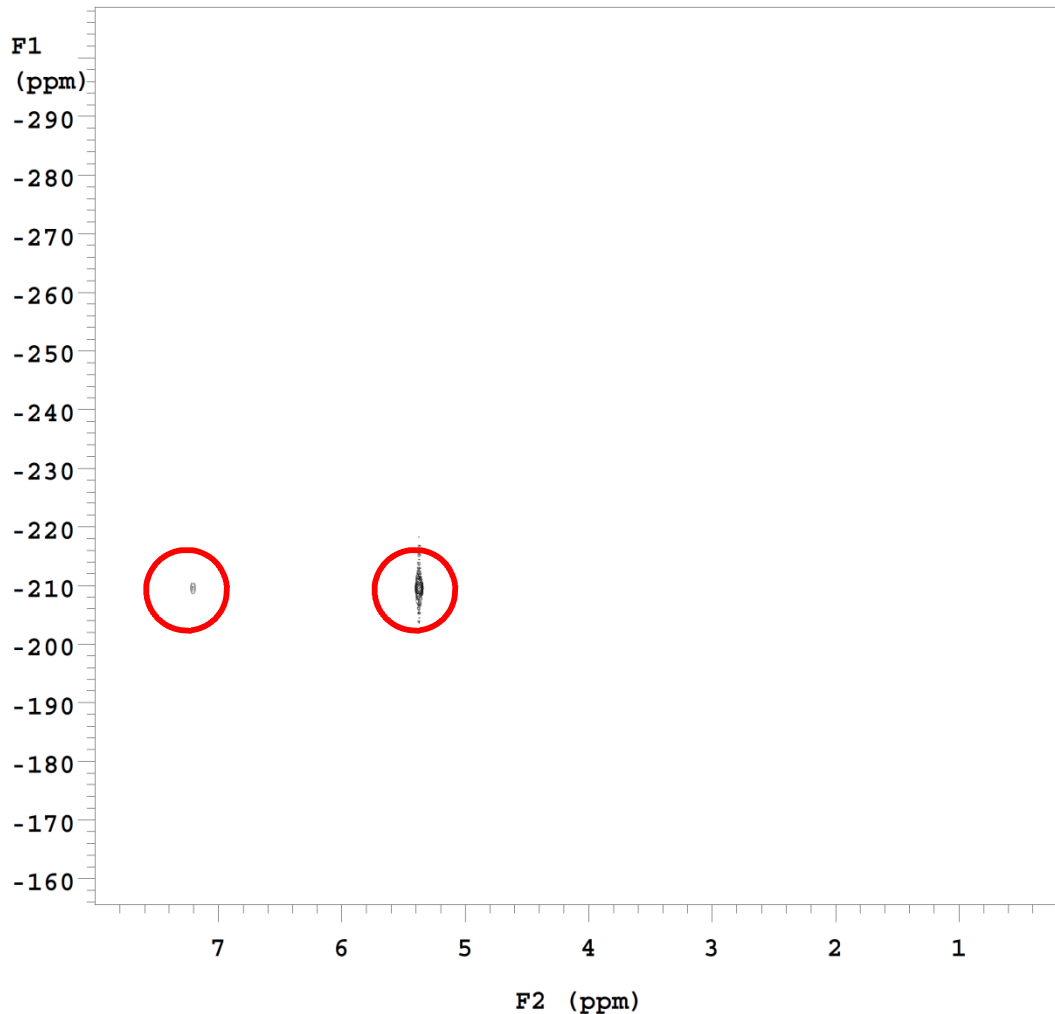

**(4a*S*\*,7a*S*\*)-diethyl 1-(4-chlorophenyl)tetrahydro-1*H*-furo[2,3-*c*][1,2]oxazine-3,3(7a*H*)-dicarboxylate (3c)**

3C.ESP

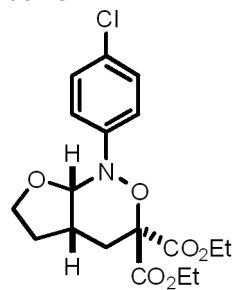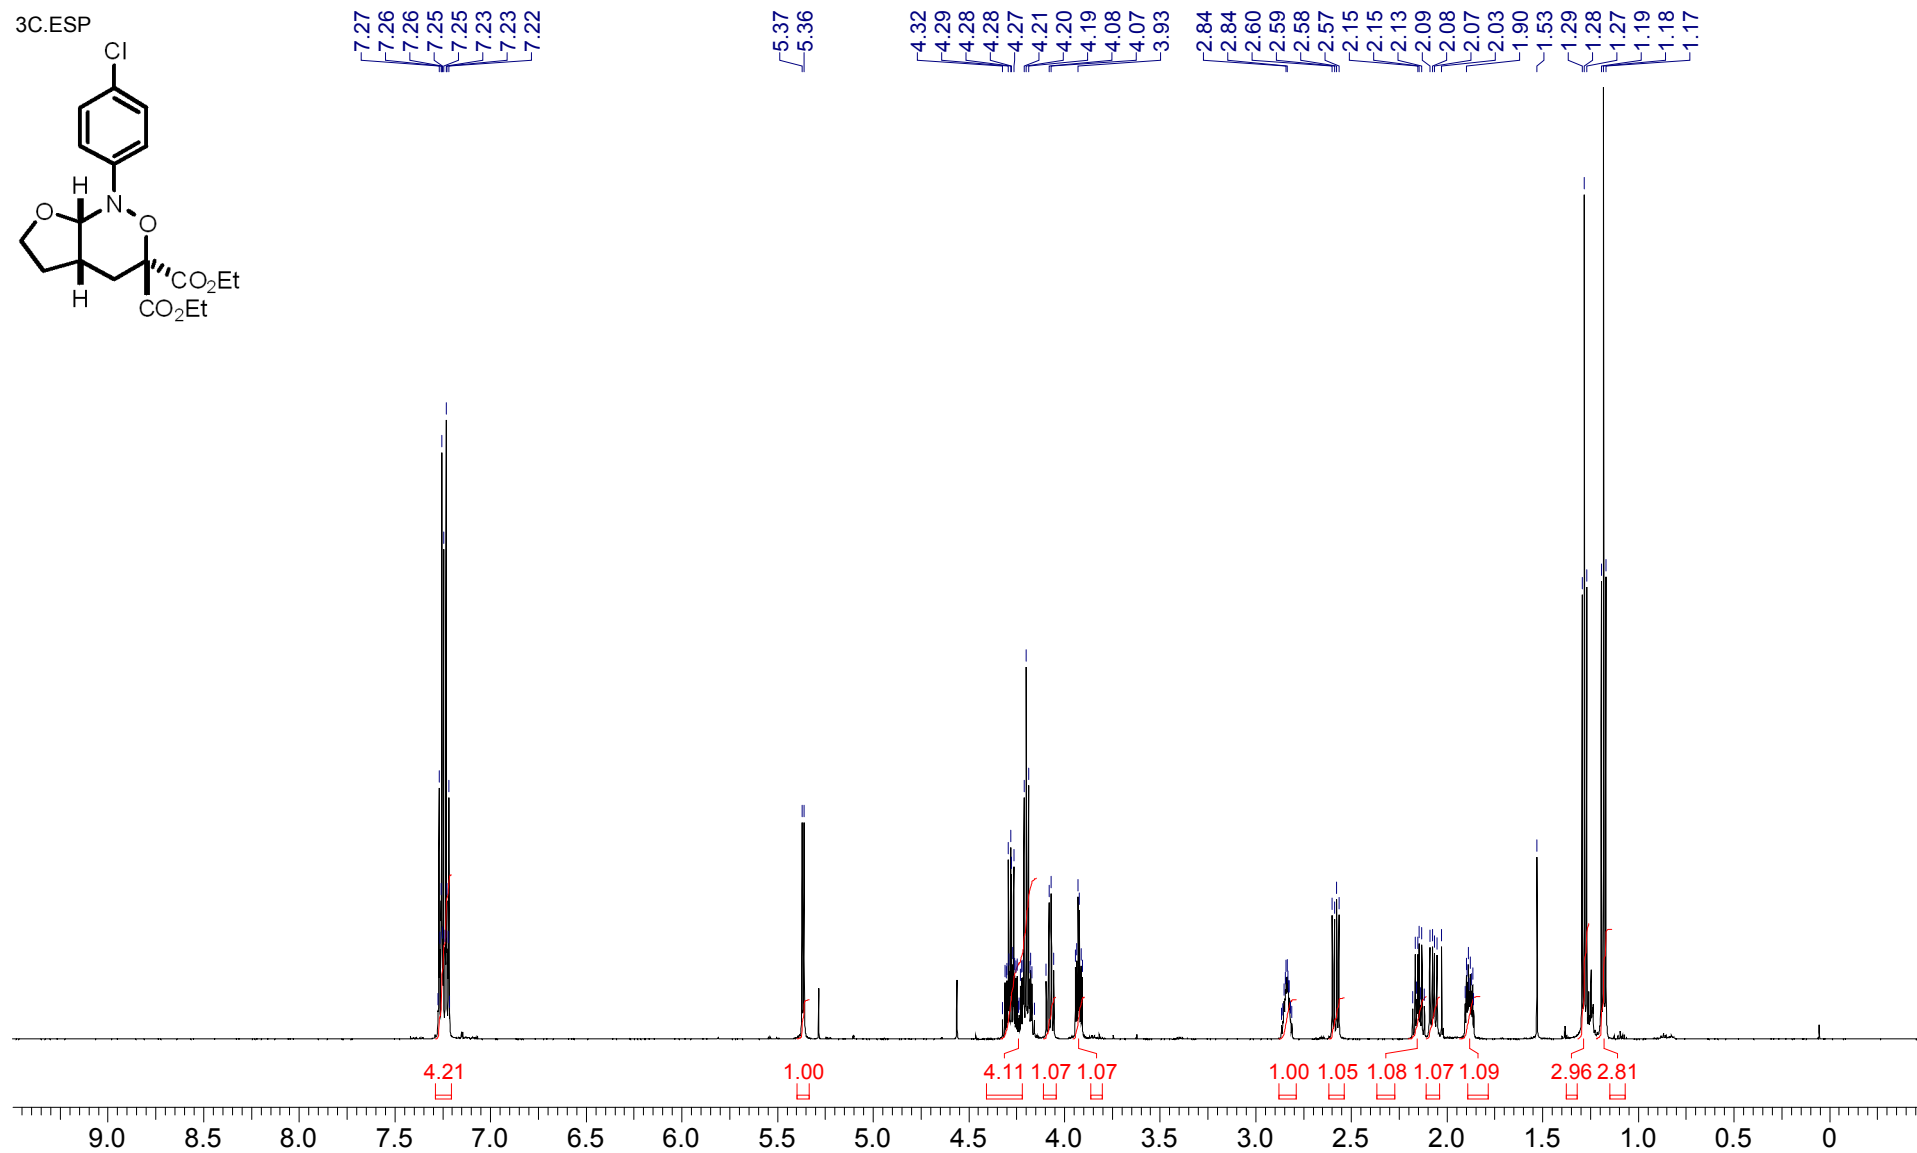

(4a*S*\*,7a*S*\*)-diethyl 1-(4-chlorophenyl)tetrahydro-1*H*-furo[2,3-*c*][1,2]oxazine-3,3(7a*H*)-dicarboxylate (**3c**)

3C.ESP

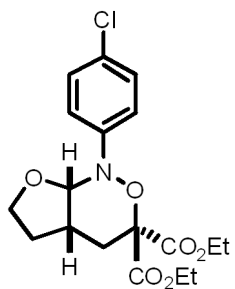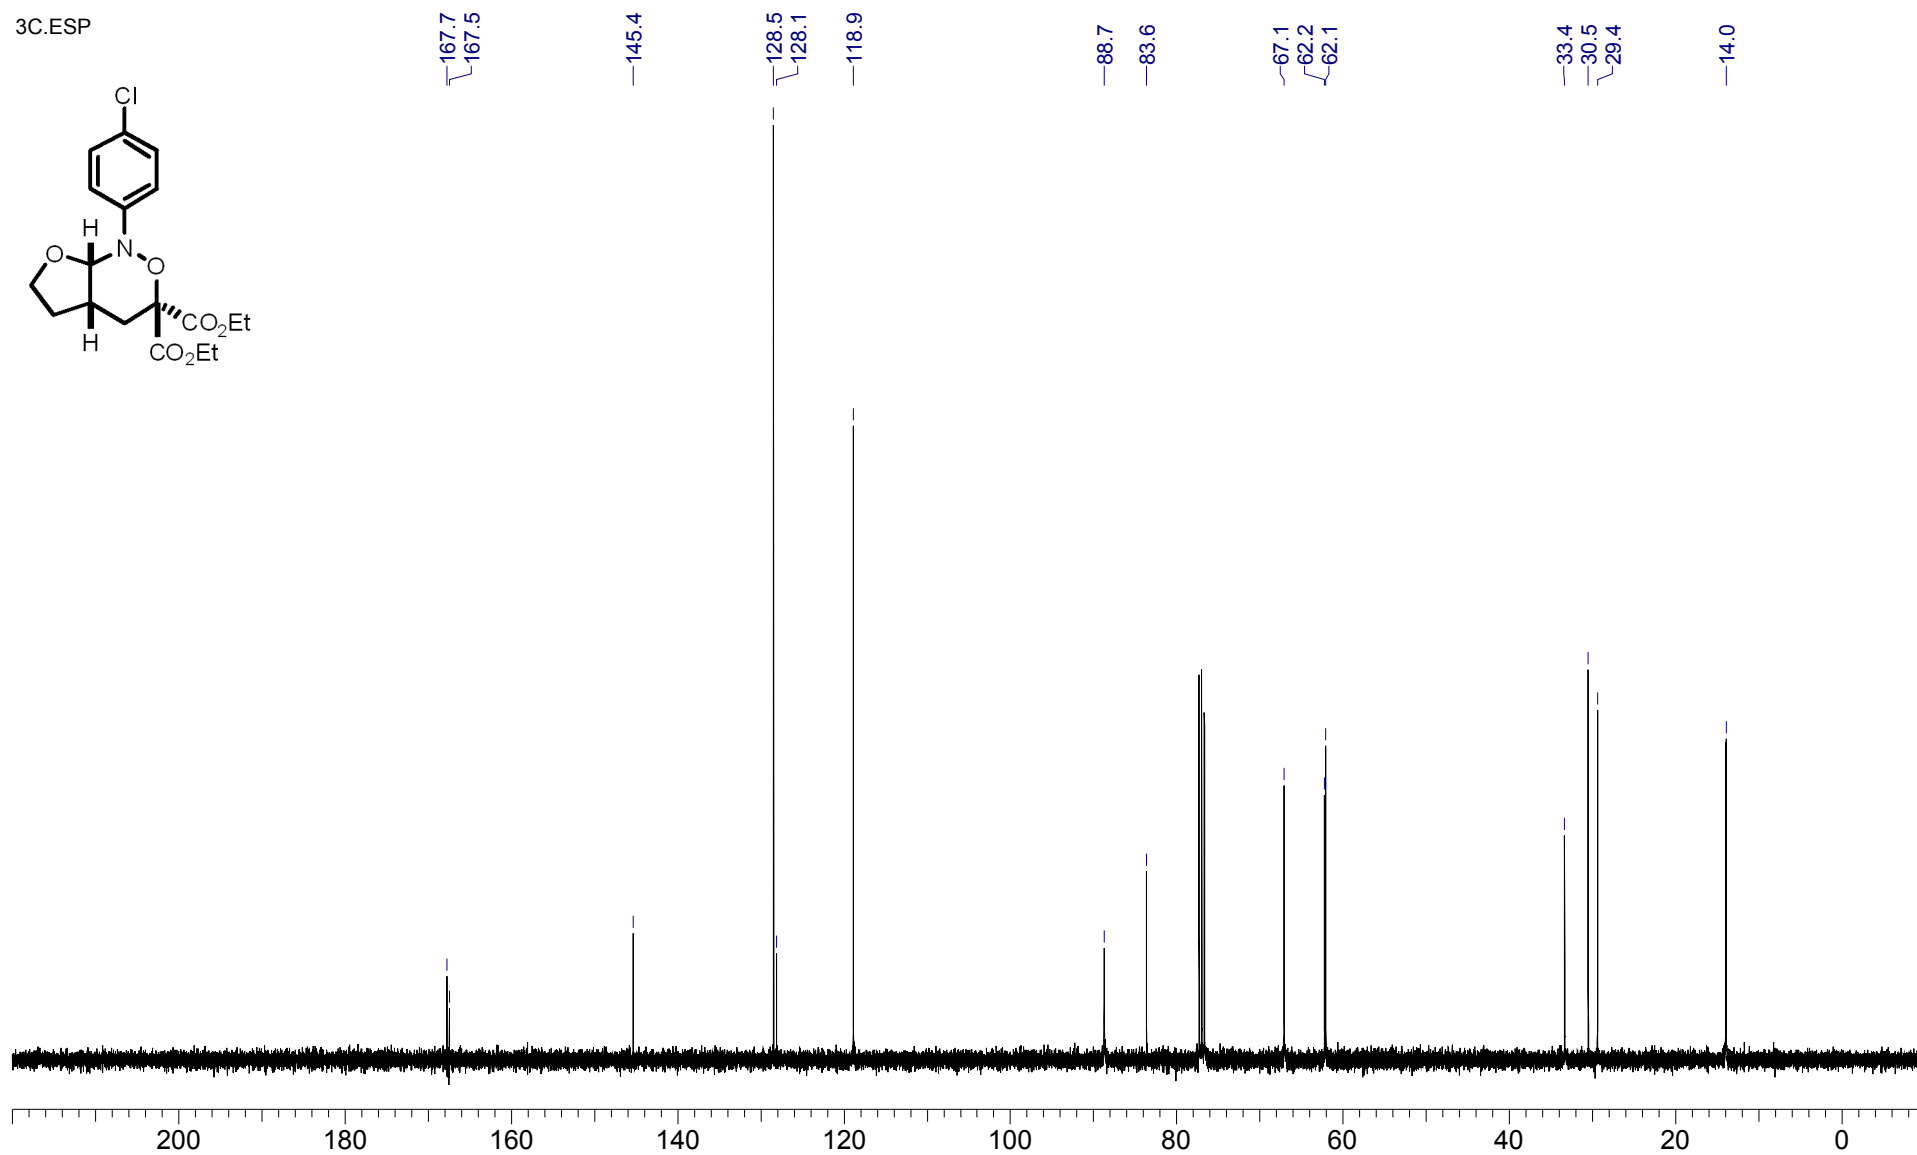

## nOe correlations of 3c

Naresh

Sample Name:  
Naresh  
Data Collected on:  
nmrm400.chem.uwo.ca-mercury400  
Archive directory:  
/home/data/Pagenkopf/Naresh  
Sample directory:  
VN-07-32-P\_Mar\_12\_2013\_01  
FidFile: NOESY\_01

Pulse Sequence: NOESY  
Solvent: cdcl3  
Data collected on: Mar 12 2013

Temp. 25.0 C / 298.1 K  
Sample #31, Operator: Pagenkopf

Relax. delay 1.000 sec  
Acq. time 0.150 sec  
Width 6402.0 Hz  
2D Width 6402.0 Hz  
16 repetitions  
2 x 200 increments  
OBSERVE H1, 400.0802686 MHz  
DATA PROCESSING  
Gauss apodization 0.069 sec  
F1 DATA PROCESSING  
Gauss apodization 0.029 sec  
FT size 2048 x 2048  
Total time 2 hr, 32 min

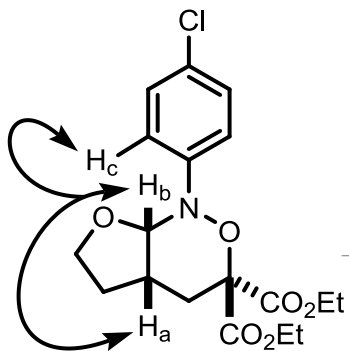

3c

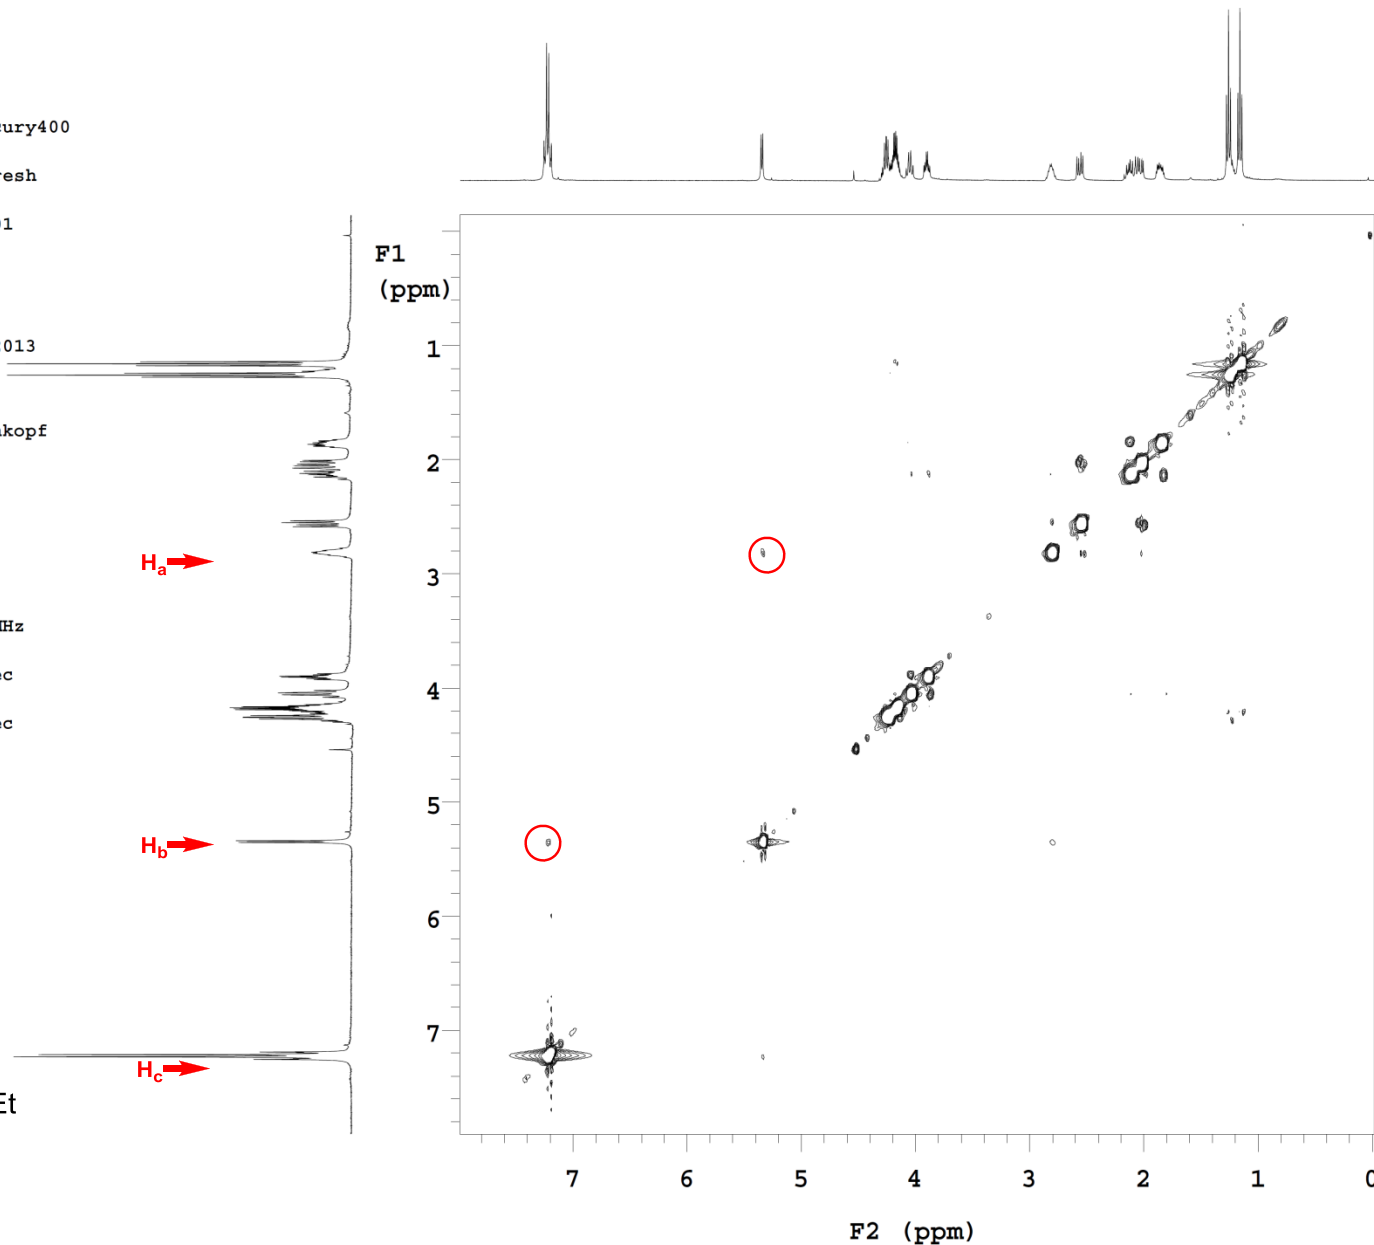

**(4a*S*\*,7a*S*\*)-diethyl 1-(3-bromophenyl)tetrahydro-1*H*-furo[2,3-*c*][1,2]oxazine-3,3(7a*H*)-dicarboxylate (3d)**

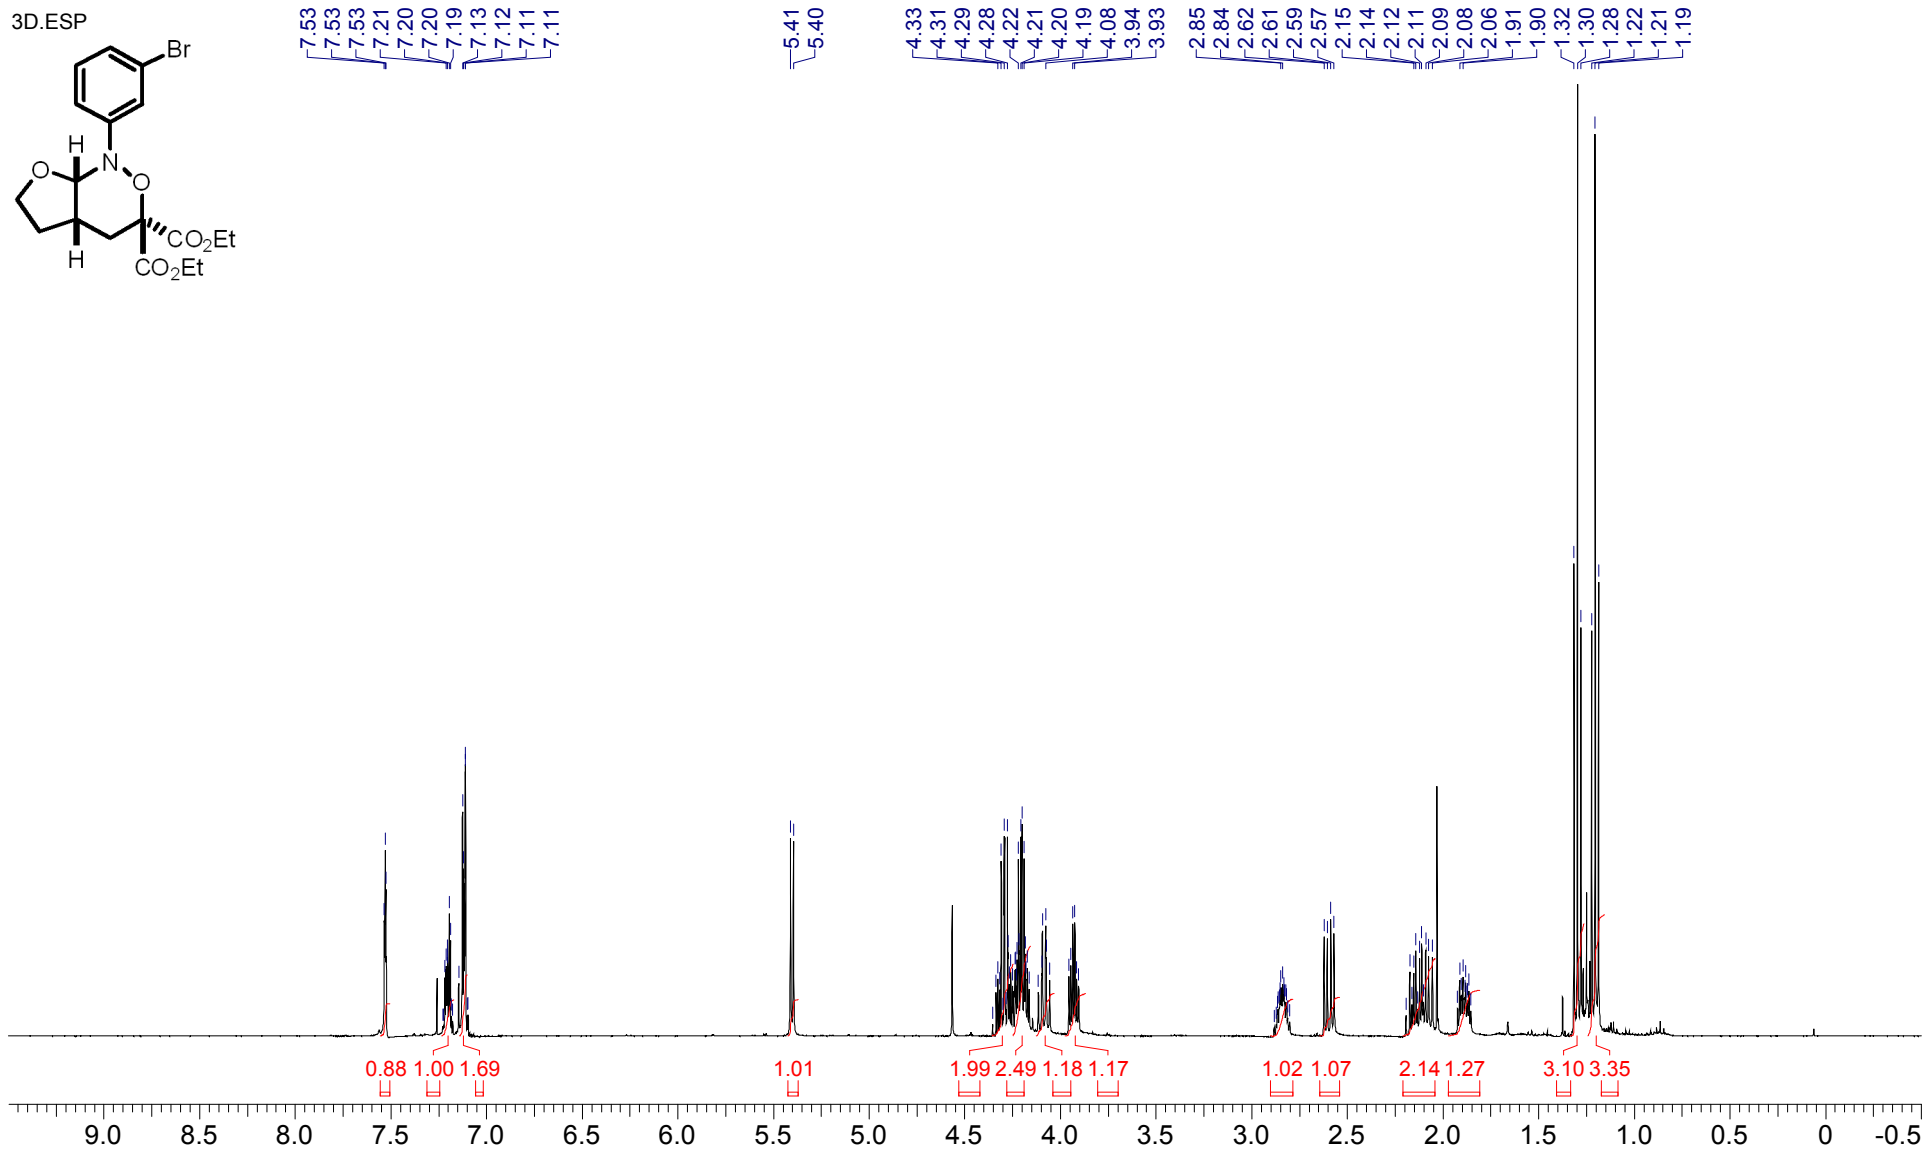

**(4a*S*\*,7a*S*\*)-diethyl 1-(3-bromophenyl)tetrahydro-1*H*-furo[2,3-*c*][1,2]oxazine-3,3(7a*H*)-dicarboxylate (3d)**

3D.ESP

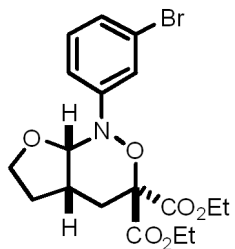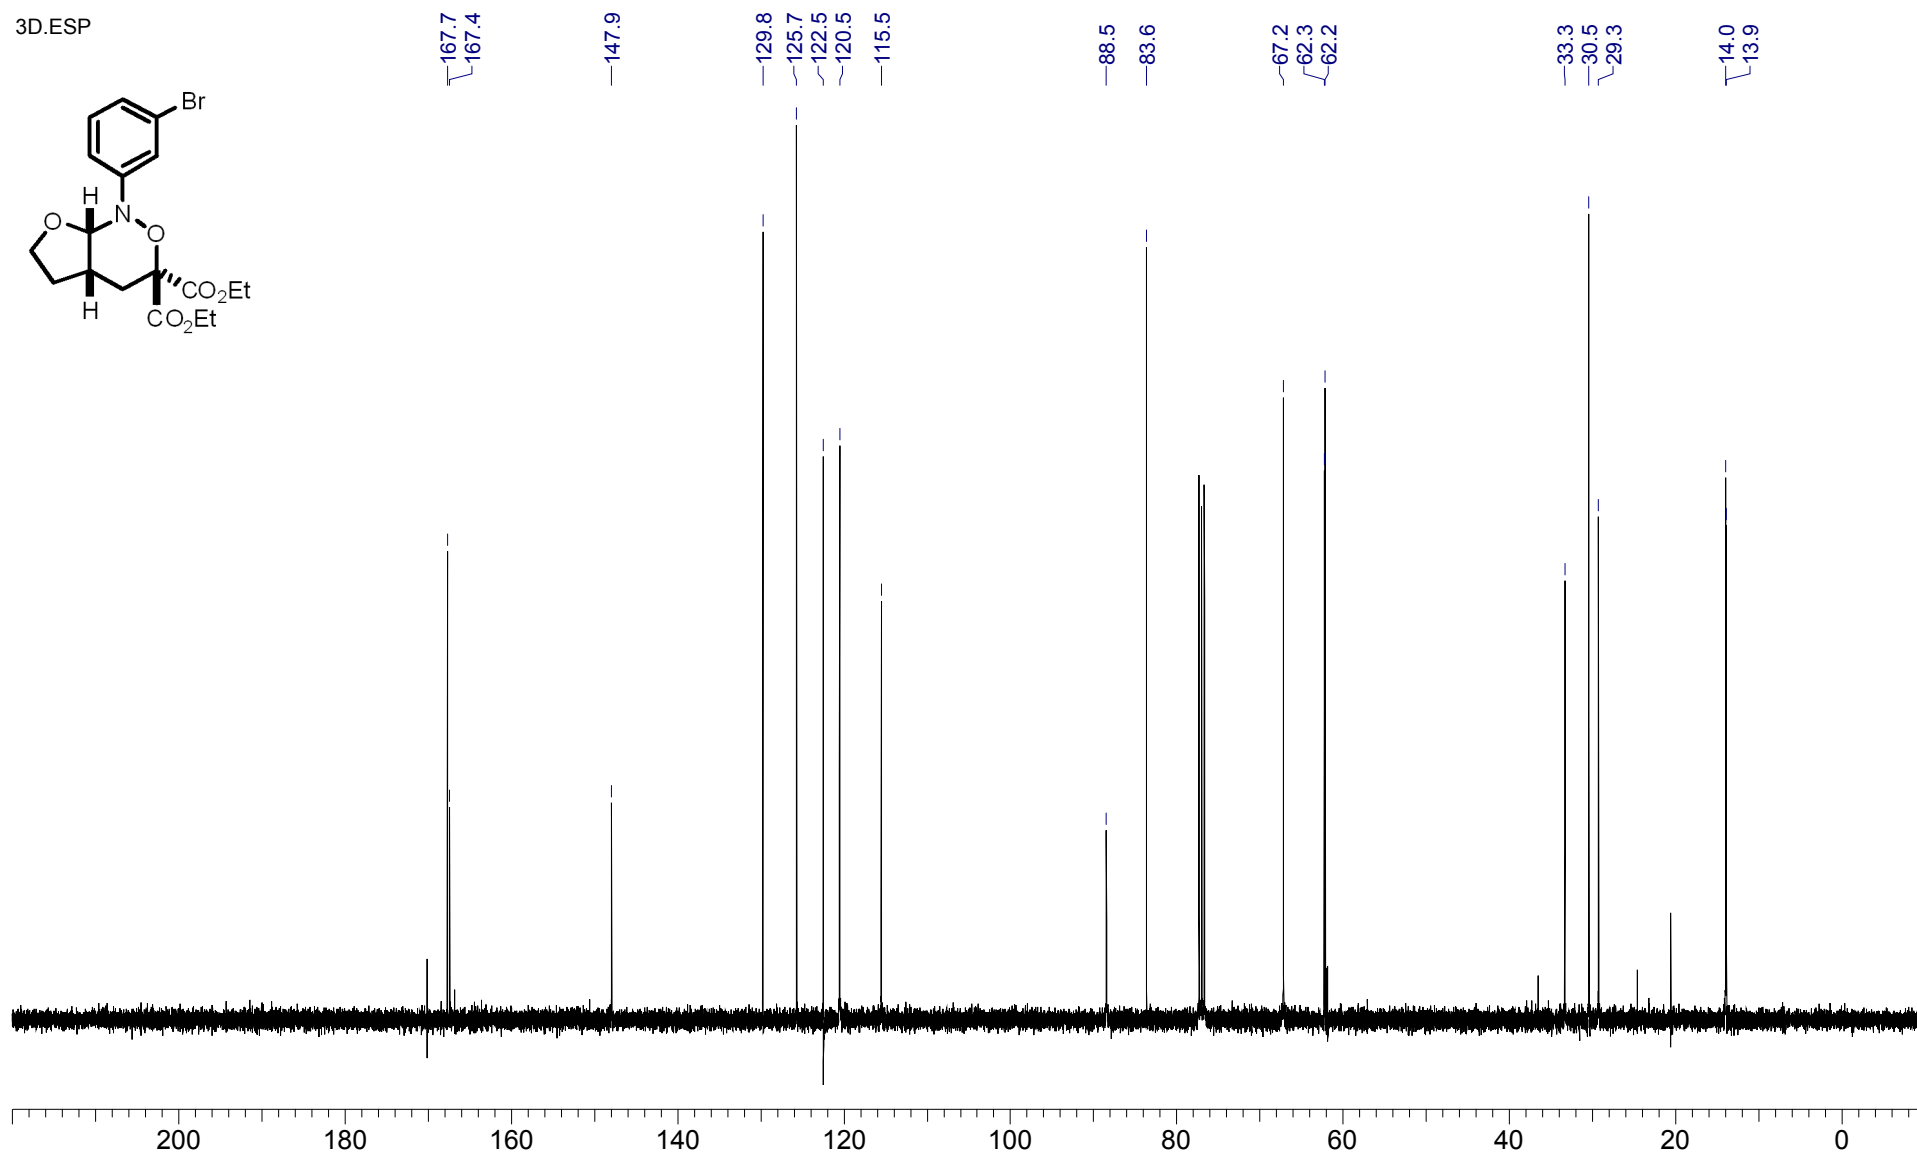

Naresh

## nOe correlations of 3d

Sample Name:  
Naresh  
Data Collected on:  
nmrm400.chem.uwo.ca-mercury400  
Archive directory:  
/home/data/Pagenkopf/Naresh  
Sample directory:  
VN-07-44-P\_Mar\_18\_2013\_01  
FidFile: NOESY\_01

Pulse Sequence: NOESY  
Solvent: cdcl3  
Data collected on: Mar 18 2013

Temp. 25.0 C / 298.1 K  
Sample #43, Operator: Pagenkopf

Relax. delay 1.000 sec  
Acq. time 0.150 sec  
Width 6402.0 Hz  
2D Width 6402.0 Hz  
16 repetitions  
2 x 200 increments  
OBSERVE H1, 400.0802686 MHz  
DATA PROCESSING  
Gauss apodization 0.069 sec  
F1 DATA PROCESSING  
Gauss apodization 0.029 sec  
FT size 2048 x 2048  
Total time 2 hr, 32 min

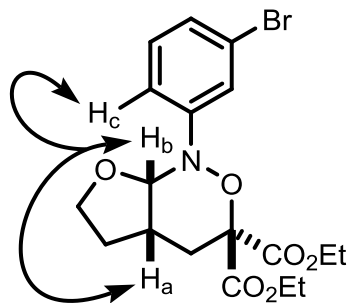

3d

H<sub>a</sub> →

H<sub>b</sub> →

H<sub>c</sub> →

F1  
(ppm)

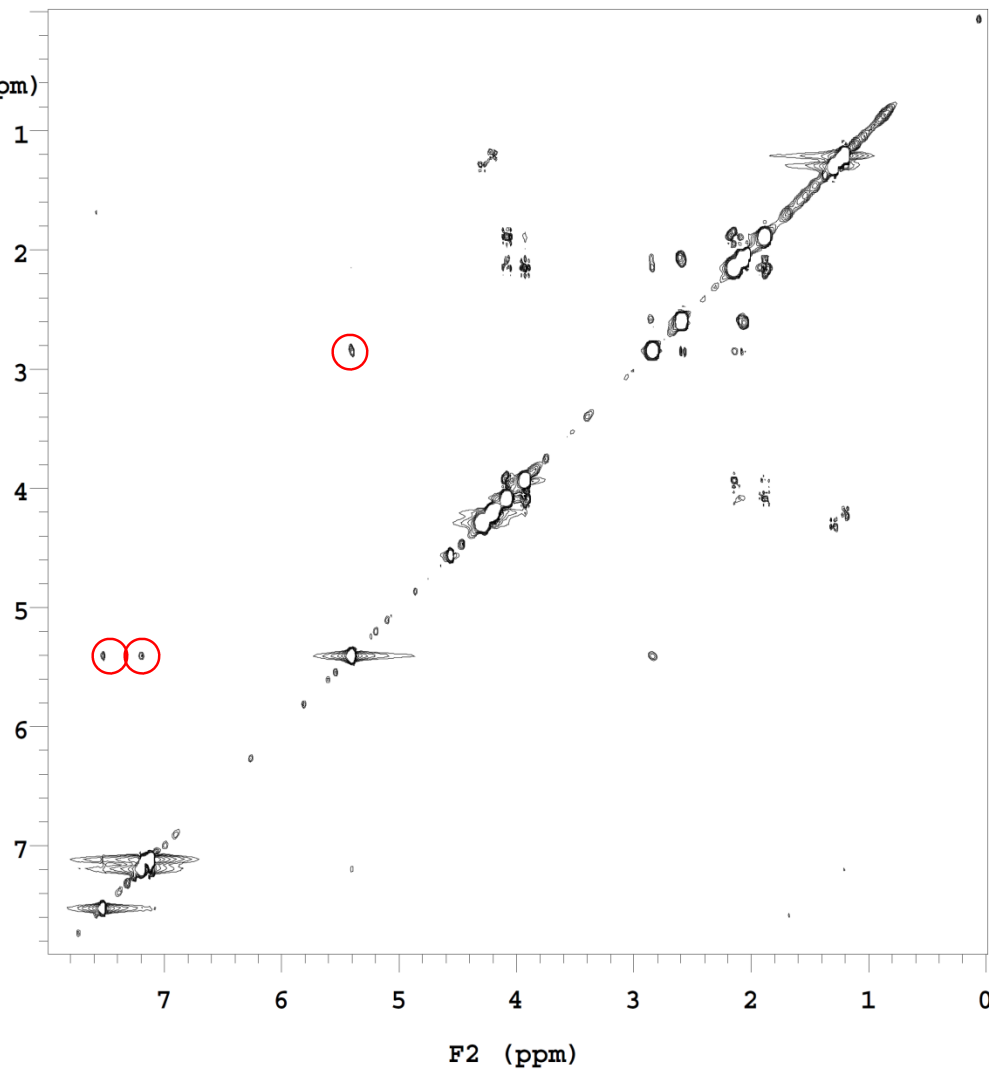

**(4a*S*\*,7a*S*\*)-diethyl 1-(3-chlorophenyl)tetrahydro-1*H*-furo[2,3-*c*][1,2]oxazine-3,3(7a*H*)-dicarboxylate (3e)**

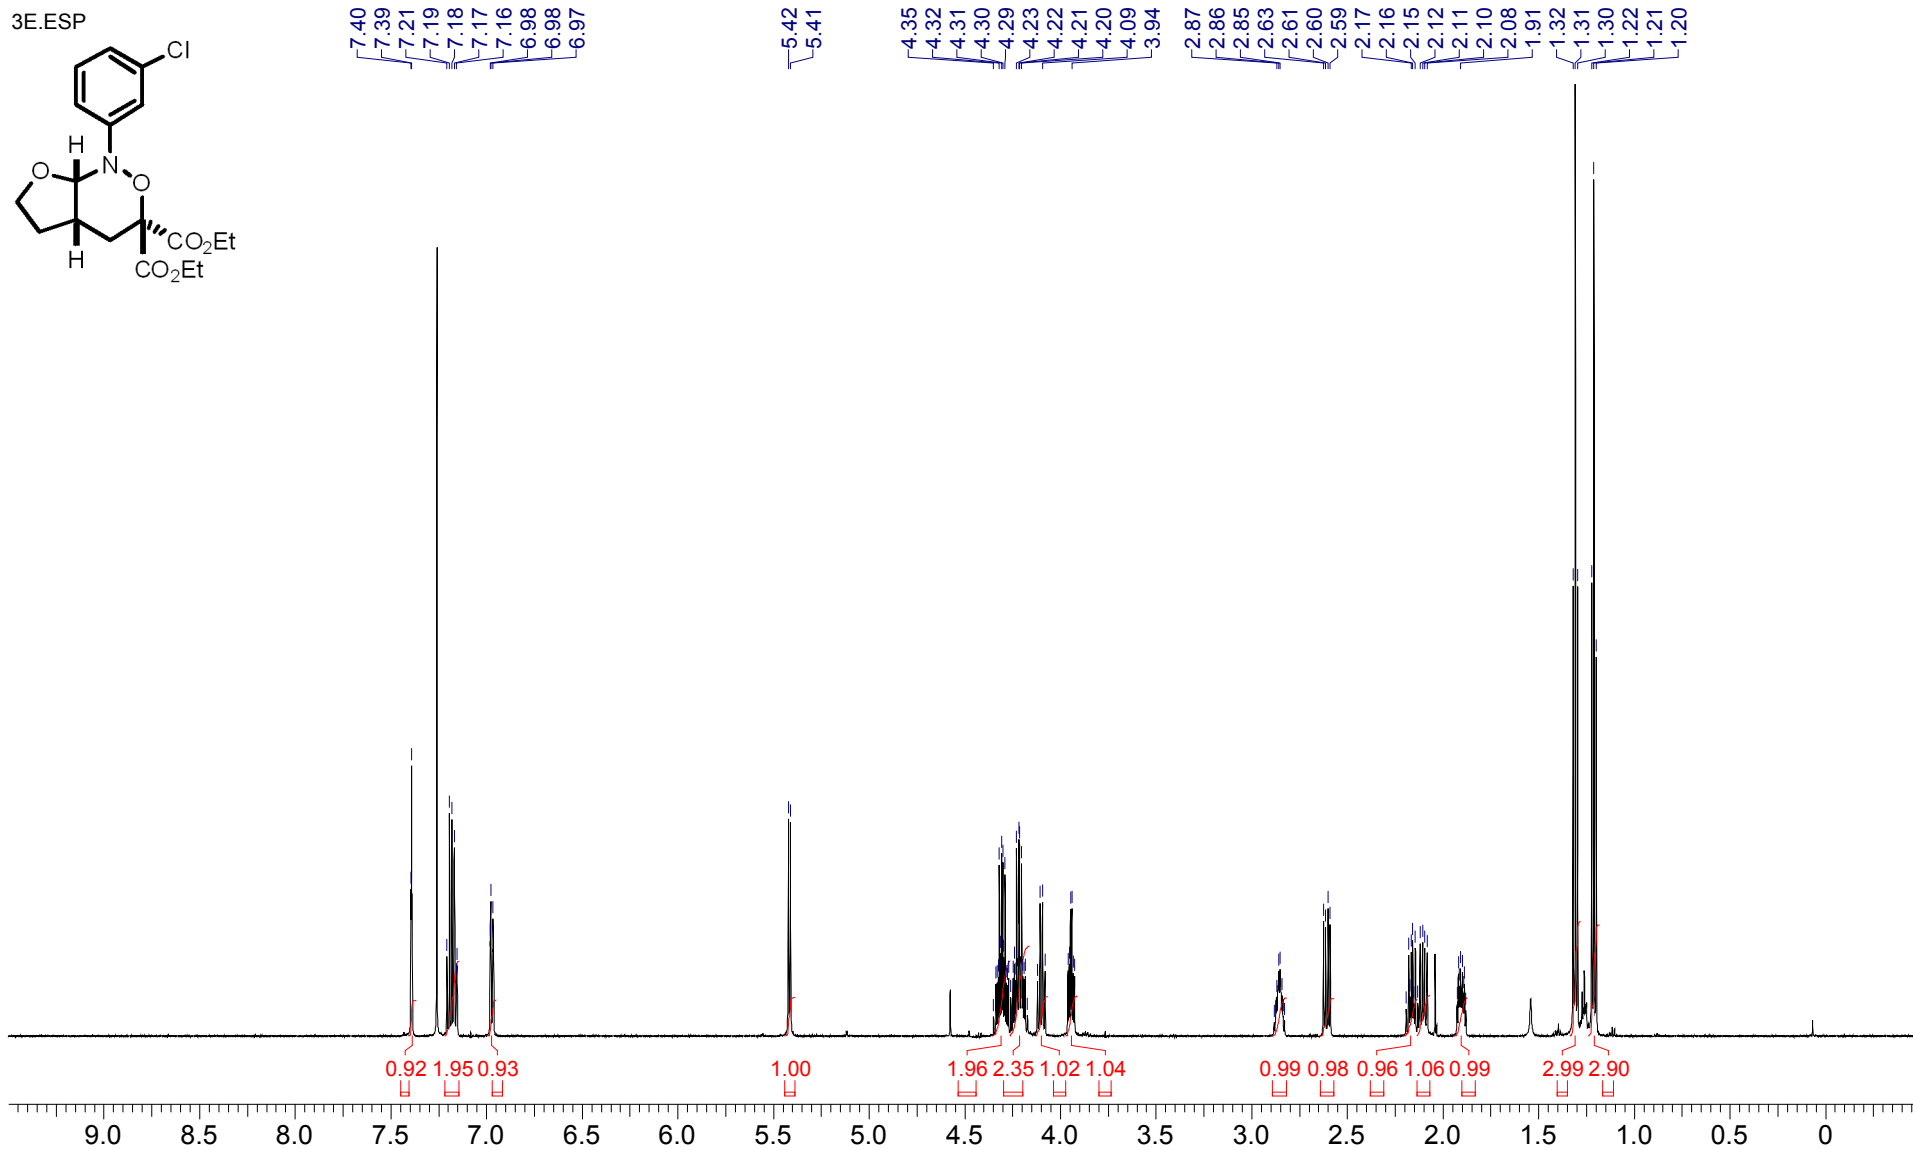



**(4a*S*\*,7a*S*\*)-diethyl 1-(3-chlorophenyl)tetrahydro-1*H*-furo[2,3-*c*][1,2]oxazine-3,3(7a*H*)-dicarboxylate (3e)**

3E.ESP

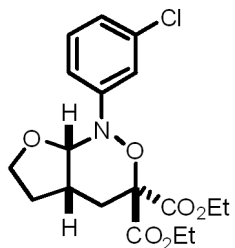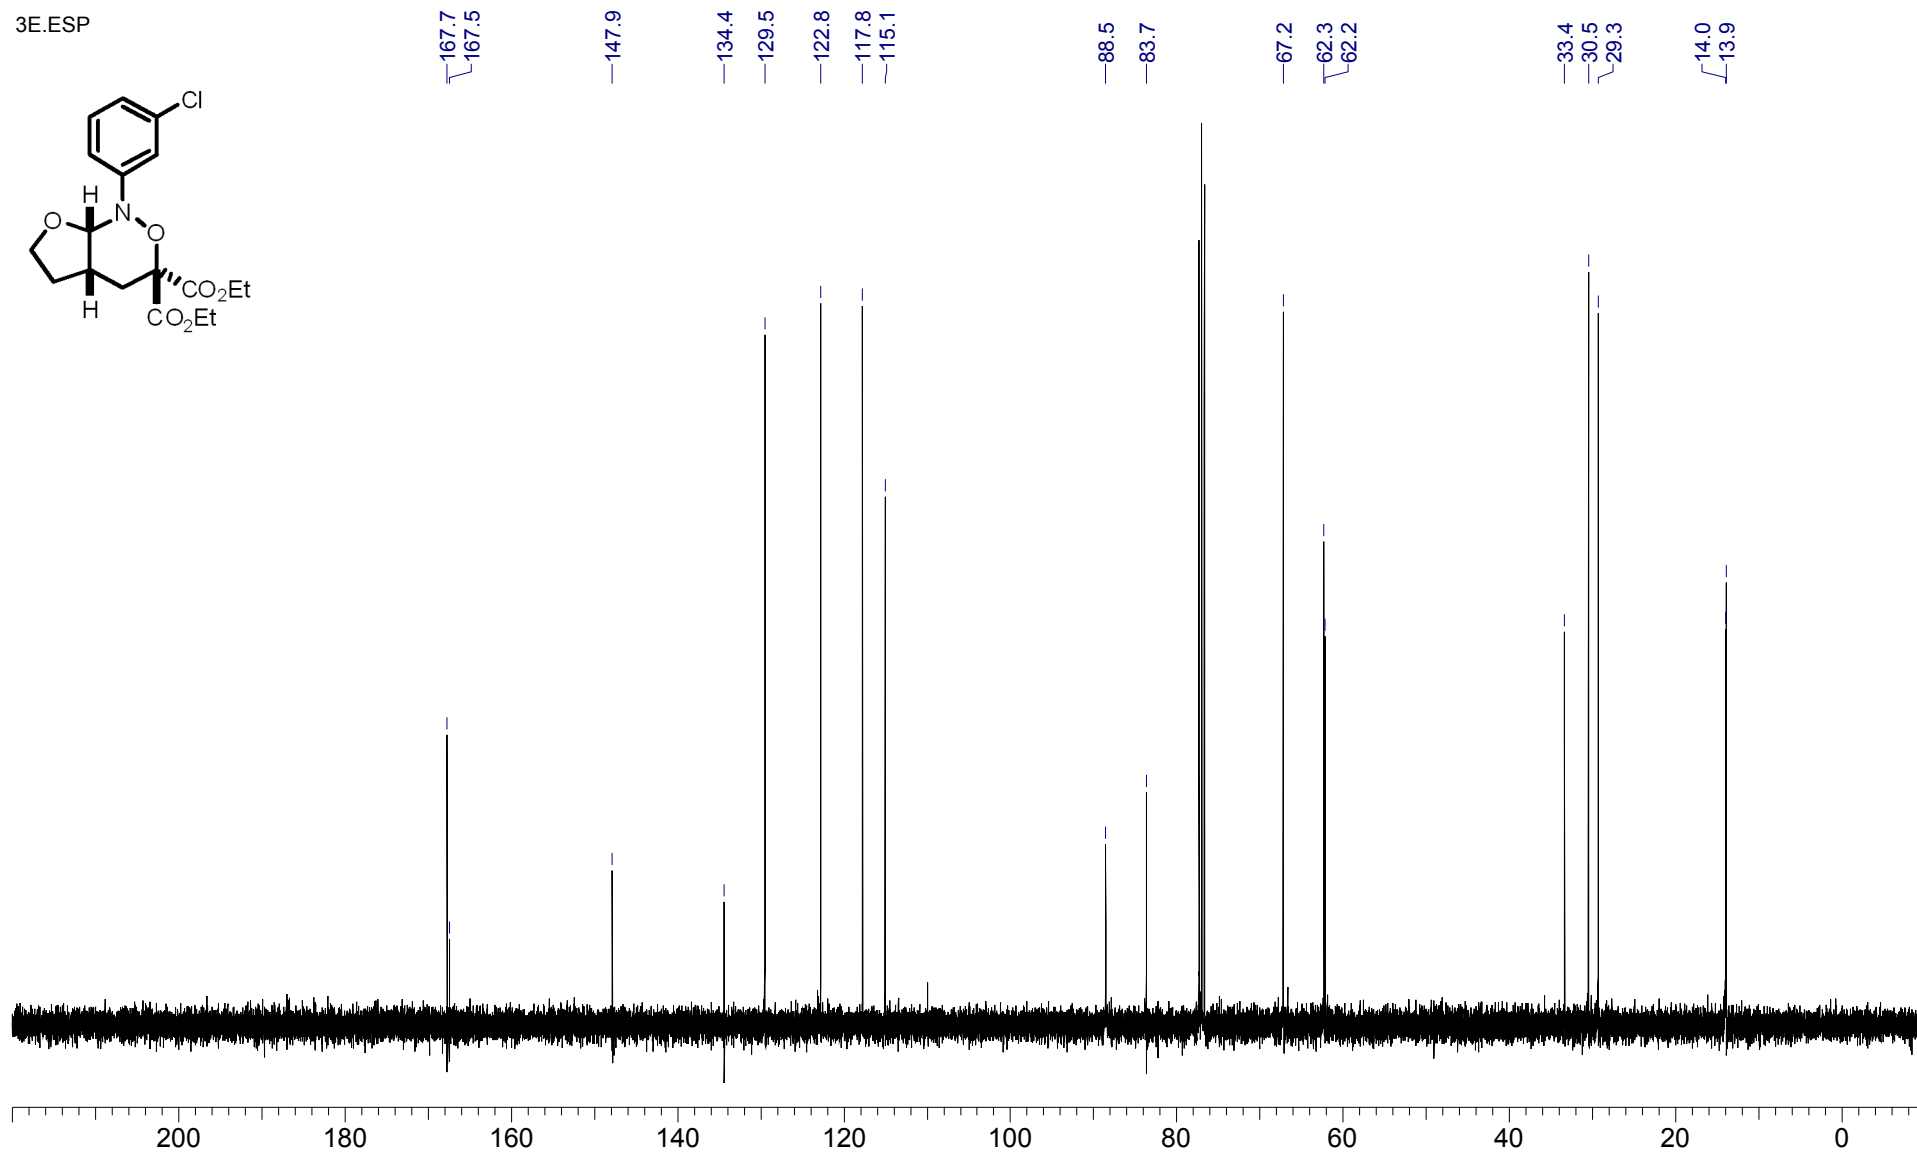

Naresh

## nOe correlations of 3e

Sample Name:  
Naresh  
Data Collected on:  
nmrm400.chem.uwo.ca-mercury400  
Archive directory:  
/home/data/Pagenkopf/Naresh  
Sample directory:  
VN-07-52-P\_Mar\_25\_2013\_01  
FidFile: NOESY\_01

Pulse Sequence: NOESY  
Solvent: cdcl3  
Data collected on: Mar 25 2013

Temp. 25.0 C / 298.1 K  
Sample #36, Operator: Pagenkopf

Relax. delay 1.000 sec  
Acq. time 0.150 sec  
Width 6402.0 Hz  
2D Width 6402.0 Hz  
16 repetitions  
2 x 200 increments  
OBSERVE H1, 400.0802921 MHz  
DATA PROCESSING  
Gauss apodization 0.069 sec  
F1 DATA PROCESSING  
Gauss apodization 0.029 sec  
FT size 2048 x 2048  
Total time 2 hr, 32 min

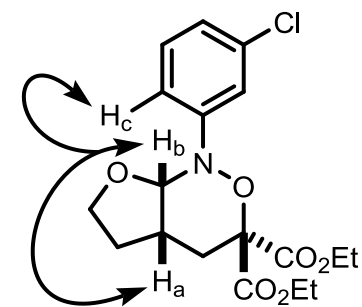

3e

H<sub>a</sub> →

H<sub>b</sub> →

H<sub>c</sub> →

F1  
(ppm)

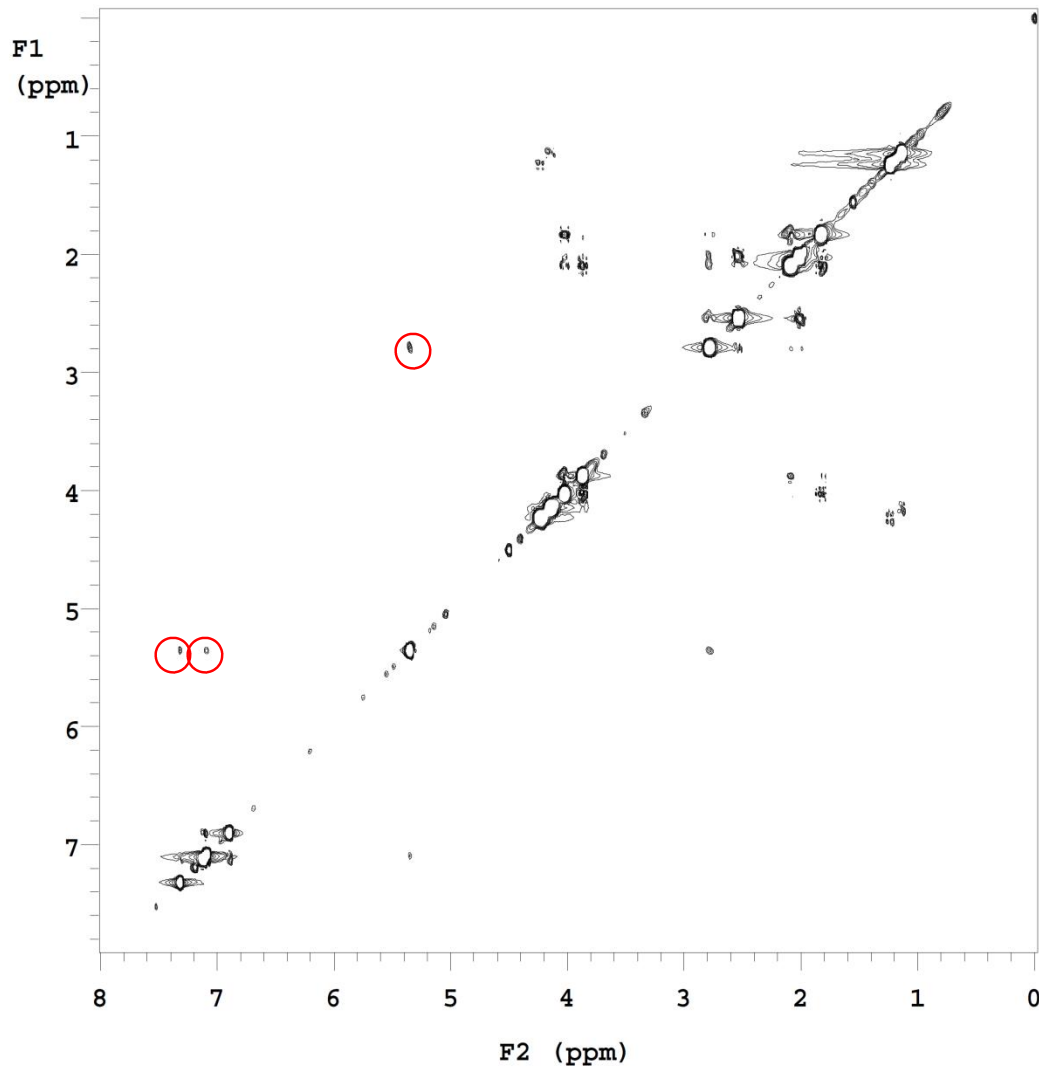

**(4a*S*\*,7a*S*\*)-diethyl 1-(2,4-dibromophenyl)tetrahydro-1H-furo[2,3-*c*][1,2]oxazine-3,3(7aH)-dicarboxylate (3f)**

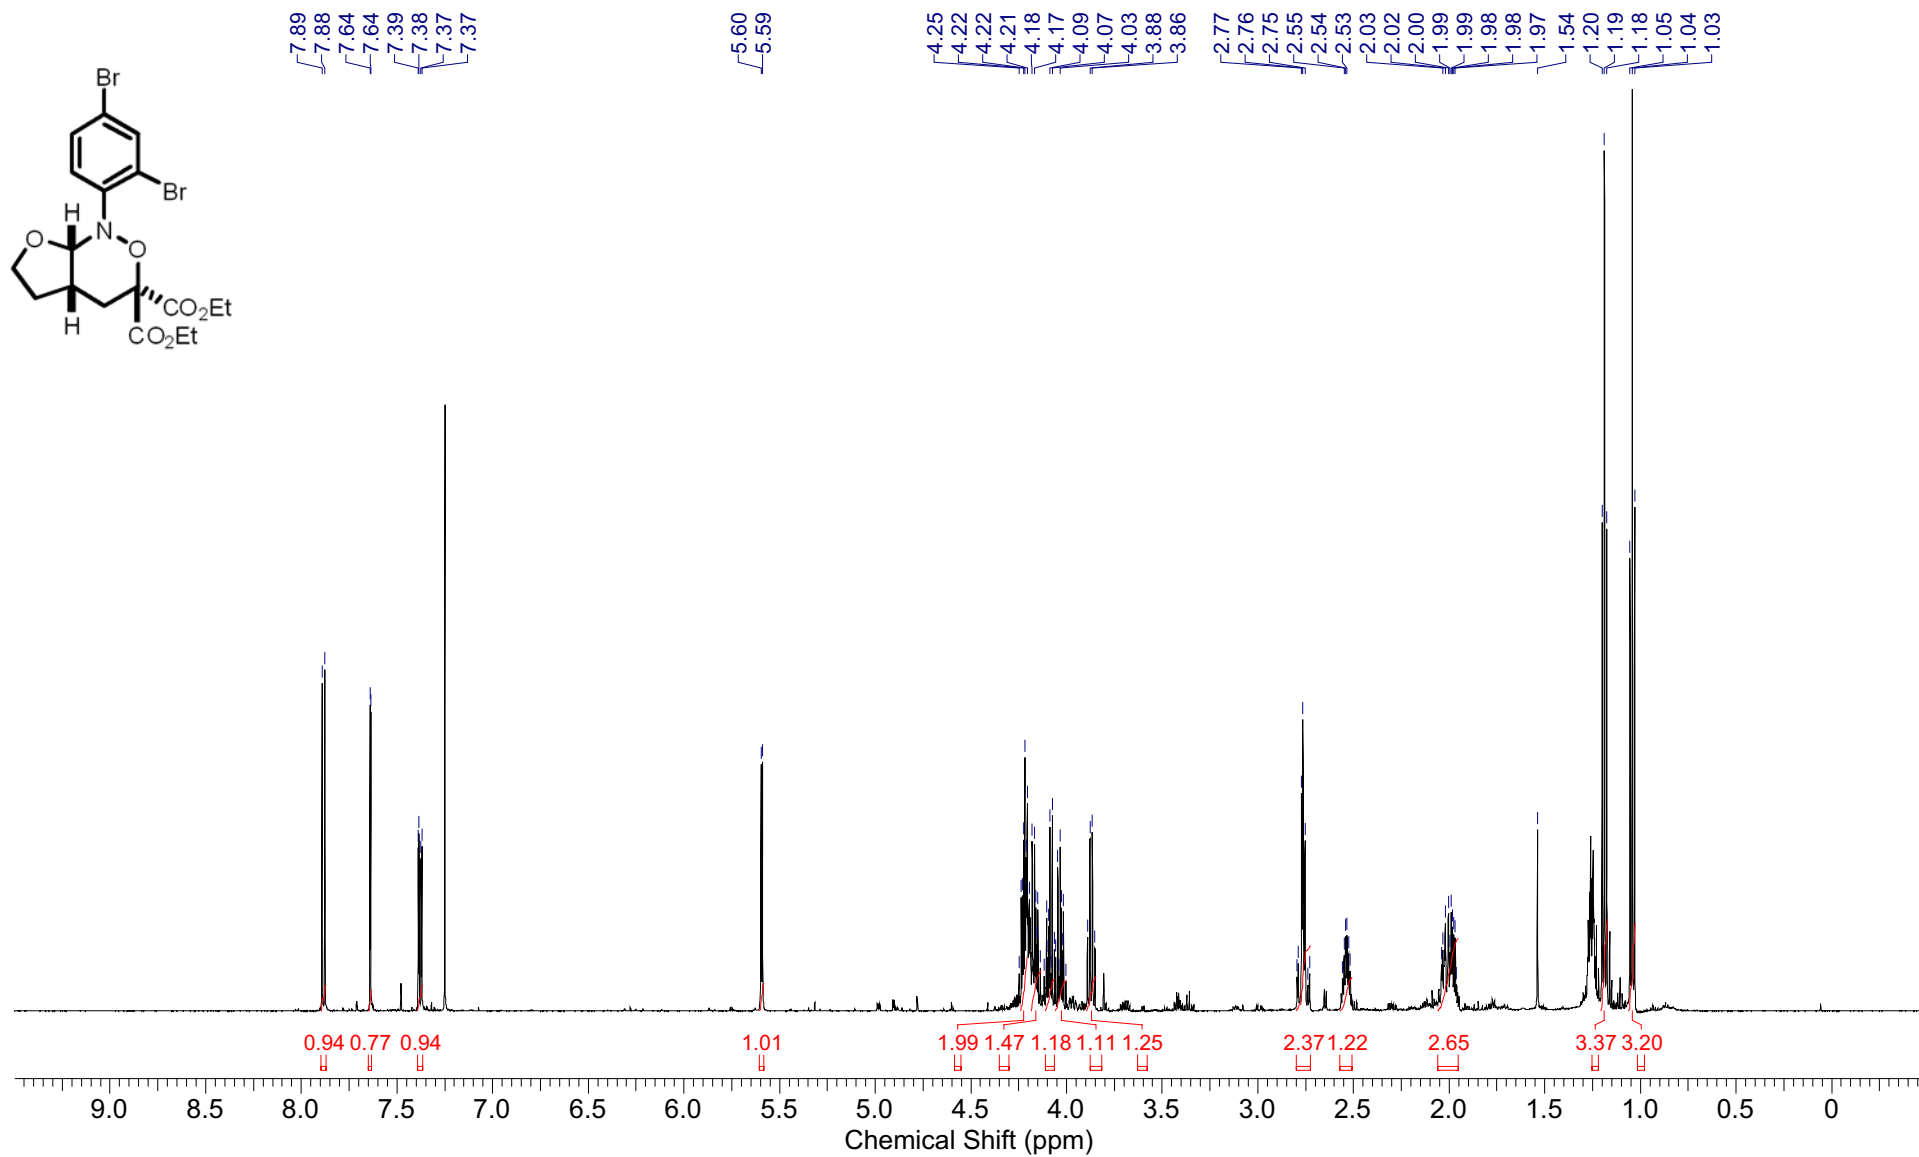

**(4a*S*\*,7a*S*\*)-diethyl 1-(2,4-dibromophenyl)tetrahydro-1H-furo[2,3-*c*][1,2]oxazine-3,3(7aH)-dicarboxylate (3f)**

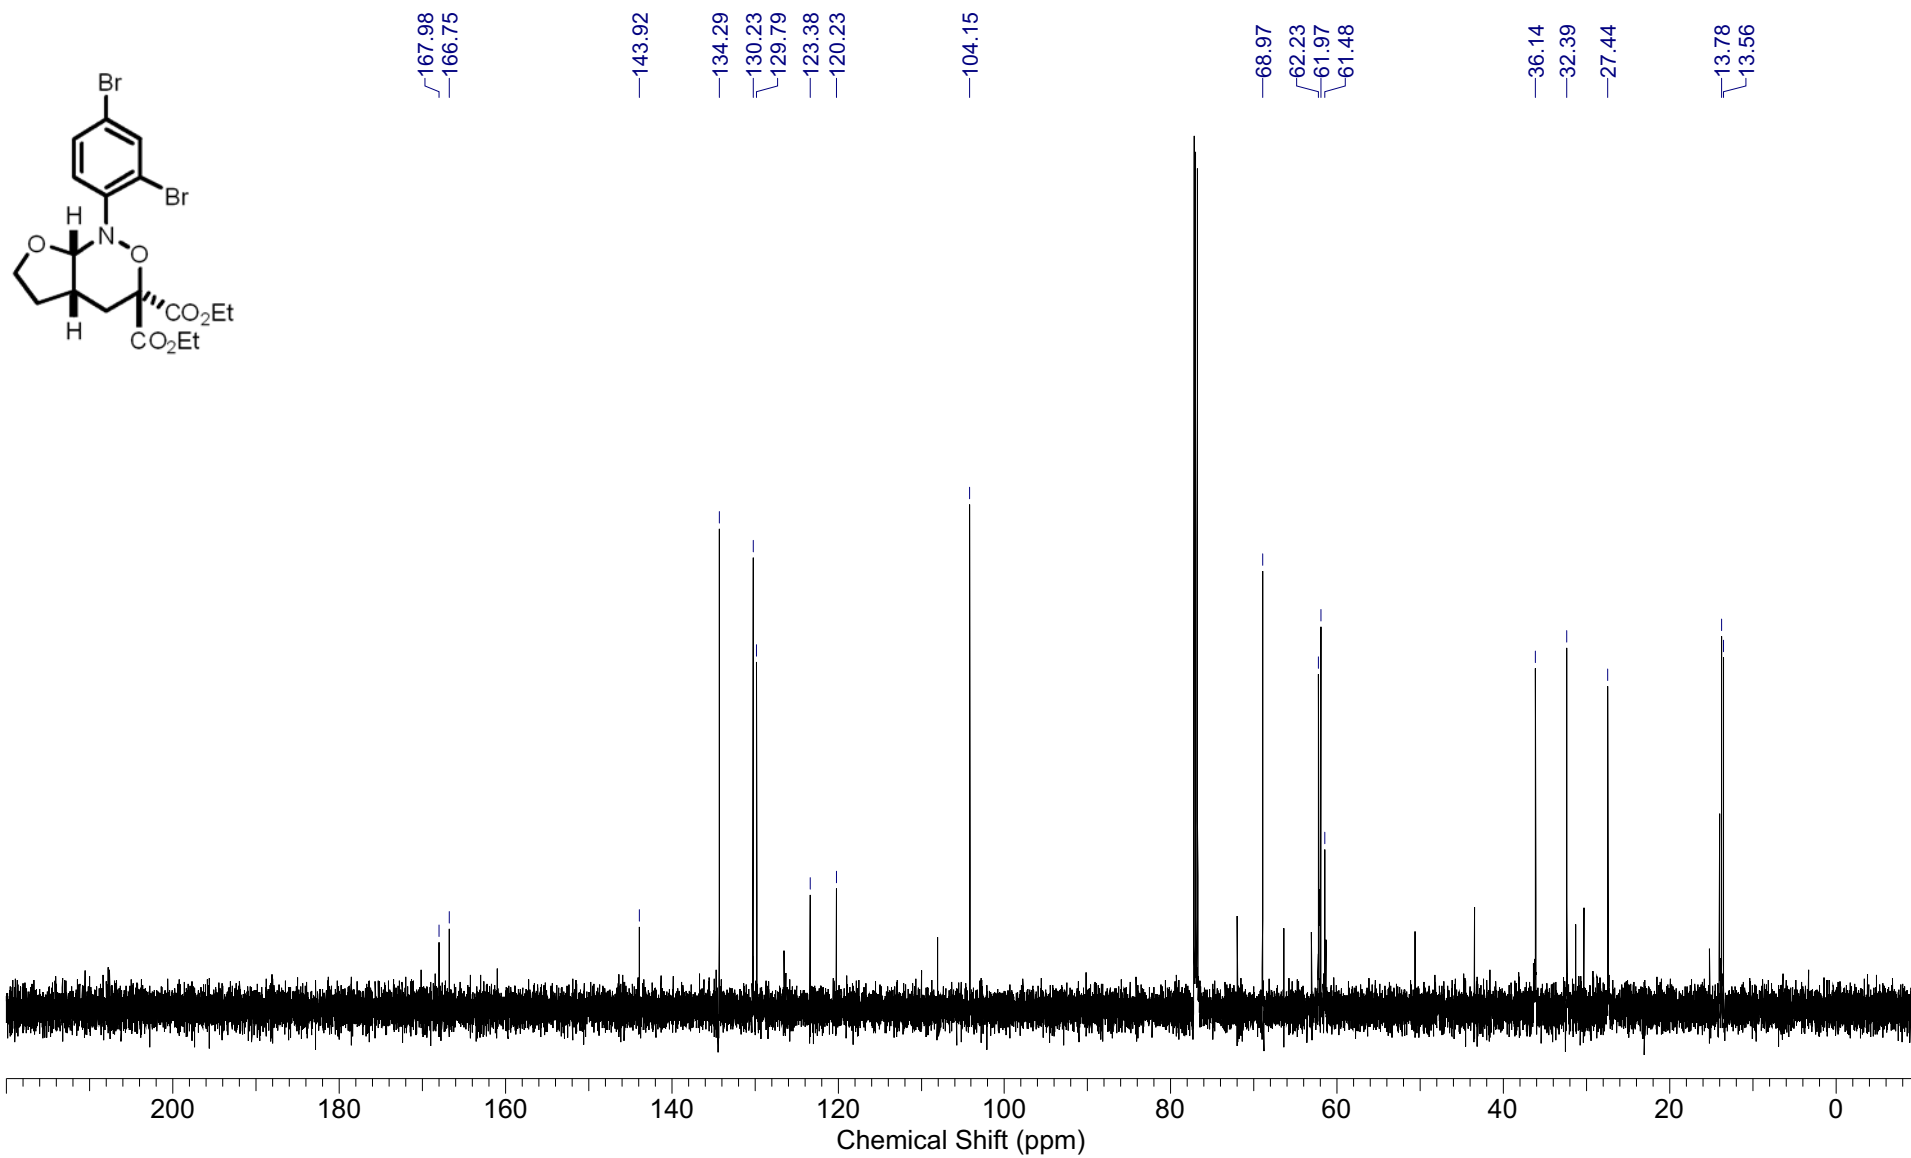

**(4a*S*\*,7a*S*\*)-diethyl 1-(3,4-dichlorophenyl)tetrahydro-1H-furo[2,3-*c*][1,2]oxazine-3,3(7aH)-dicarboxylate (3g)**

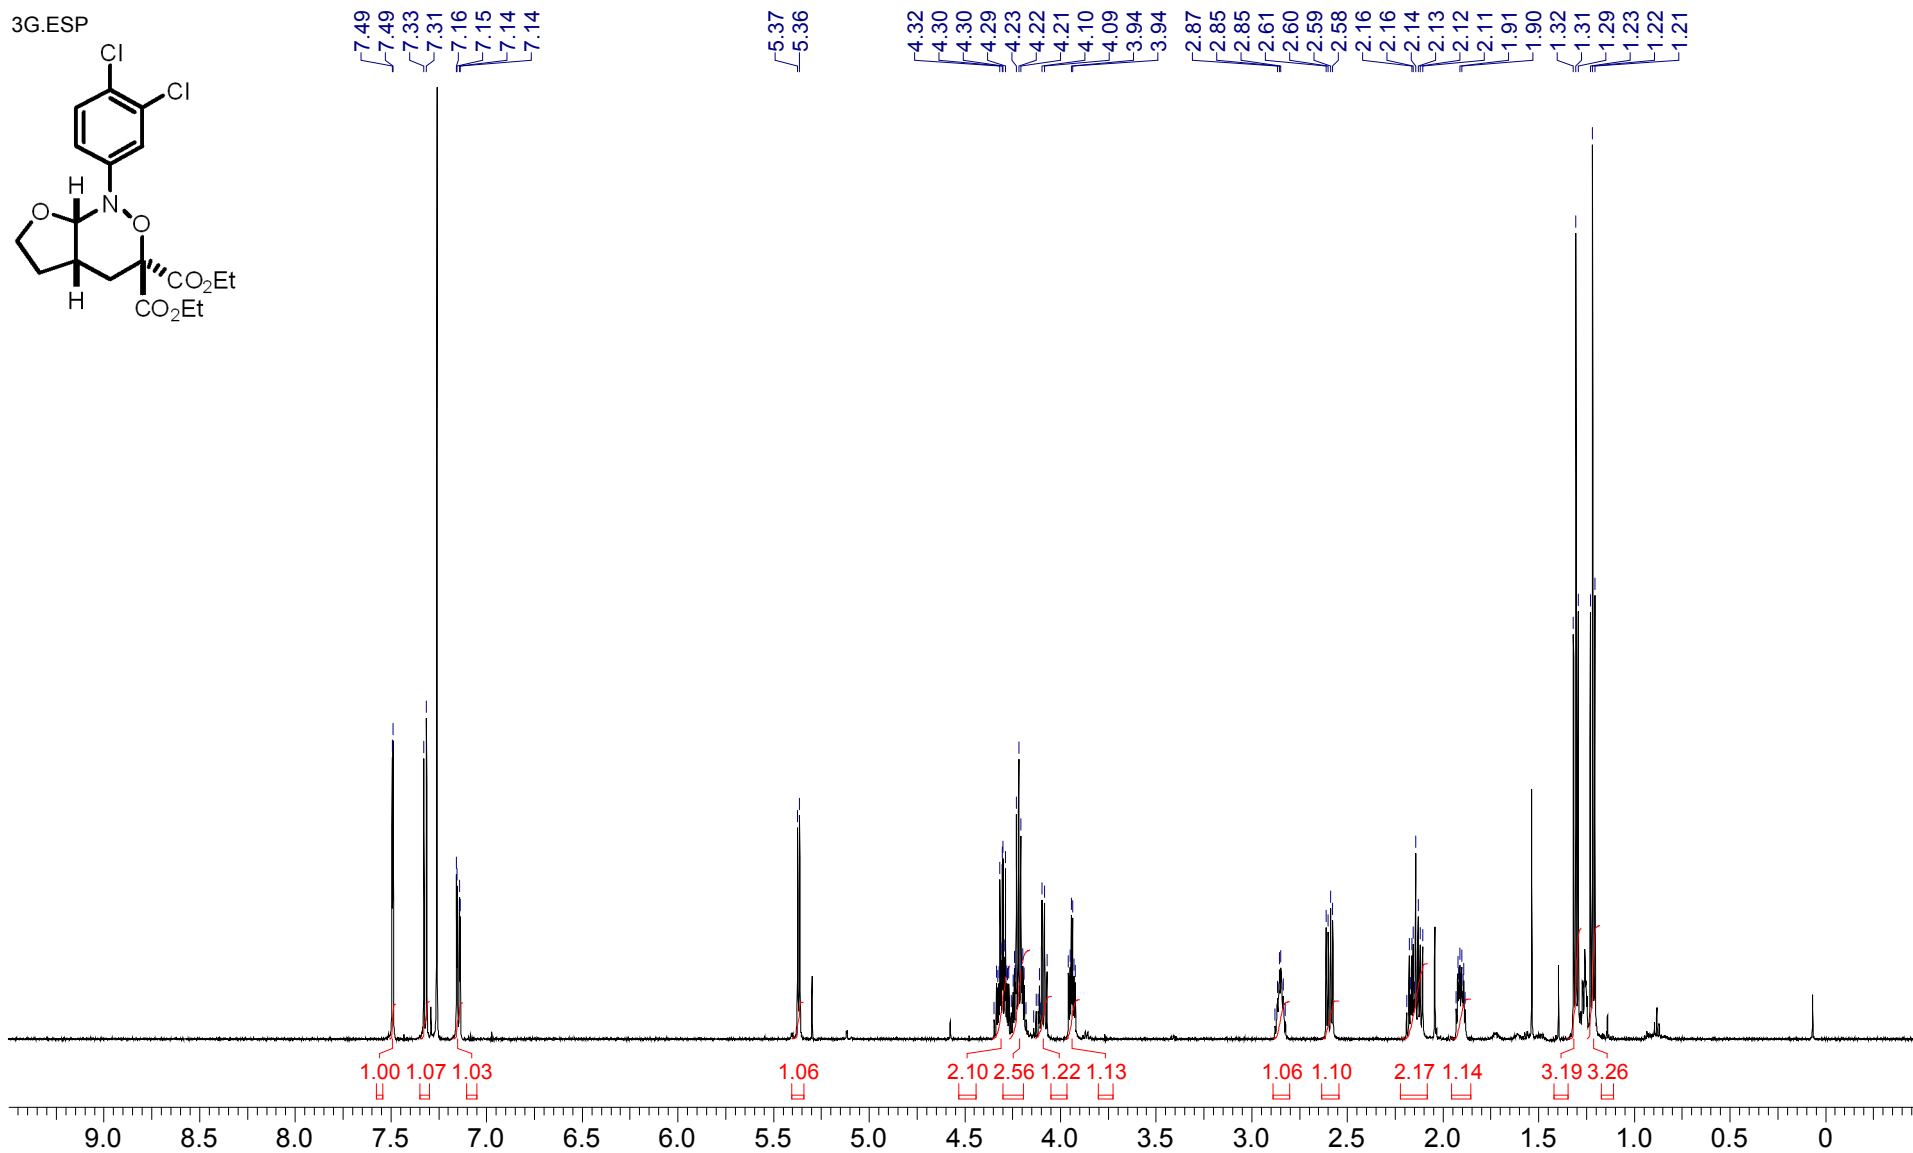

**(4a*S*\*,7a*S*\*)-diethyl 1-(3,4-dichlorophenyl)tetrahydro-1H-furo[2,3-*c*][1,2]oxazine-3,3(7aH)-dicarboxylate (3g)**

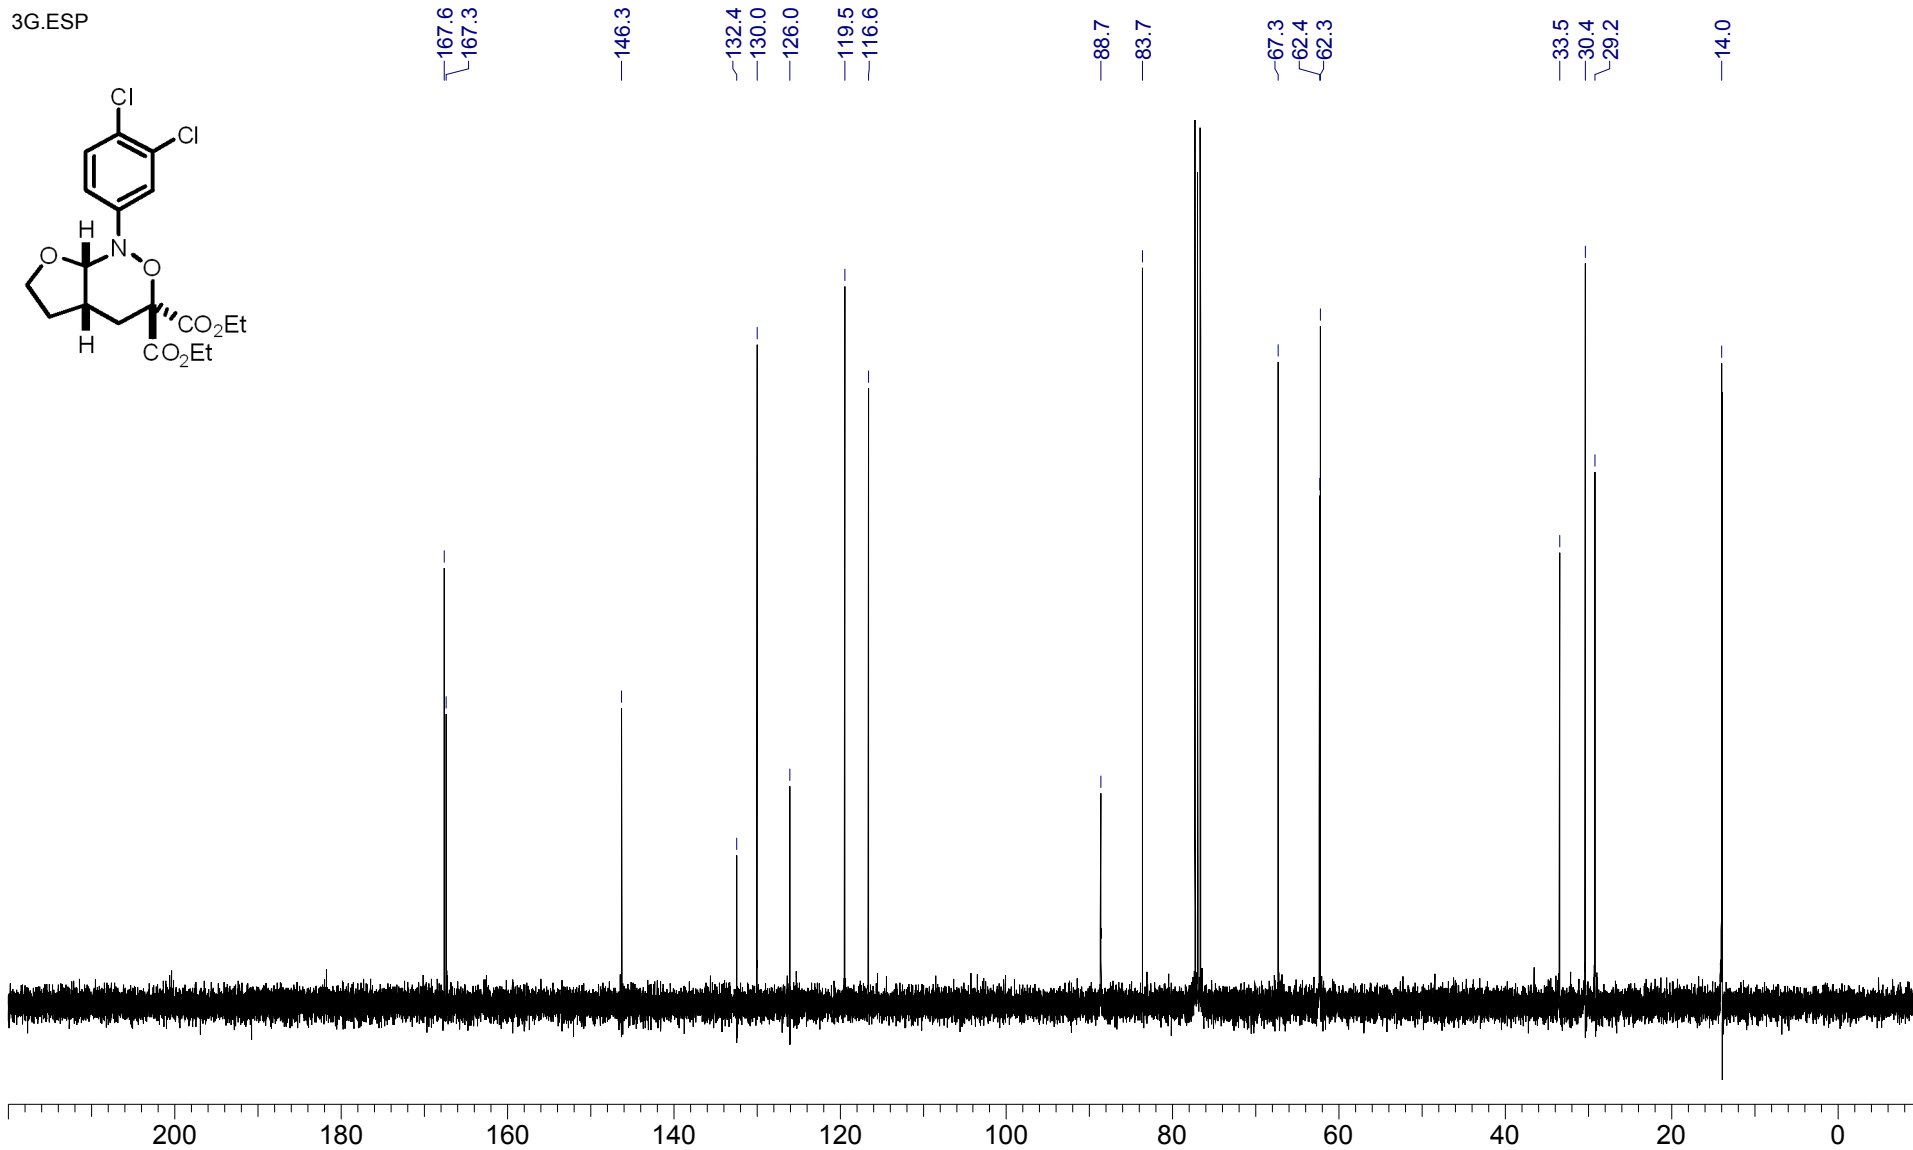

## nOe correlations of 3g

Naresh

Sample Name:  
Naresh  
Data Collected on:  
nmrm400.chem.uwo.ca-mercury400  
Archive directory:  
/home/data/Pagenkopf/Naresh  
Sample directory:  
VN-07-49-P\_Mar\_22\_2013\_01  
FidFile: NOESY\_01

Pulse Sequence: NOESY  
Solvent: cdcl3  
Data collected on: Mar 23 2013

Temp. 25.0 C / 298.1 K  
Sample #28, Operator: Pagenkopf

Relax. delay 1.000 sec  
Acq. time 0.150 sec  
Width 6402.0 Hz  
2D Width 6402.0 Hz  
16 repetitions  
2 x 200 increments  
OBSERVE H1, 400.0802917 MHz  
DATA PROCESSING  
Gauss apodization 0.069 sec  
F1 DATA PROCESSING  
Gauss apodization 0.029 sec  
FT size 2048 x 2048  
Total time 2 hr, 32 min

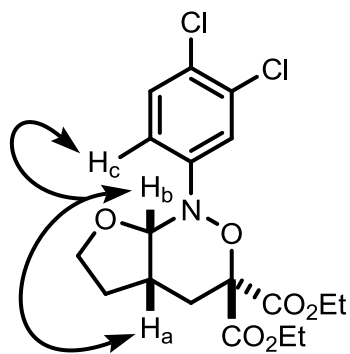

3g

H<sub>a</sub> →

H<sub>b</sub> →

H<sub>c</sub> →

F1  
(ppm)

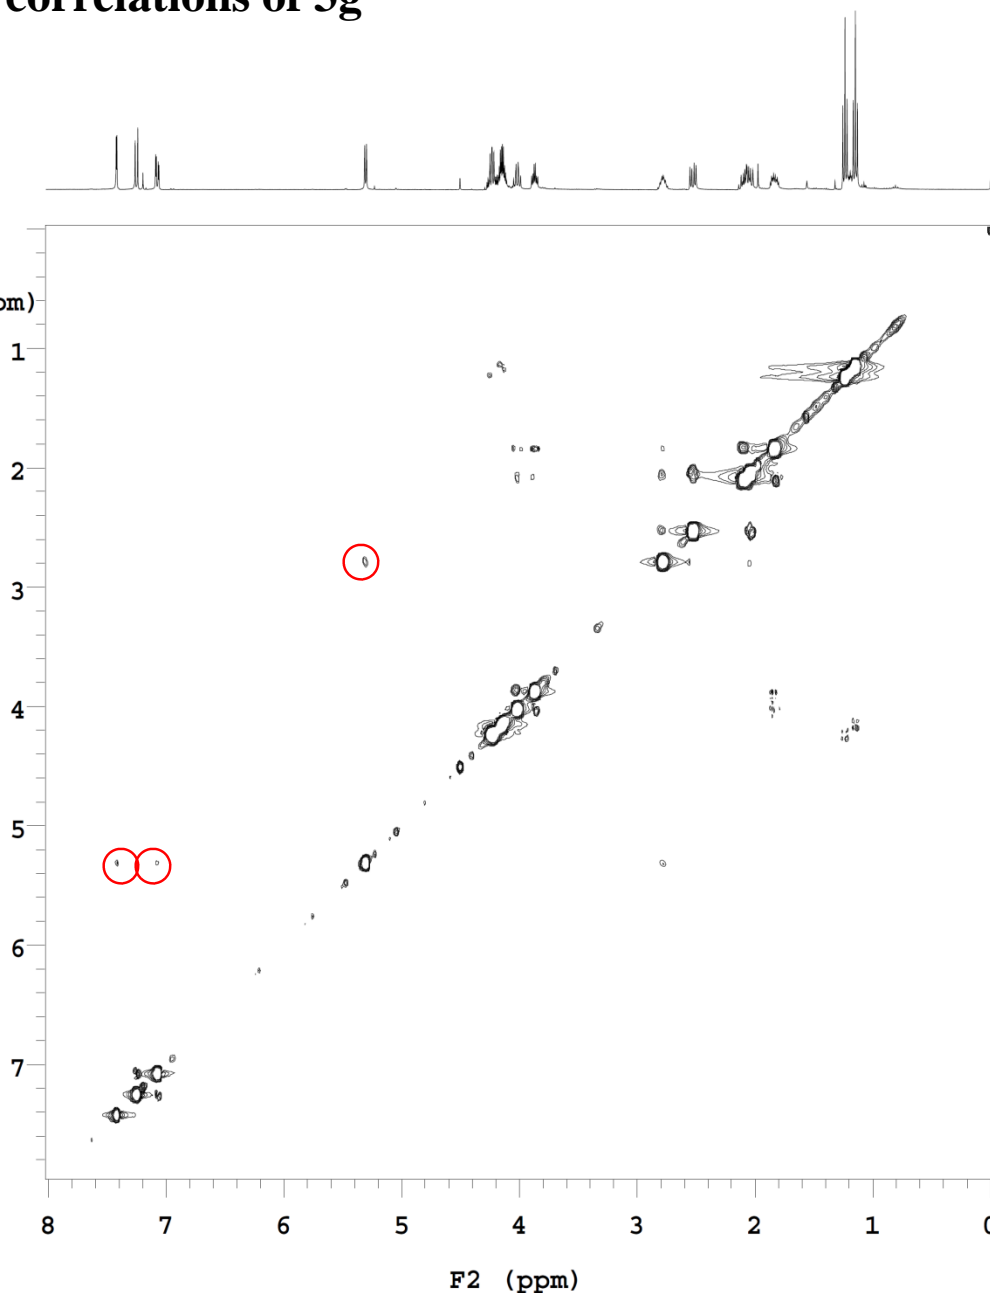

F2 (ppm)

**(4a*S*\*,7a*S*\*)-diethyl 1-(4-acetylphenyl)tetrahydro-1H-furo[2,3-*c*][1,2]oxazine-3,3(7aH)-dicarboxylate (3h)**

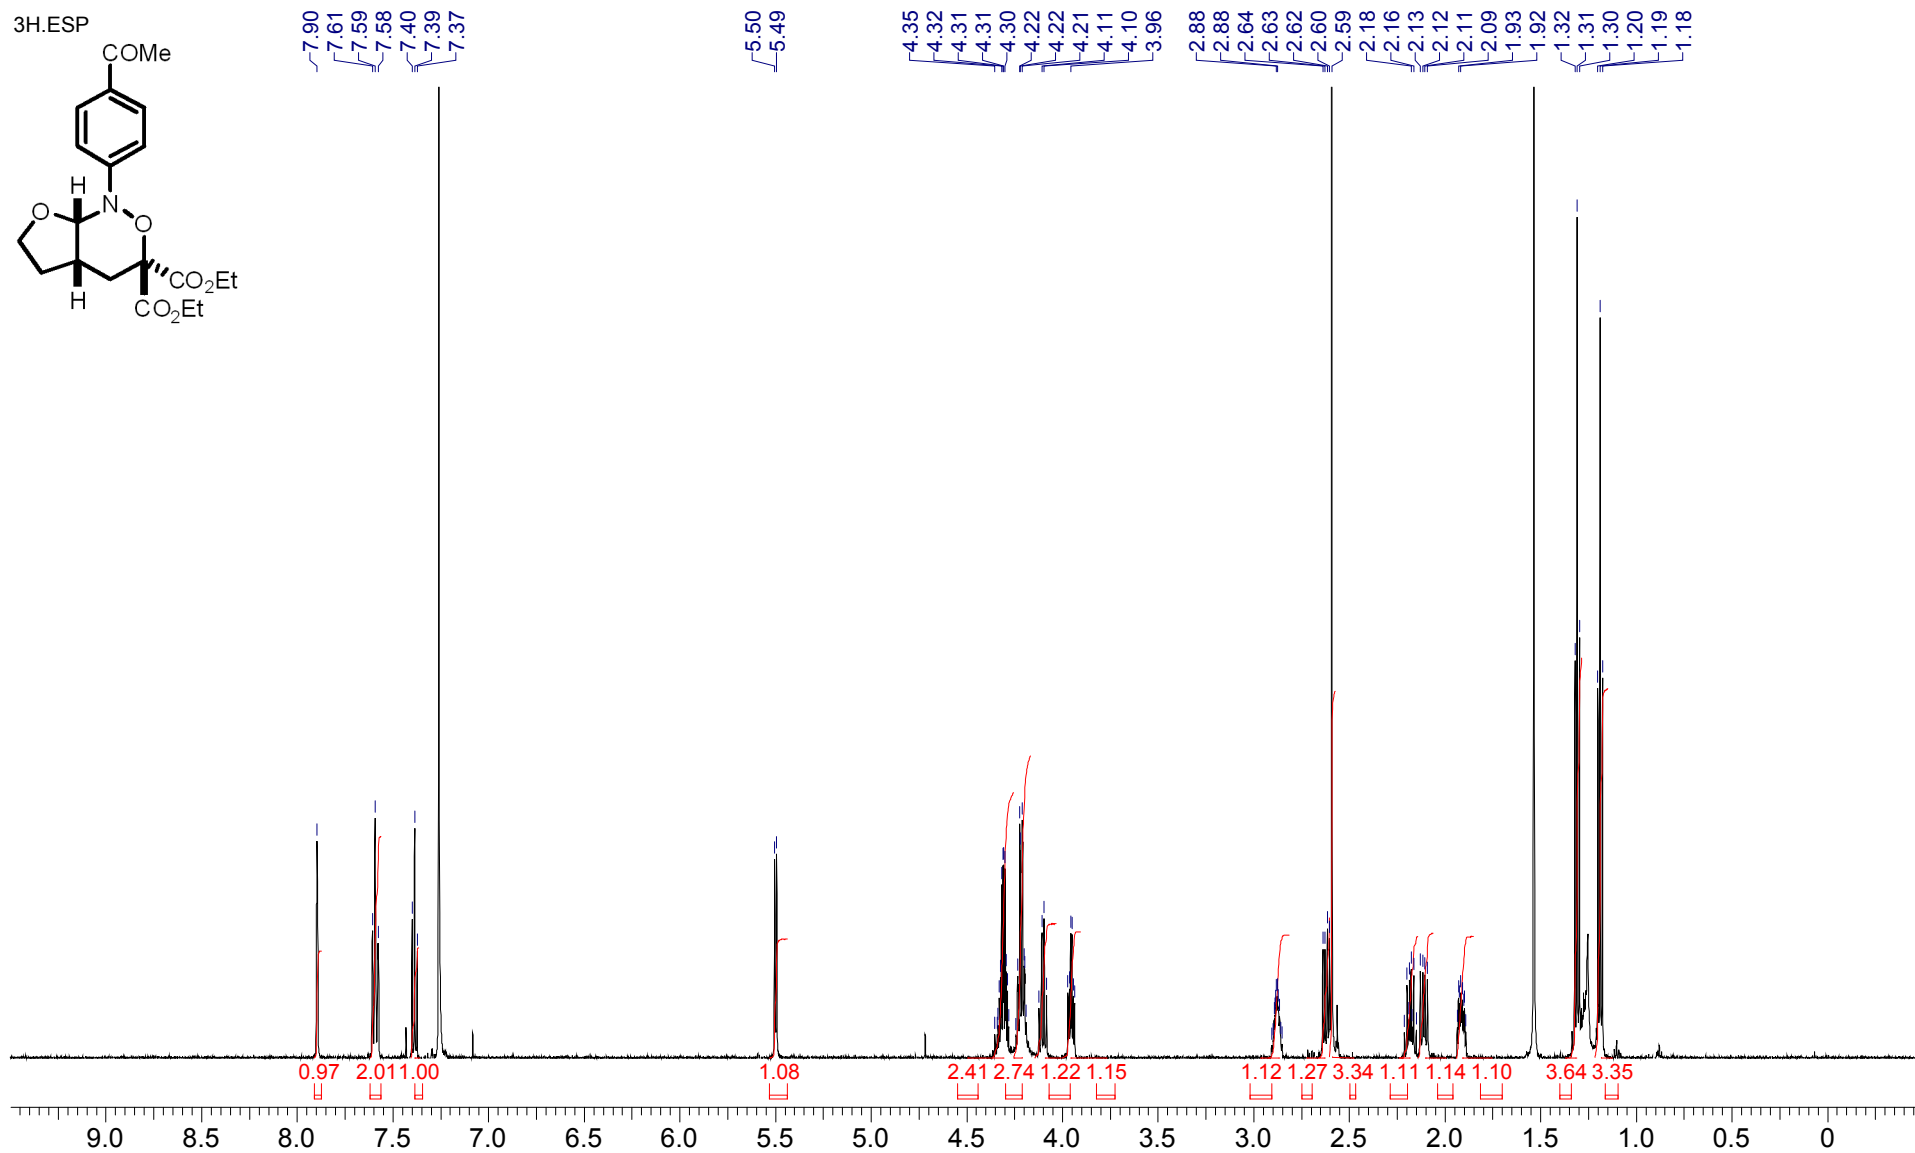



**(4a*S*\*,7a*S*\*)-diethyl 1-(4-acetylphenyl)tetrahydro-1H-furo[2,3-*c*][1,2]oxazine-3,3(7aH)-dicarboxylate (3h)**

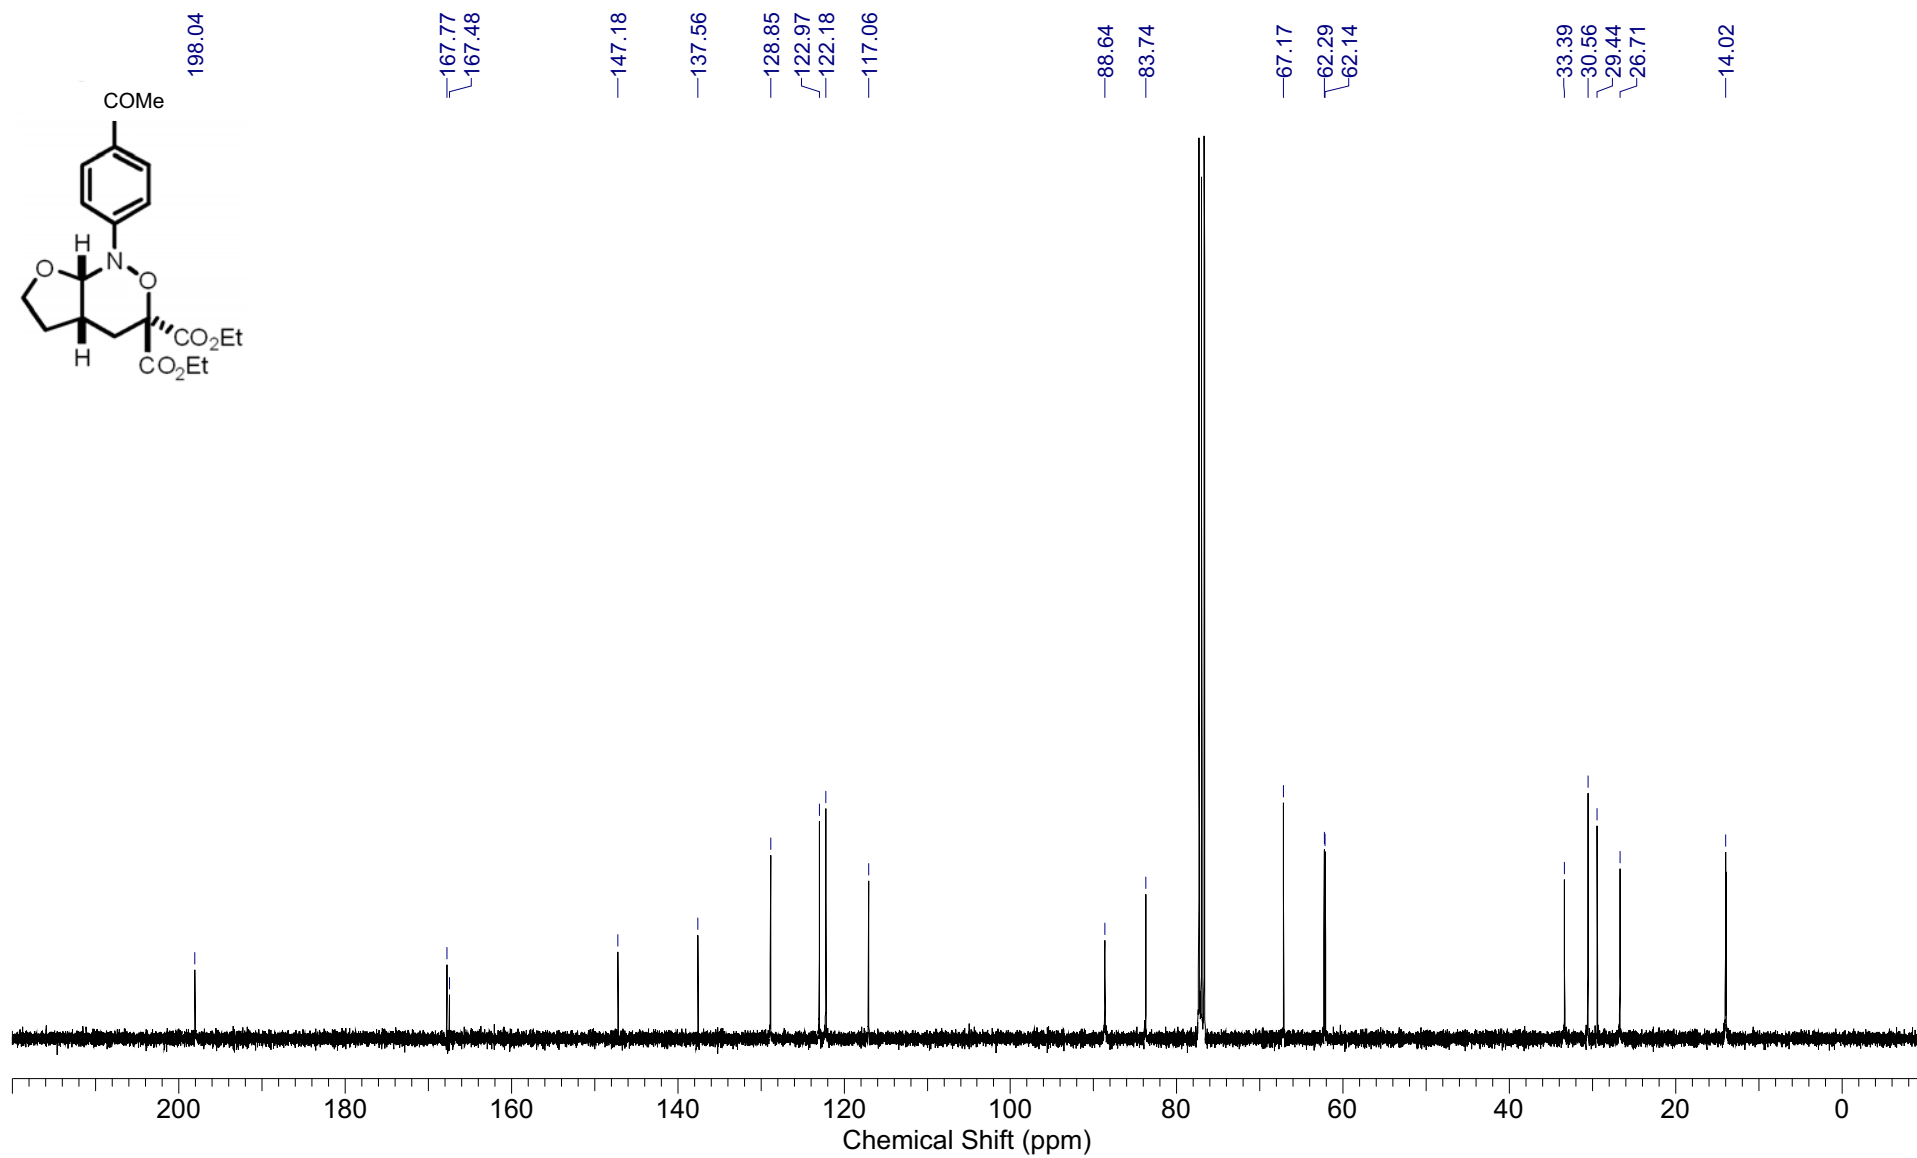

## nOe correlations of 3h

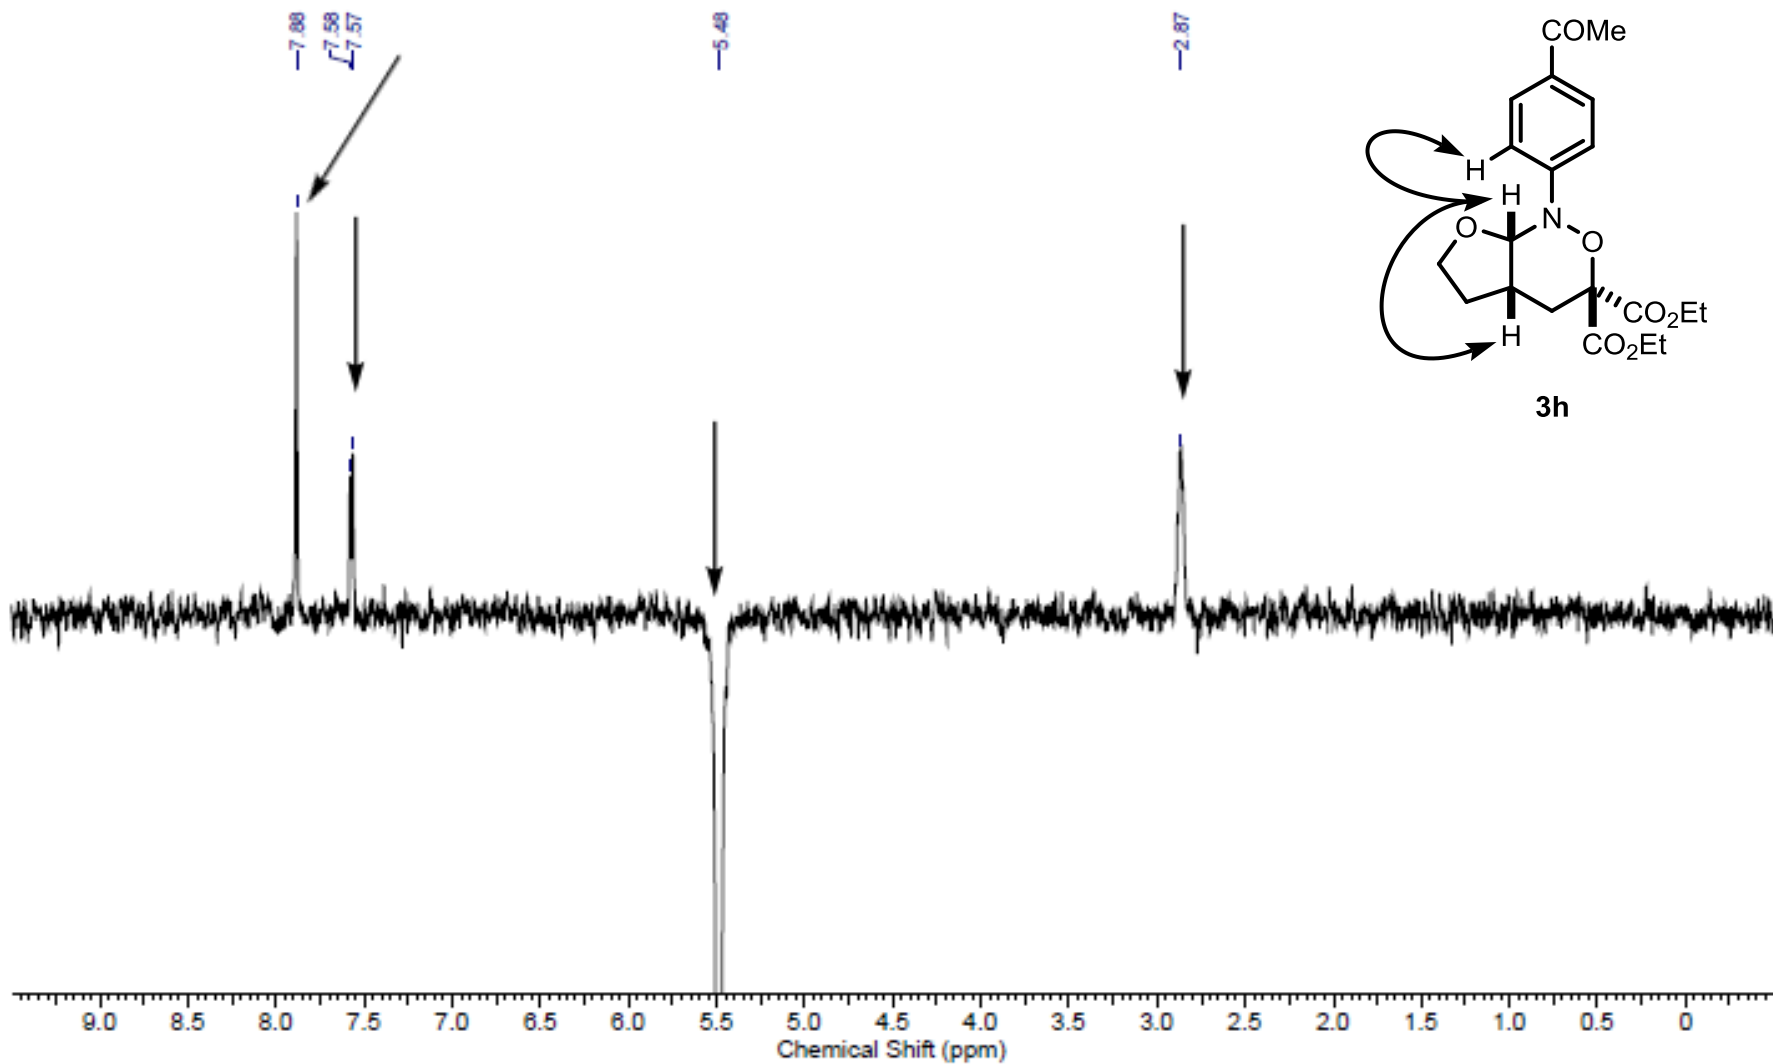

**(4a*S*\*,7a*S*\*)-diethyl 1-(3-acetylphenyl)tetrahydro-1*H*-furo[2,3-*c*][1,2]oxazine-3,3(7a*H*)-dicarboxylate (3i)**

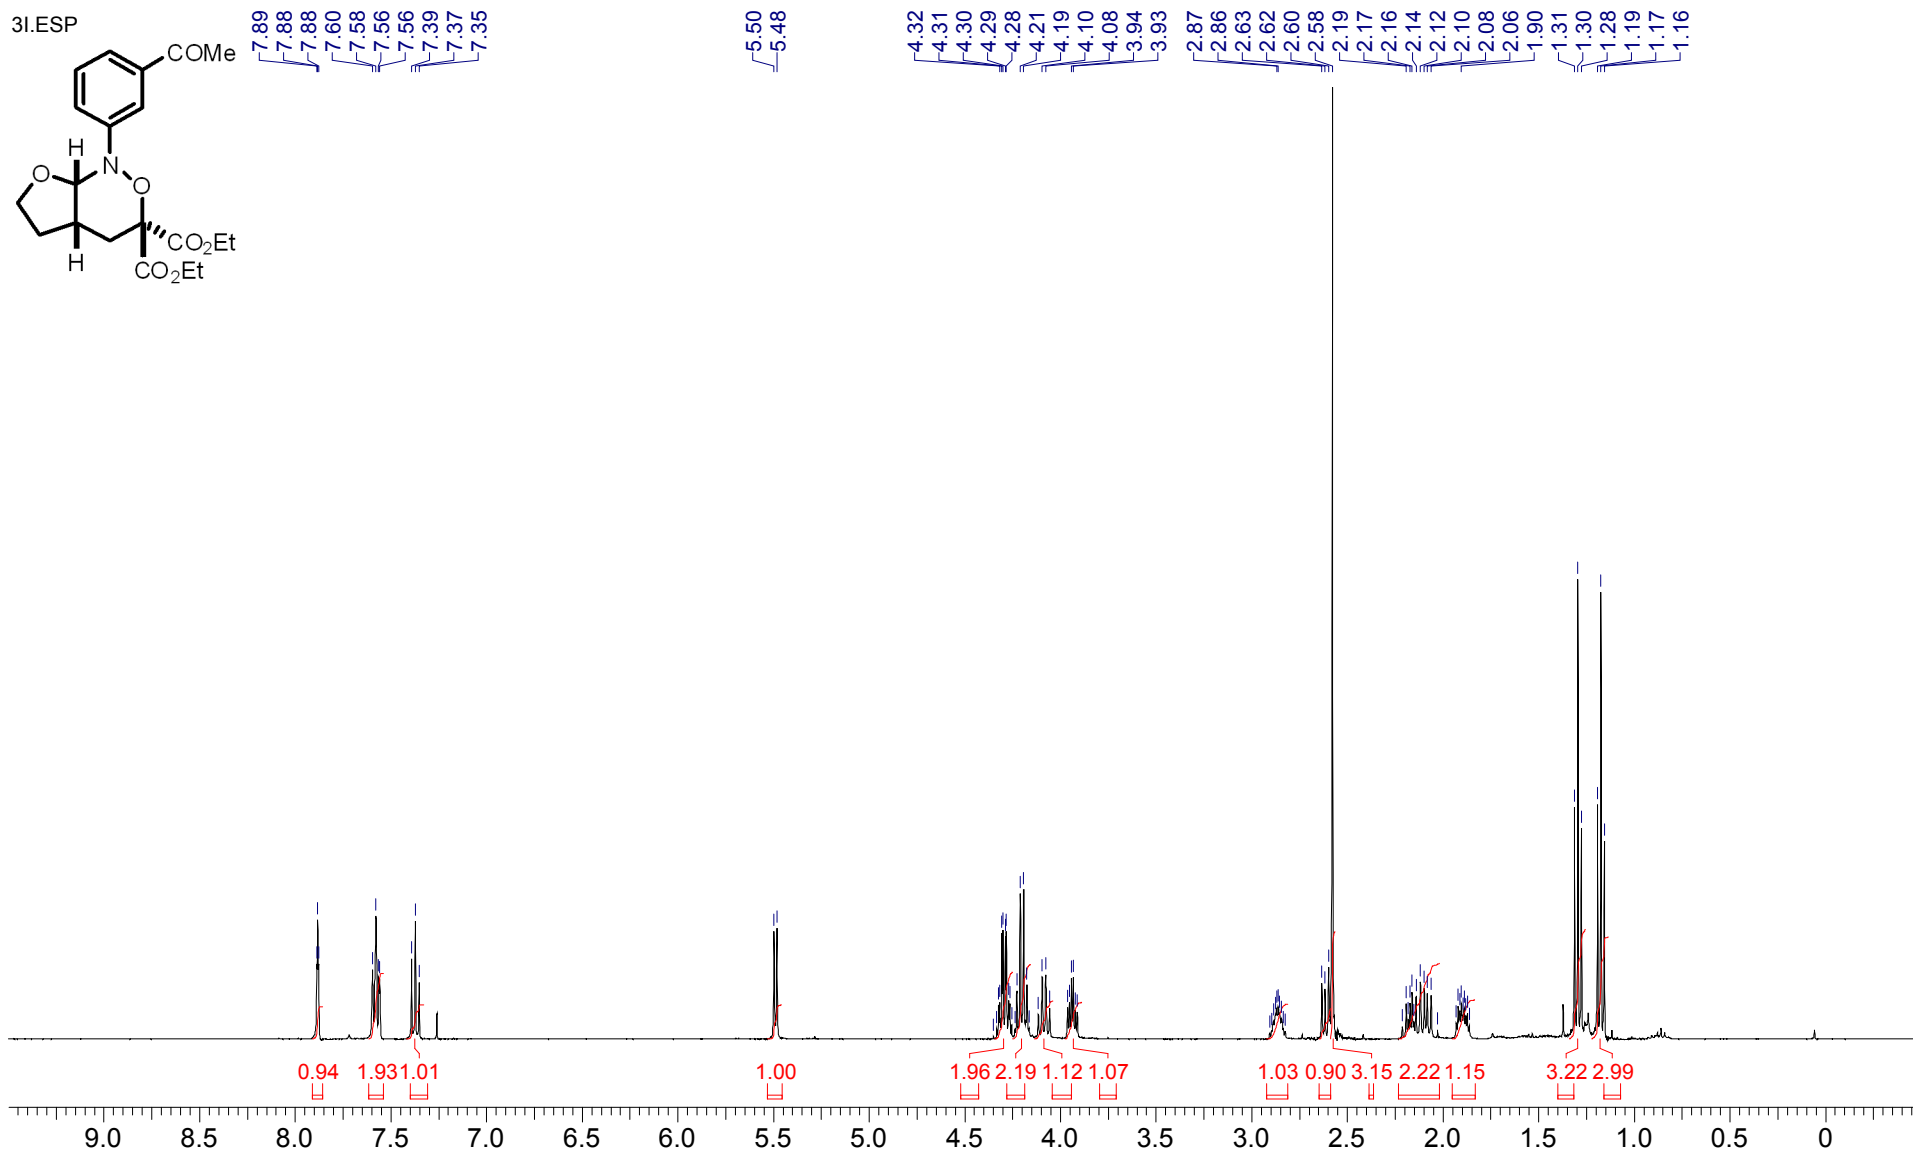

**(4a*S*\*,7a*S*\*)-diethyl 1-(3-acetylphenyl)tetrahydro-1*H*-furo[2,3-*c*][1,2]oxazine-3,3(7a*H*)-dicarboxylate (3i)**

3I.ESP

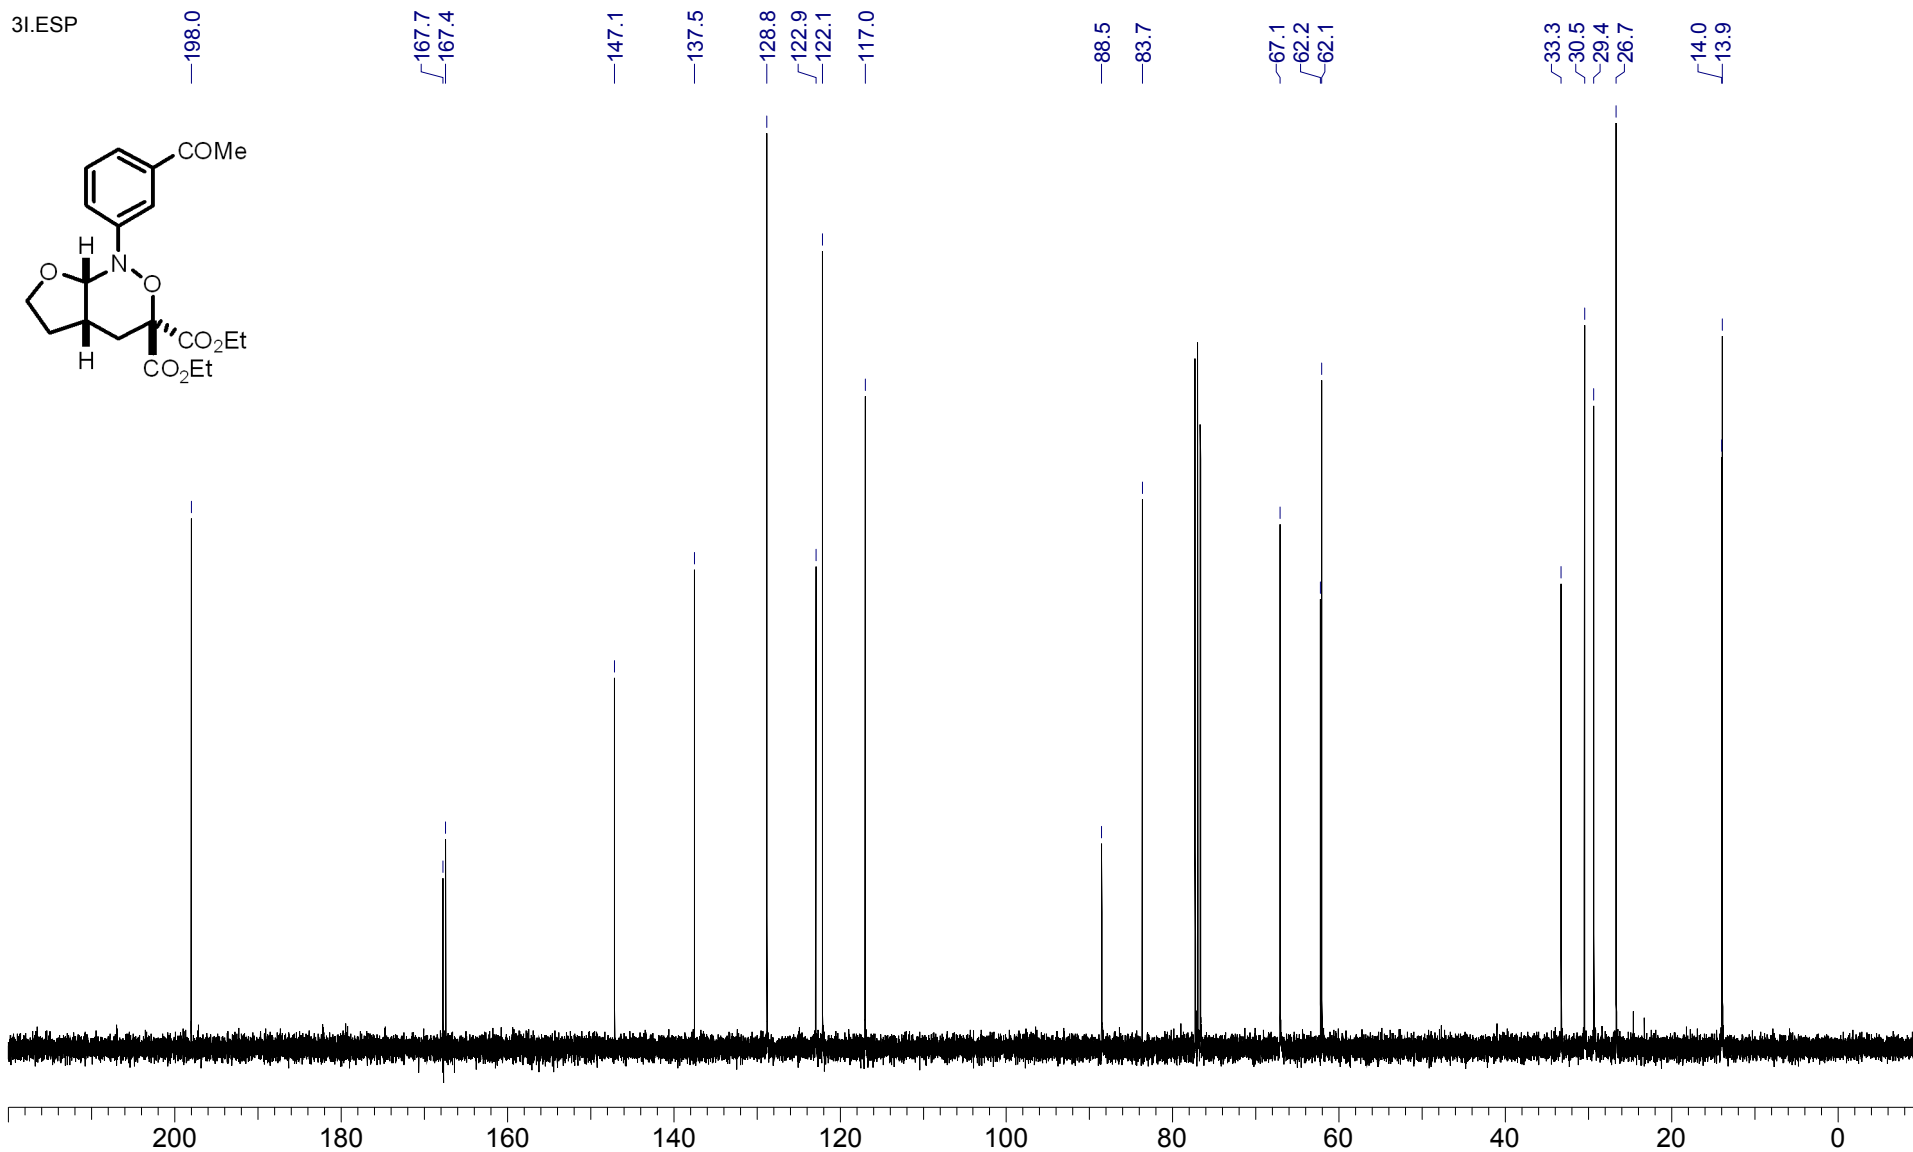

Naresh

## nOe correlations of 3i

Sample Name:  
Naresh  
Data Collected on:  
nmrm400.chem.uwo.ca-mercury400  
Archive directory:  
/home/data/Pagenkopf/Naresh  
Sample directory:  
VN-07-36-P\_Mar\_14\_2013\_01  
FidFile: NOESY\_01

Pulse Sequence: NOESY  
Solvent: cdcl3  
Data collected on: Mar 14 2013

Temp. 25.0 C / 298.1 K  
Sample #44, Operator: Pagenkopf

Relax. delay 1.000 sec  
Acq. time 0.150 sec  
Width 6402.0 Hz  
2D Width 6402.0 Hz  
16 repetitions  
2 x 200 increments  
OBSERVE H1, 400.0802686 MHz  
DATA PROCESSING  
Gauss apodization 0.069 sec  
F1 DATA PROCESSING  
Gauss apodization 0.029 sec  
FT size 2048 x 2048  
Total time 2 hr, 32 min

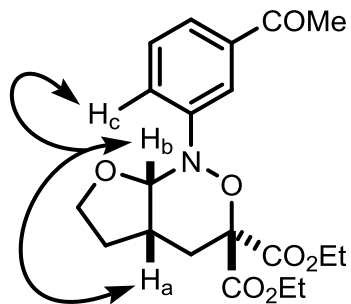

3i

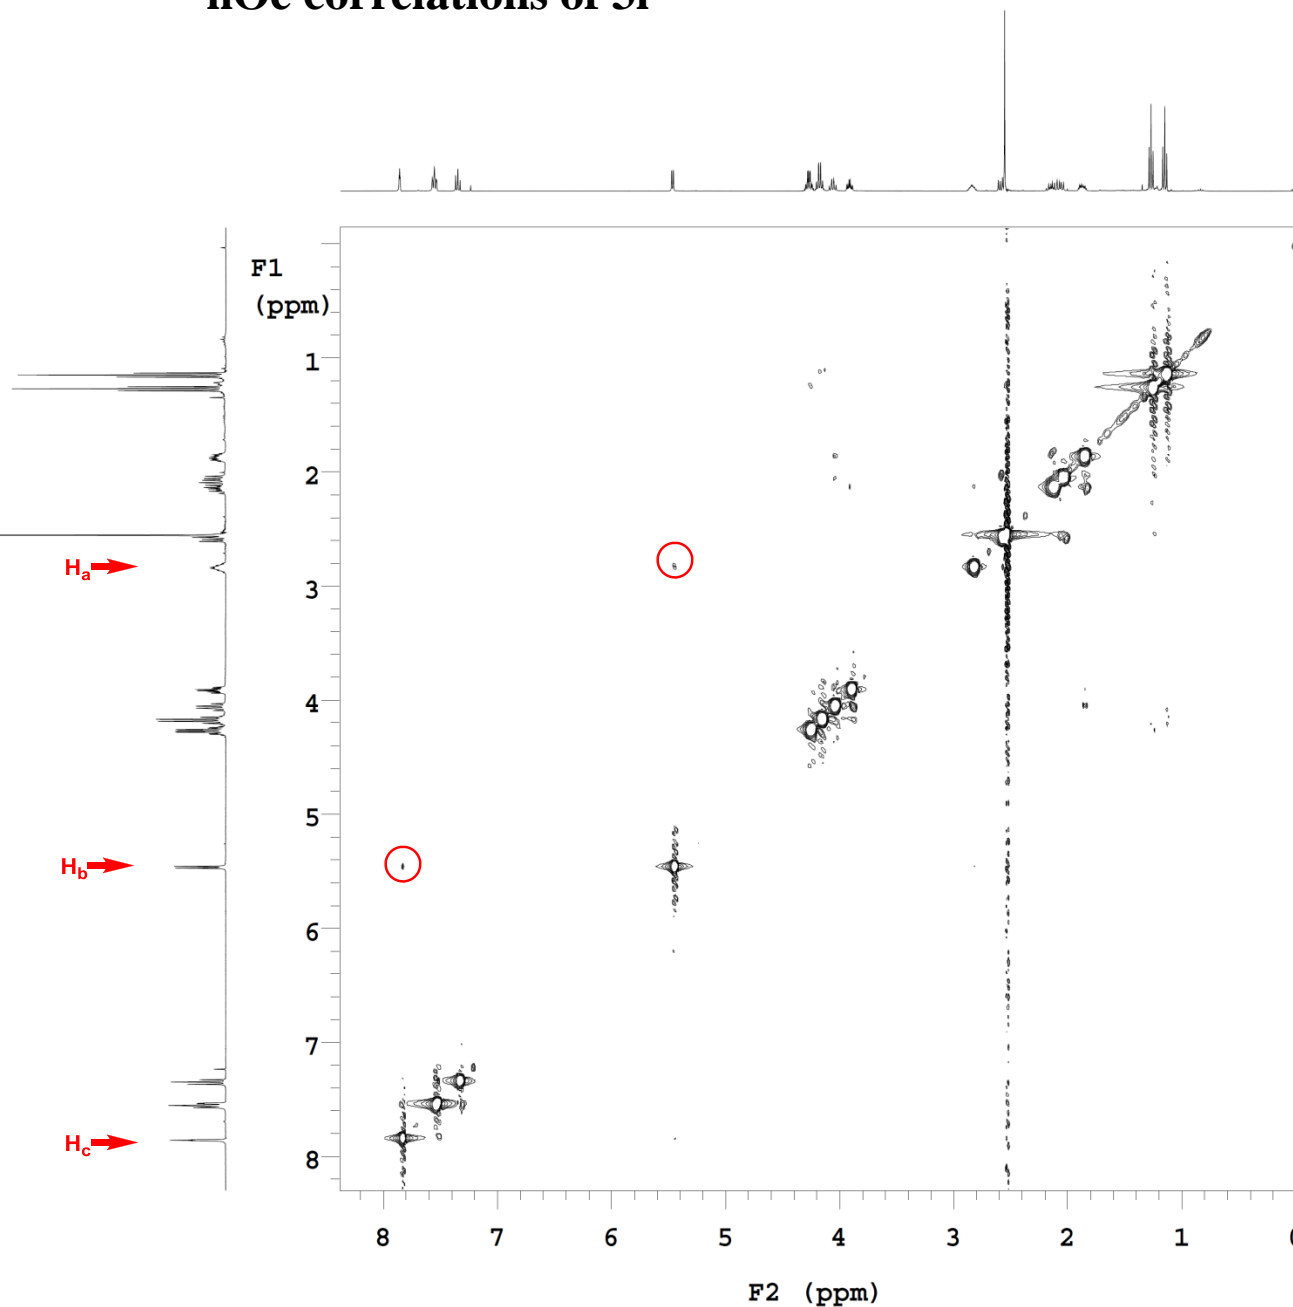

**(4a*S*\*,7a*S*\*)-diethyl 1-(4-(ethoxycarbonyl)phenyl)tetrahydro-1H-furo[2,3-*c*][1,2]oxazine-3,3(7aH)-dicarboxylate (3j)**

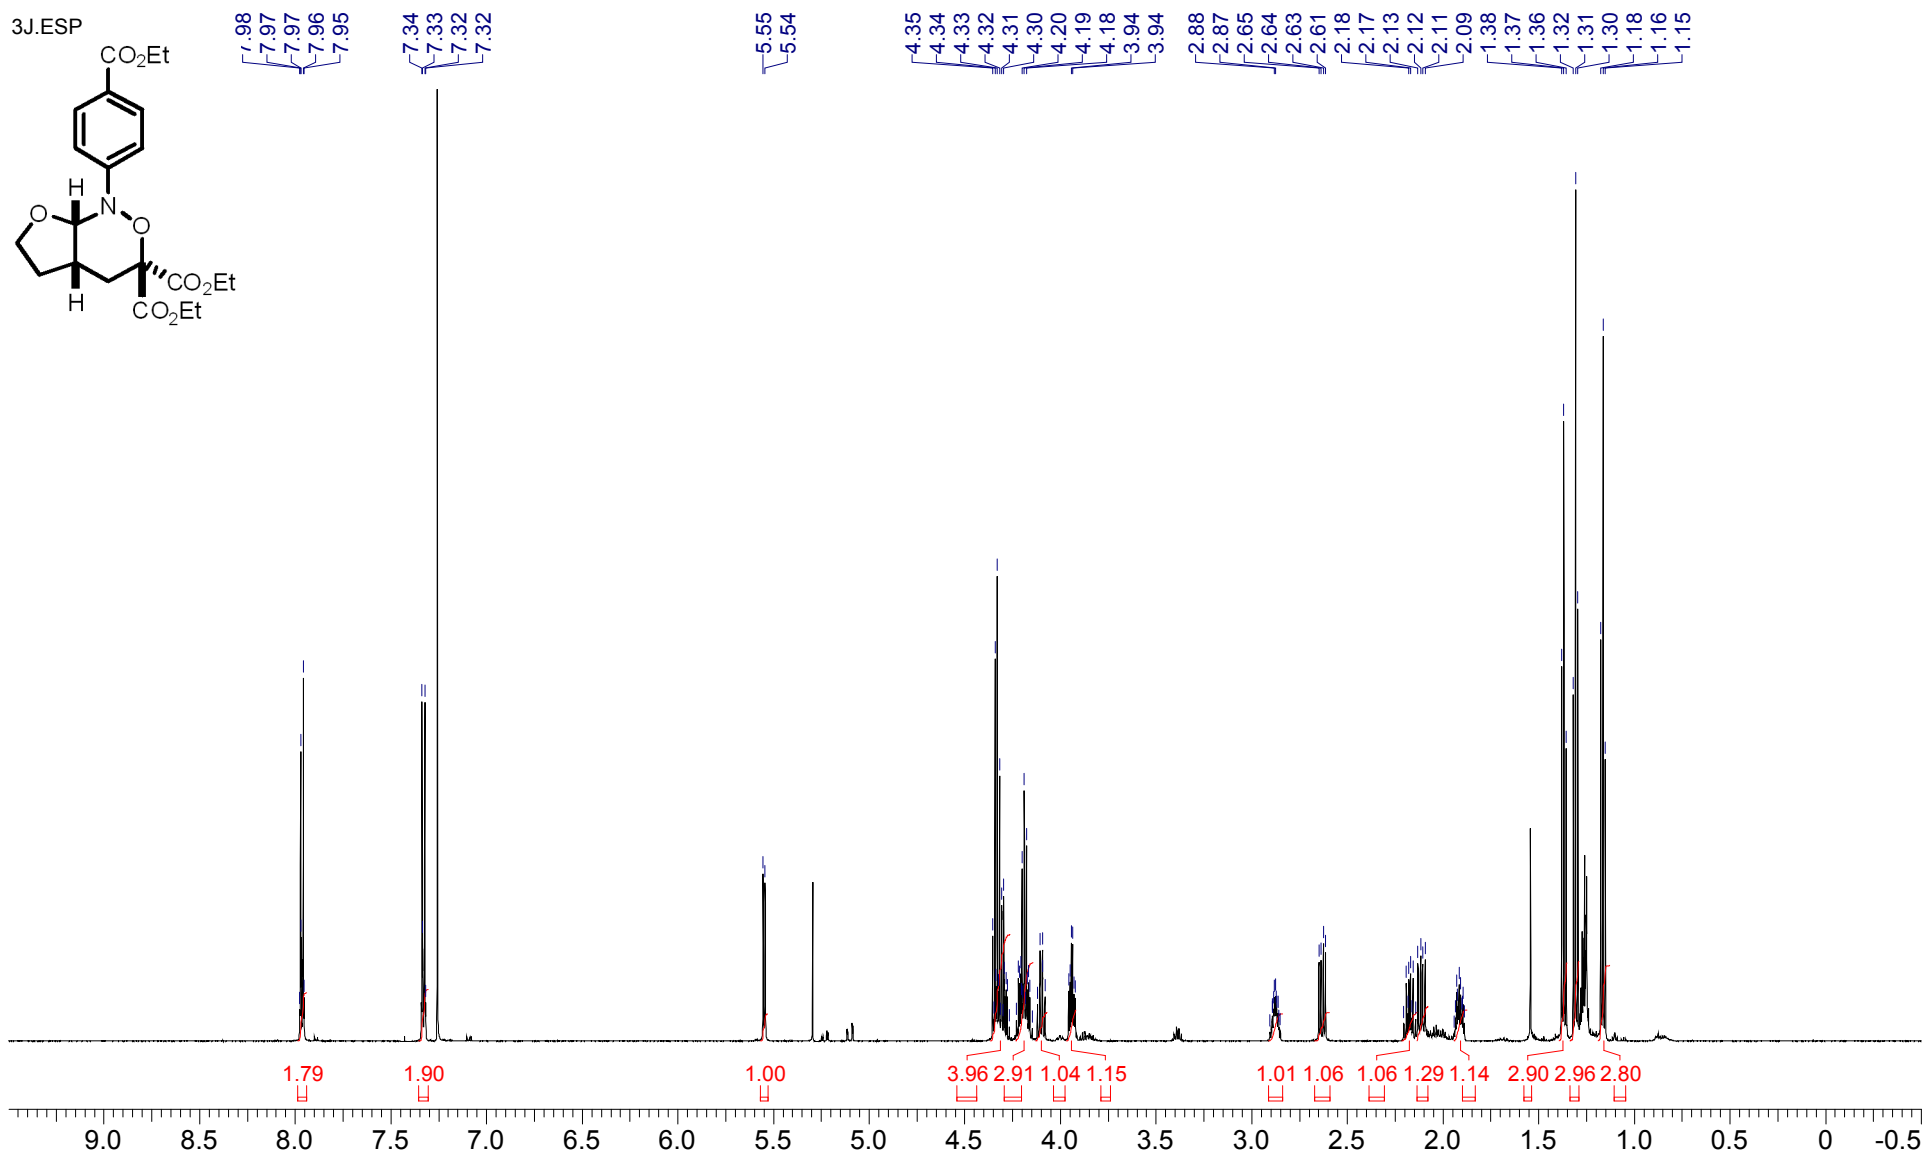

**(4a*S*\*,7a*S*\*)-diethyl 1-(4-(ethoxycarbonyl)phenyl)tetrahydro-1H-furo[2,3-*c*][1,2]oxazine-3,3(7aH)-dicarboxylate (3j)**

3J.ESP

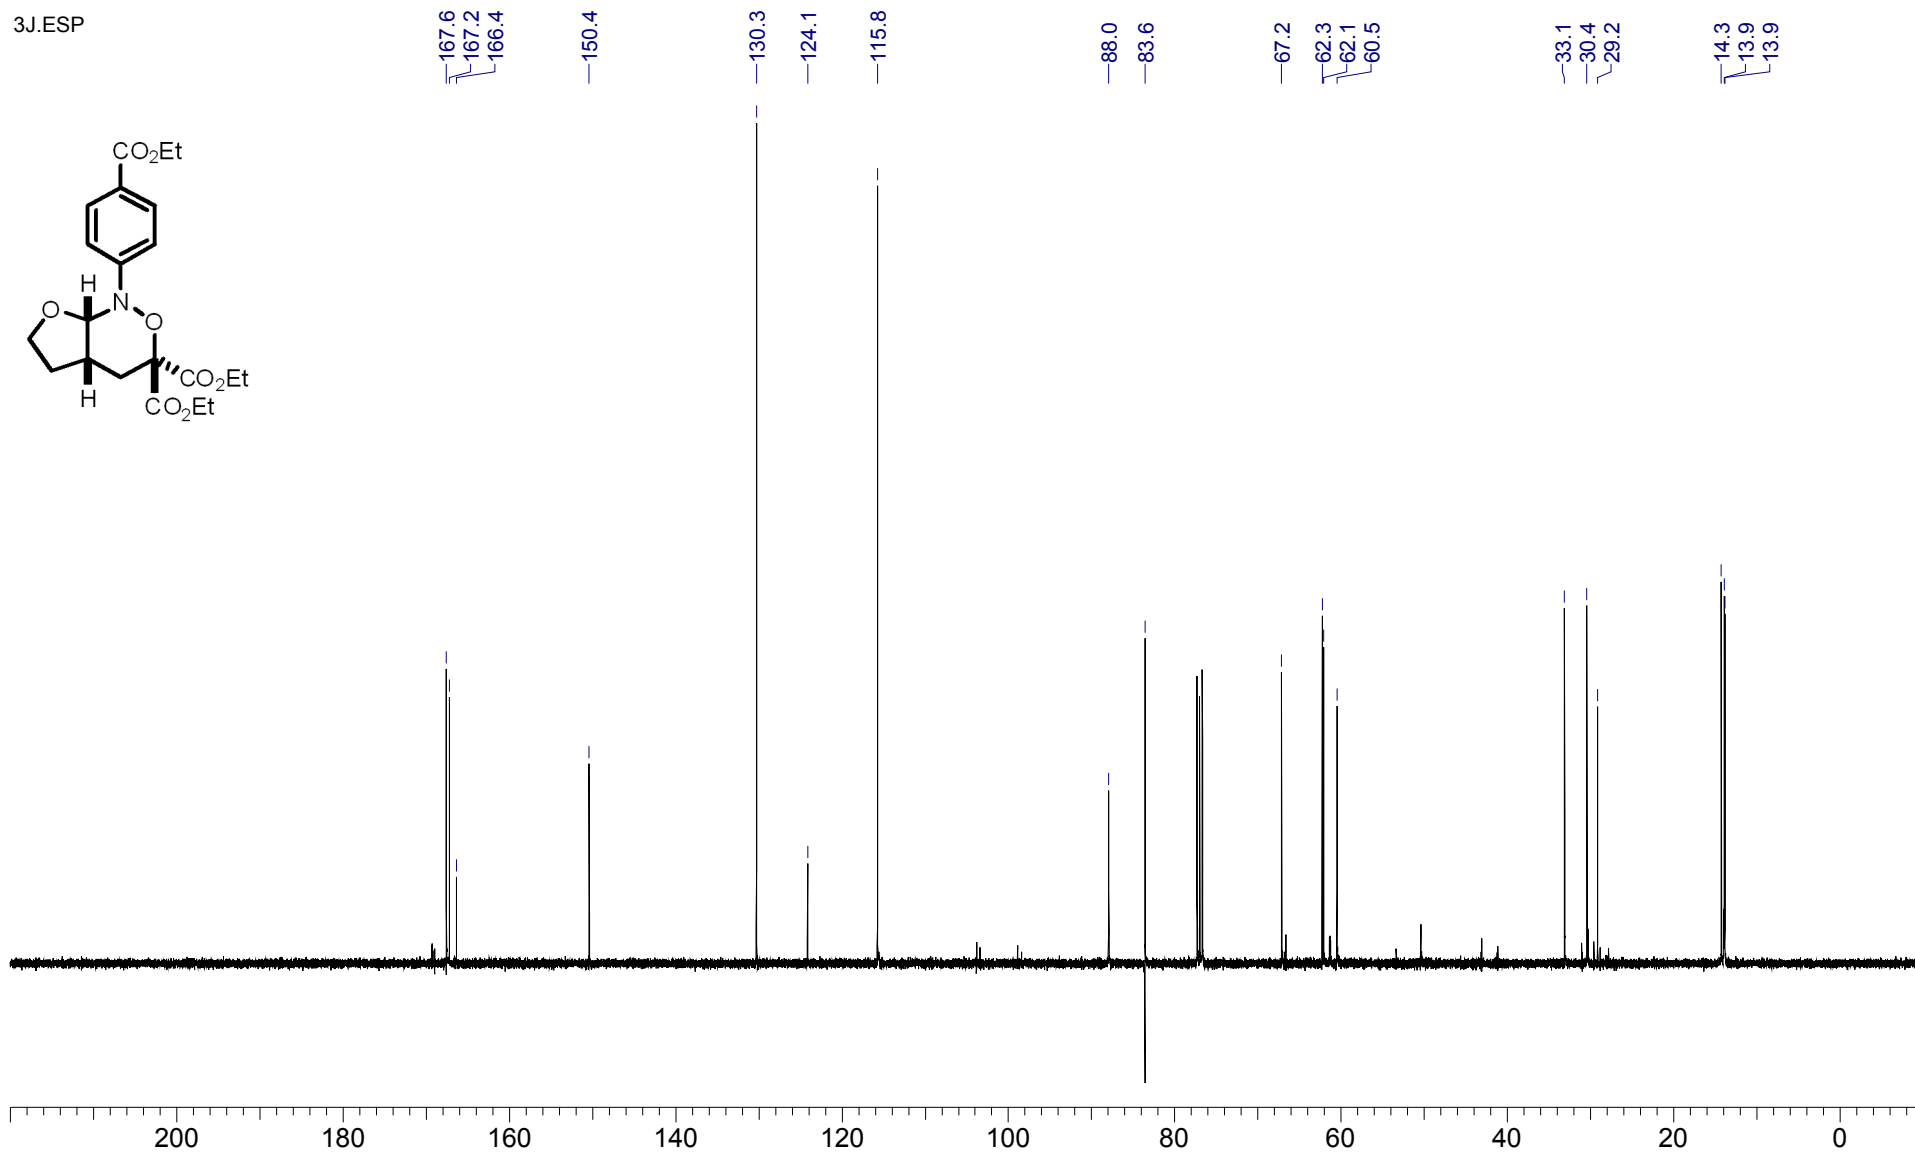

## nOe correlations of 3j

Sample Name:

Naresh

Data Collected on:

nmr-m400.chem.uwo.ca-mercury400

Archive directory:

/home/data/Pagenkopf/Naresh

Sample directory:

VN-01-33-P-2013.09.27\_01

FidFile: NOESY\_VN-01-33-P\_01

Pulse Sequence: NOESY

Solvent: cdcl3

Data collected on: Sep 28 2013

Temp. 25.0 C / 298.1 K

Sample #28, Operator: Pagenkopf

Relax. delay 1.000 sec

Acq. time 0.150 sec

Width 4103.4 Hz

2D Width 4103.4 Hz

16 repetitions

2 x 200 increments

OBSERVE H1, 400.0802686 MHz

DATA PROCESSING

Gauss apodization 0.069 sec

F1 DATA PROCESSING

Gauss apodization 0.045 sec

FT size 2048 x 2048

Total time 2 hr, 33 min

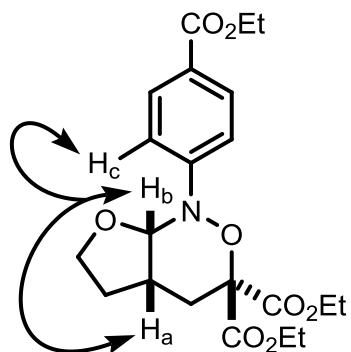

3j

$H_a$  →

$H_b$  →

$H_c$  →

F1  
(ppm)

1

2

3

4

5

6

7

8

F2 (ppm)

8

7

6

5

4

3

2

1

0

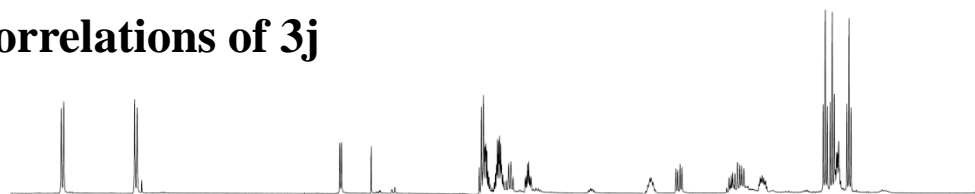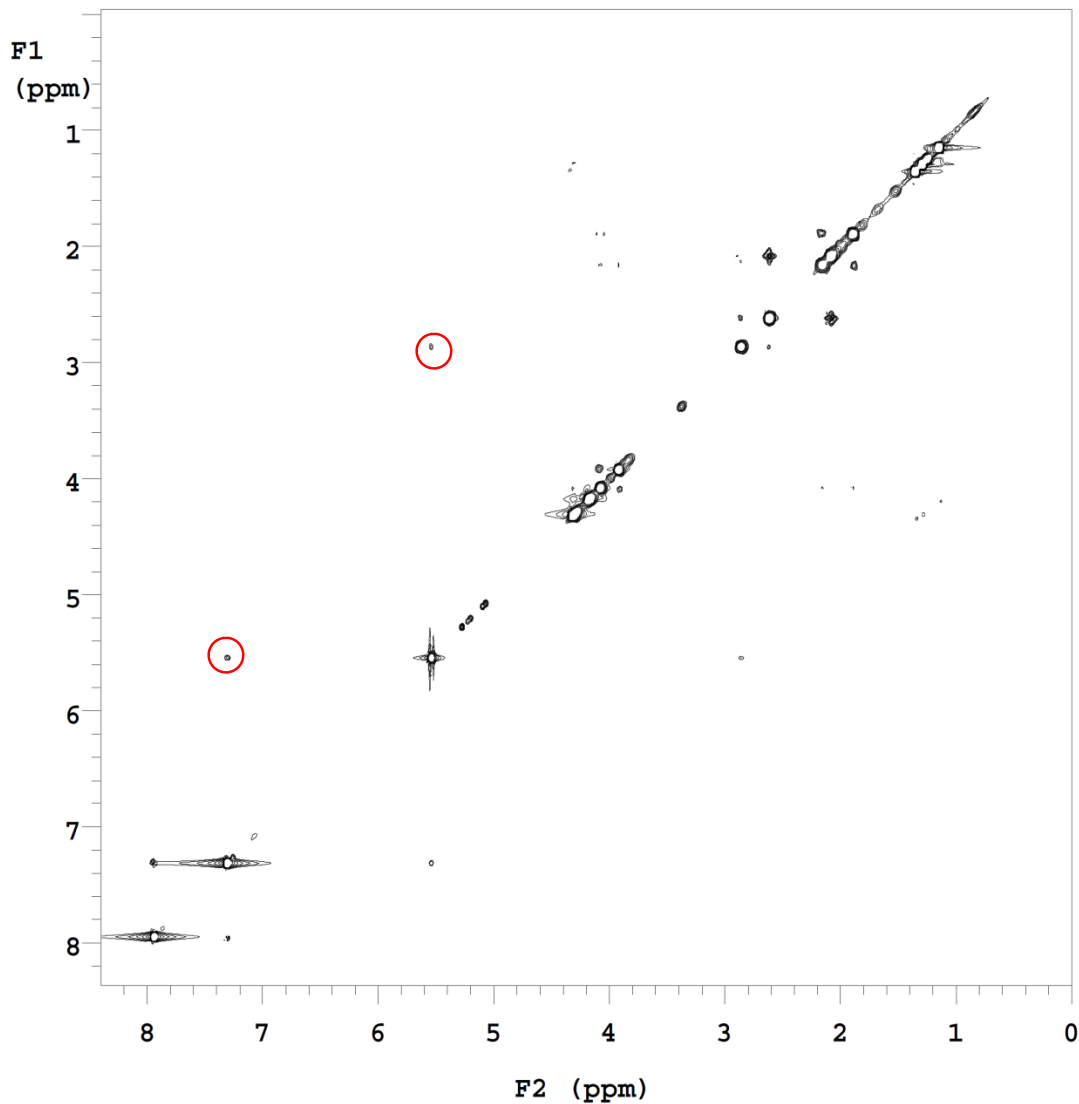



**(4a*S*\*,7a*S*\*)-diethyl 1-(4-cyanophenyl)tetrahydro-1H-furo[2,3-*c*][1,2]oxazine-3,3(7aH)-dicarboxylate (3k)**

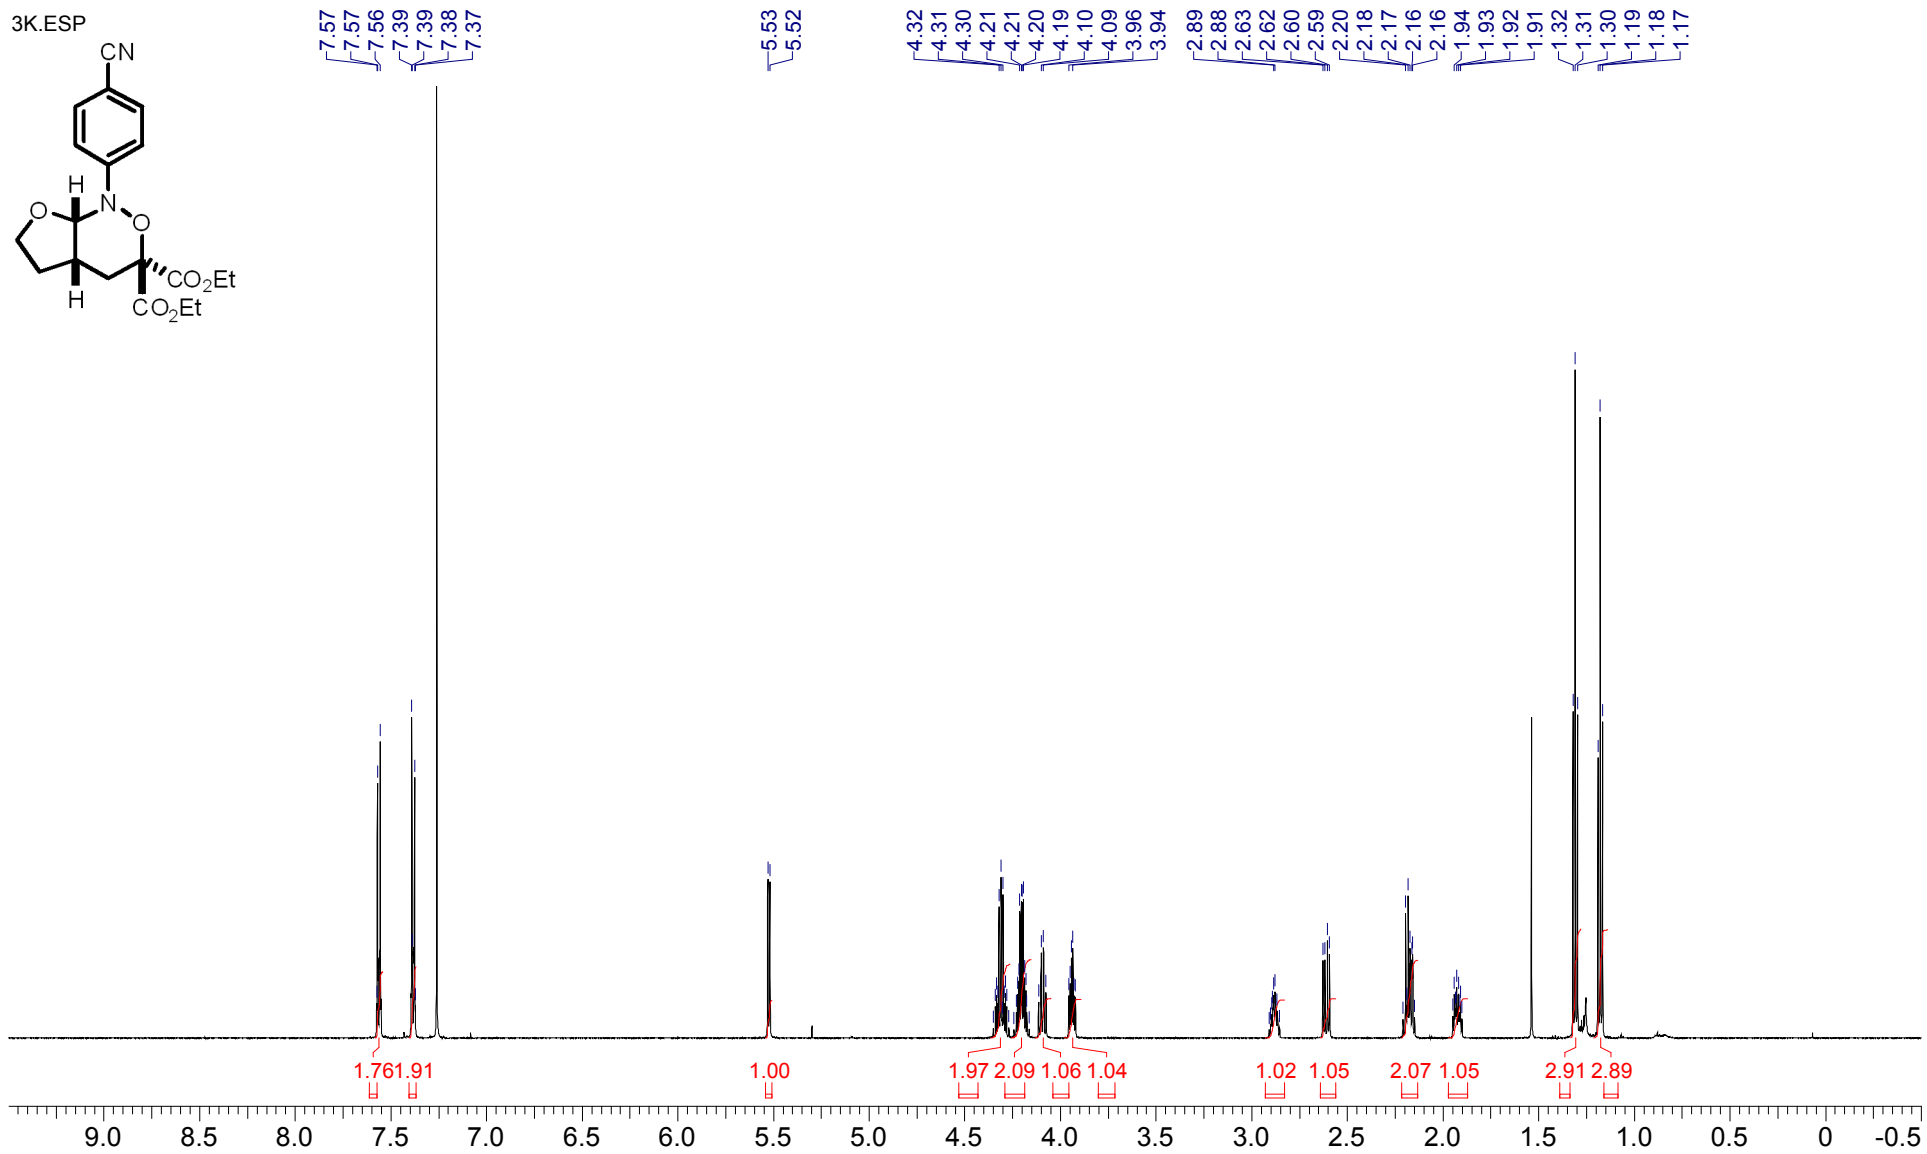

**(4a*S*\*,7a*S*\*)-diethyl 1-(4-cyanophenyl)tetrahydro-1H-furo[2,3-*c*][1,2]oxazine-3,3(7aH)-dicarboxylate (3k)**

3K.ESP

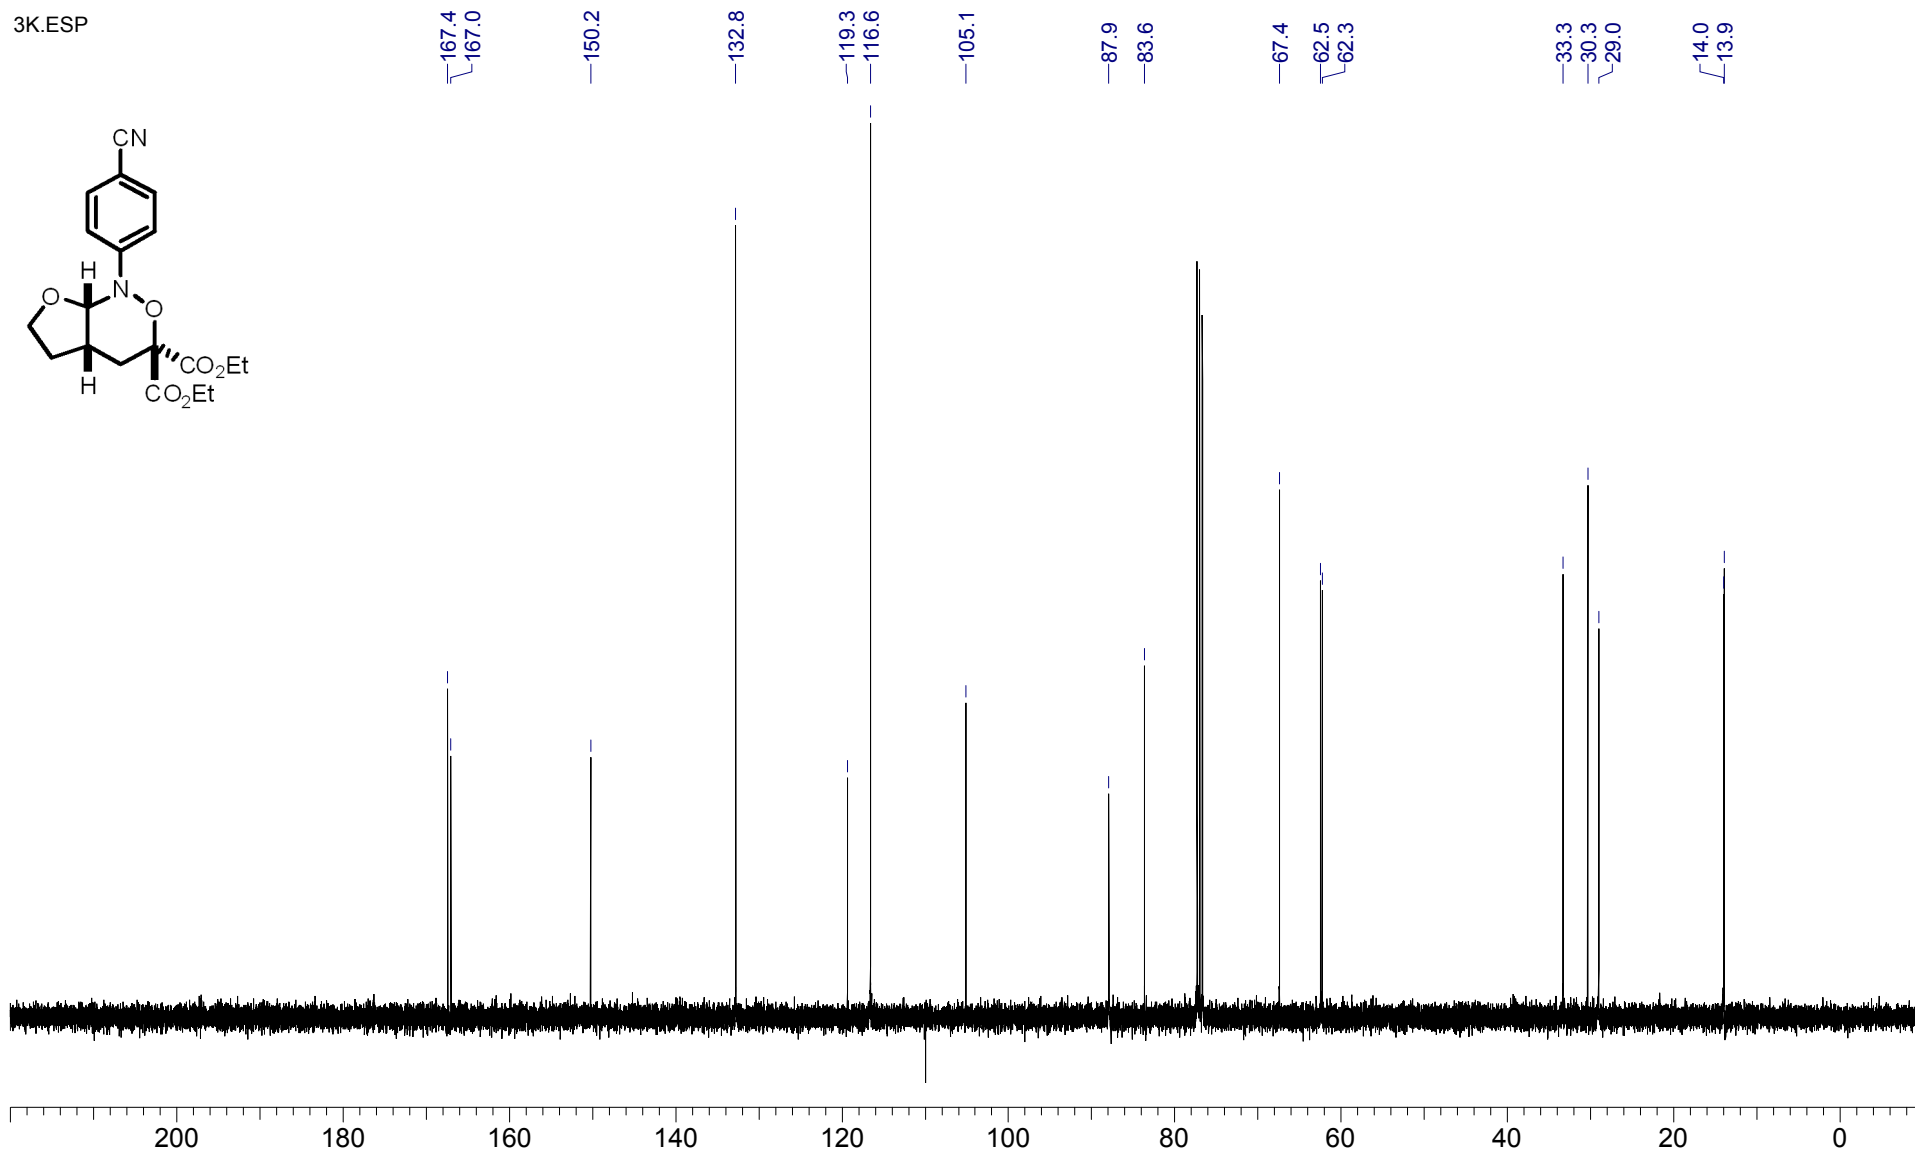

## nOe correlations of 3k

Naresh

Sample Name:

Naresh

Data Collected on:

nmr-m400.chem.uwo.ca-mercury400

Archive directory:

/home/data/Pagenkopf/Naresh

Sample directory:

VN-08-62-P-2013.09.22\_01

FidFile: NOESY\_VN-08-62-P\_01

Pulse Sequence: NOESY

Solvent: cdcl3

Data collected on: Sep 22 2013

Temp. 25.0 C / 298.1 K

Sample #4, Operator: Pagenkopf

Relax. delay 1.000 sec

Acq. time 0.150 sec

Width 3897.1 Hz

2D Width 3897.1 Hz

16 repetitions

2 x 200 increments

OBSERVE H1, 400.0802686 MHz

DATA PROCESSING

Gauss apodization 0.069 sec

F1 DATA PROCESSING

Gauss apodization 0.047 sec

FT size 2048 x 2048

Total time 2 hr, 33 min

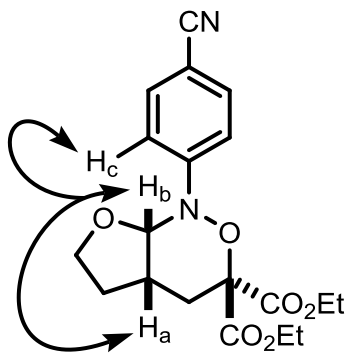

3k

H<sub>a</sub> →

H<sub>b</sub> →

H<sub>c</sub> →

F1  
(ppm)

1

2

3

4

5

6

7

7

6

5

4

3

2

1

0

F2 (ppm)

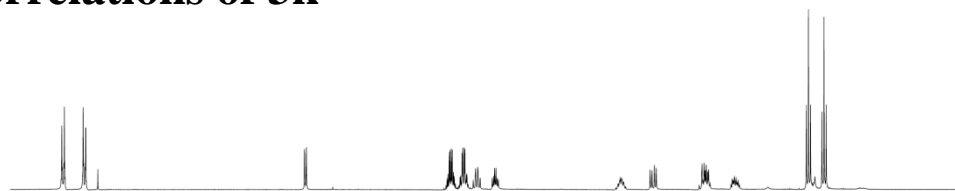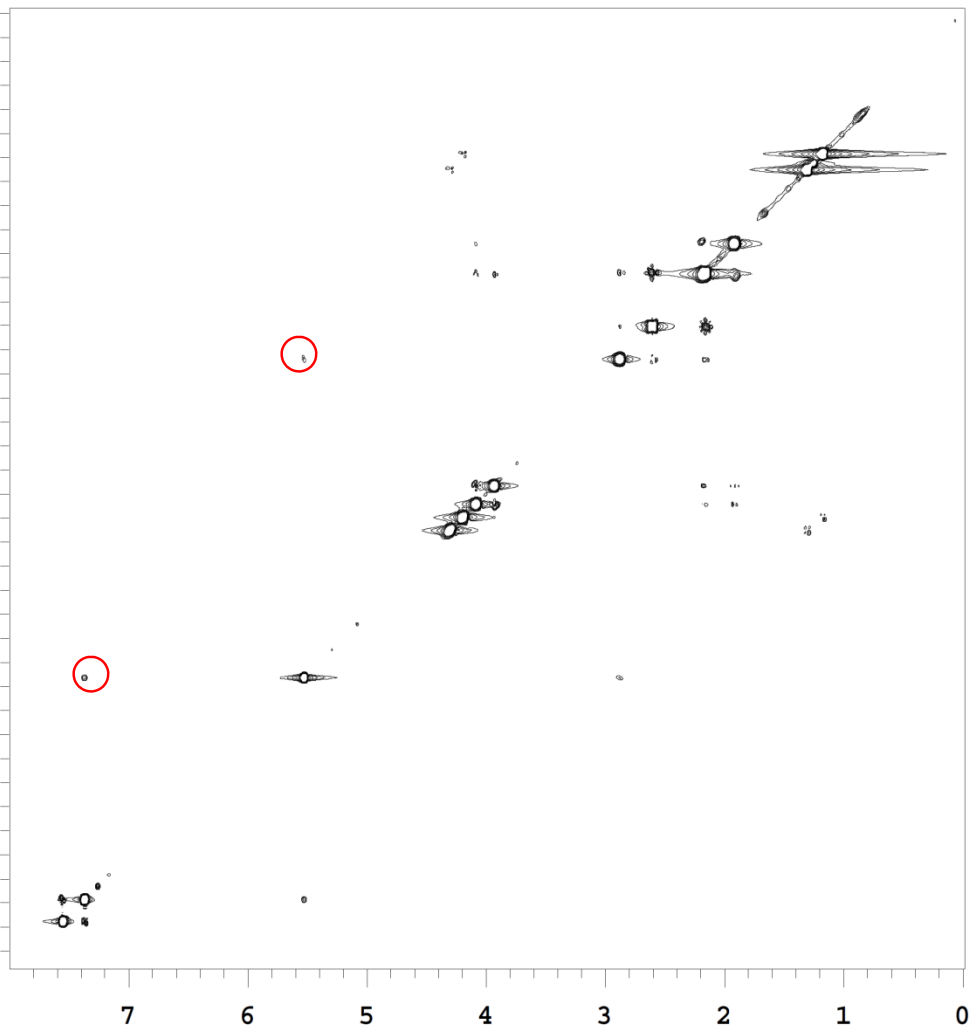

## $^1\text{H}$ - $^{15}\text{N}$ HMBC Correlations of 3k

Sample Name:  
Naresh  
Data Collected on:  
nmr-i600.chem.uwo.ca-inova600  
Archive directory:  
/home/data/Pagenkopf/Naresh  
Sample directory:  
VN-08-62-P-2013.09.28\_01  
FidFile: gHMBCAD\_VN-08-62-P\_01

Pulse Sequence: gHMBCAD  
Solvent: cdcl3  
Data collected on: Sep 27 2013

Temp. 25.0 C / 298.1 K  
Operator: Pagenkopf

Relax. delay 1.000 sec  
Acq. time 0.150 sec  
Width 9611.9 Hz  
2D Width 4253.5 Hz  
128 repetitions  
2 x 200 increments  
OBSERVE H1, 599.4318358 MHz  
DATA PROCESSING  
Sq. sine bell 0.075 sec  
F1 DATA PROCESSING  
Gauss apodization 0.043 sec  
FT size 4096 x 2048  
Total time 17 hr, 54 min

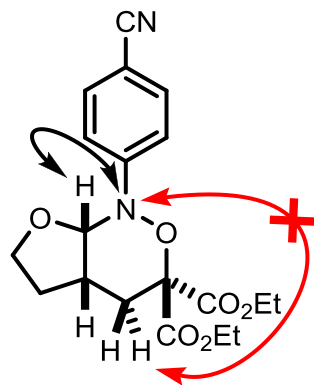

3k

F1  
(ppm)

-216

-214

-212

-210

-208

-206

-204

-202

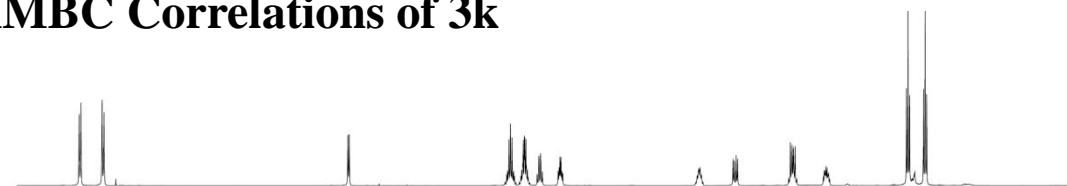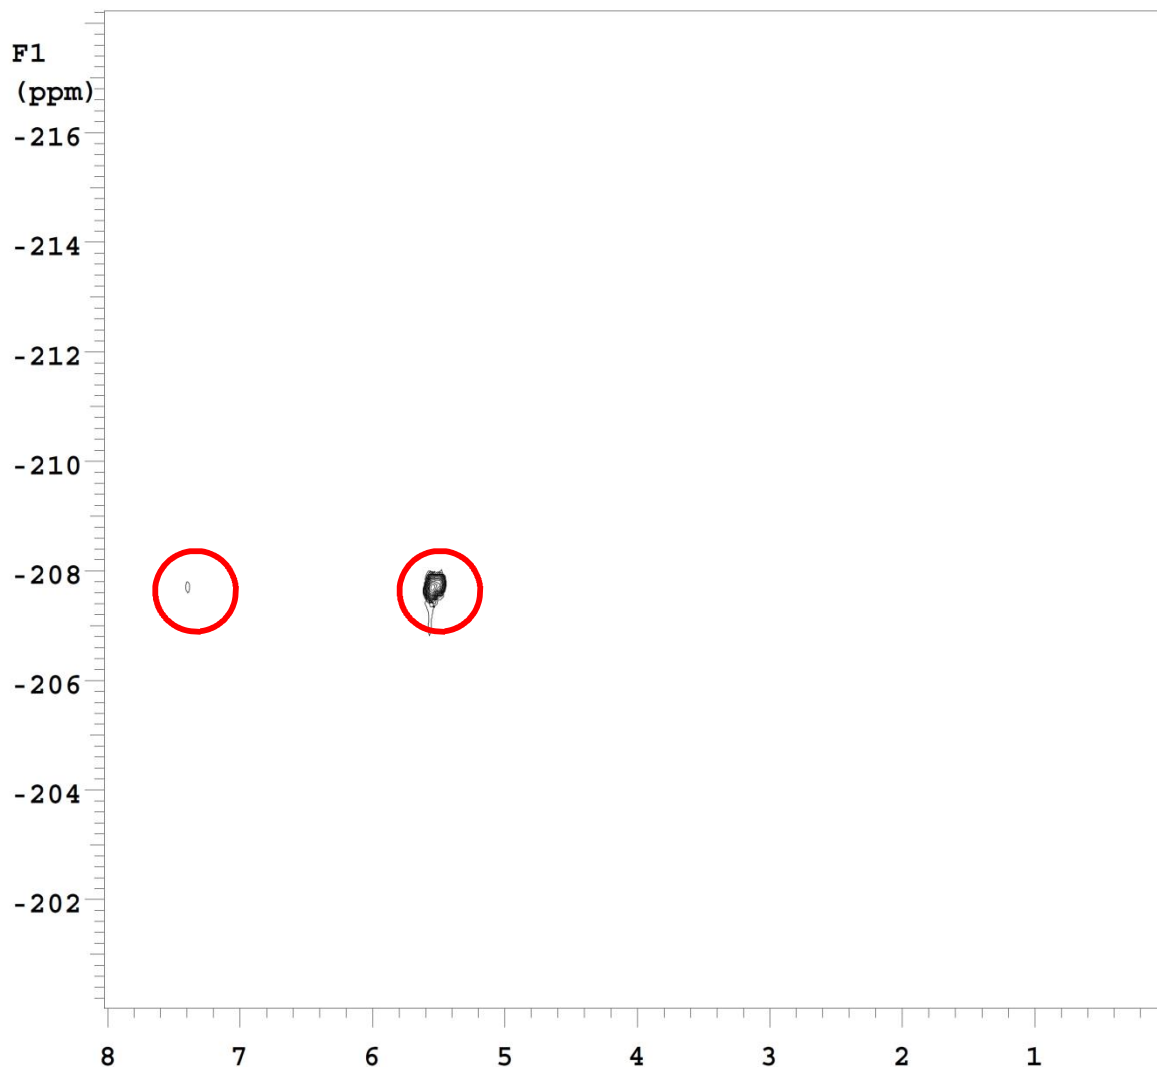

F2 (ppm)

**(4aR\*,7aR\*)-diethyl 2-(4-cyanophenyl)tetrahydro-2H-furo[3,2-e][1,2]oxazine-3,3(7aH)-dicarboxylate (4k)**

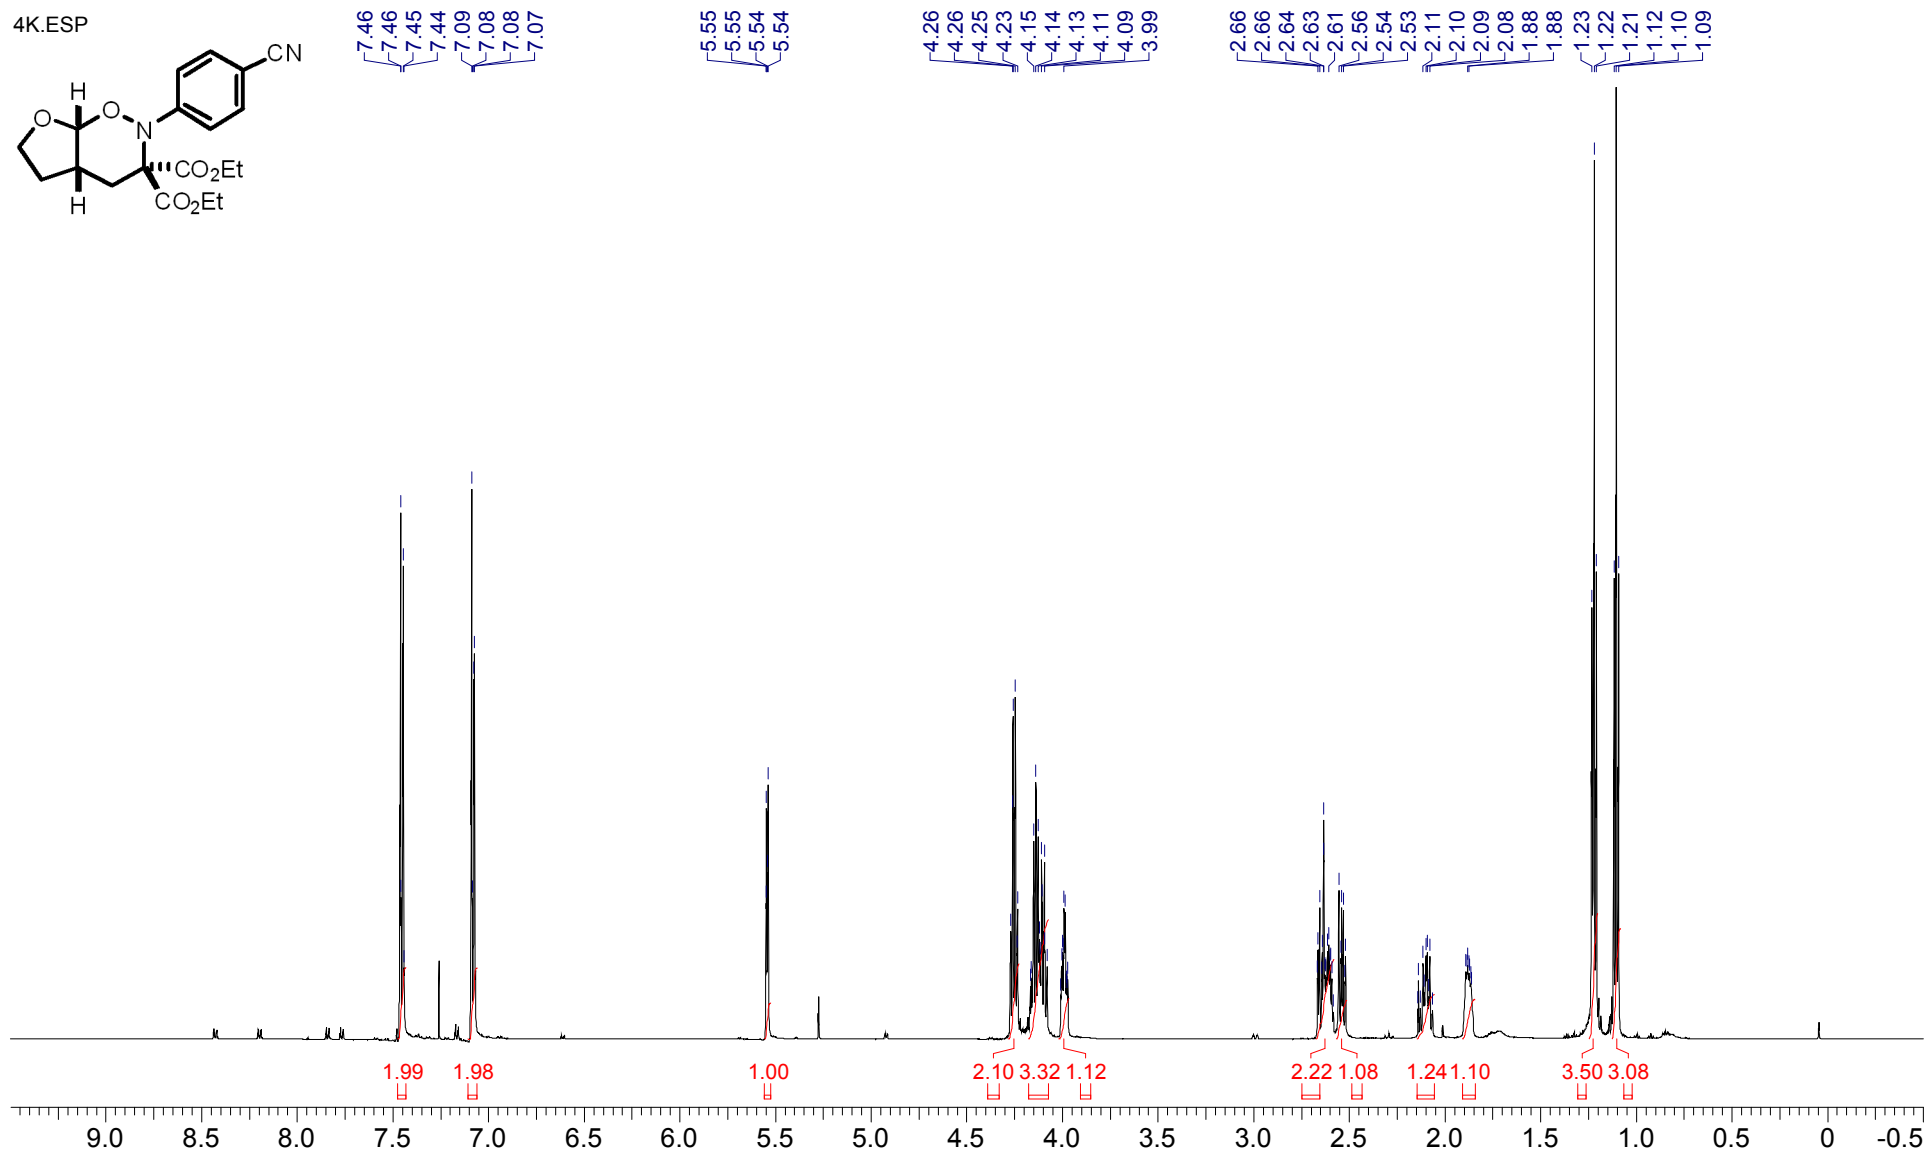

**(4aR\*,7aR\*)-diethyl 2-(4-cyanophenyl)tetrahydro-2H-furo[3,2-e][1,2]oxazine-3,3(7aH)-dicarboxylate (4k)**

4K.ESP

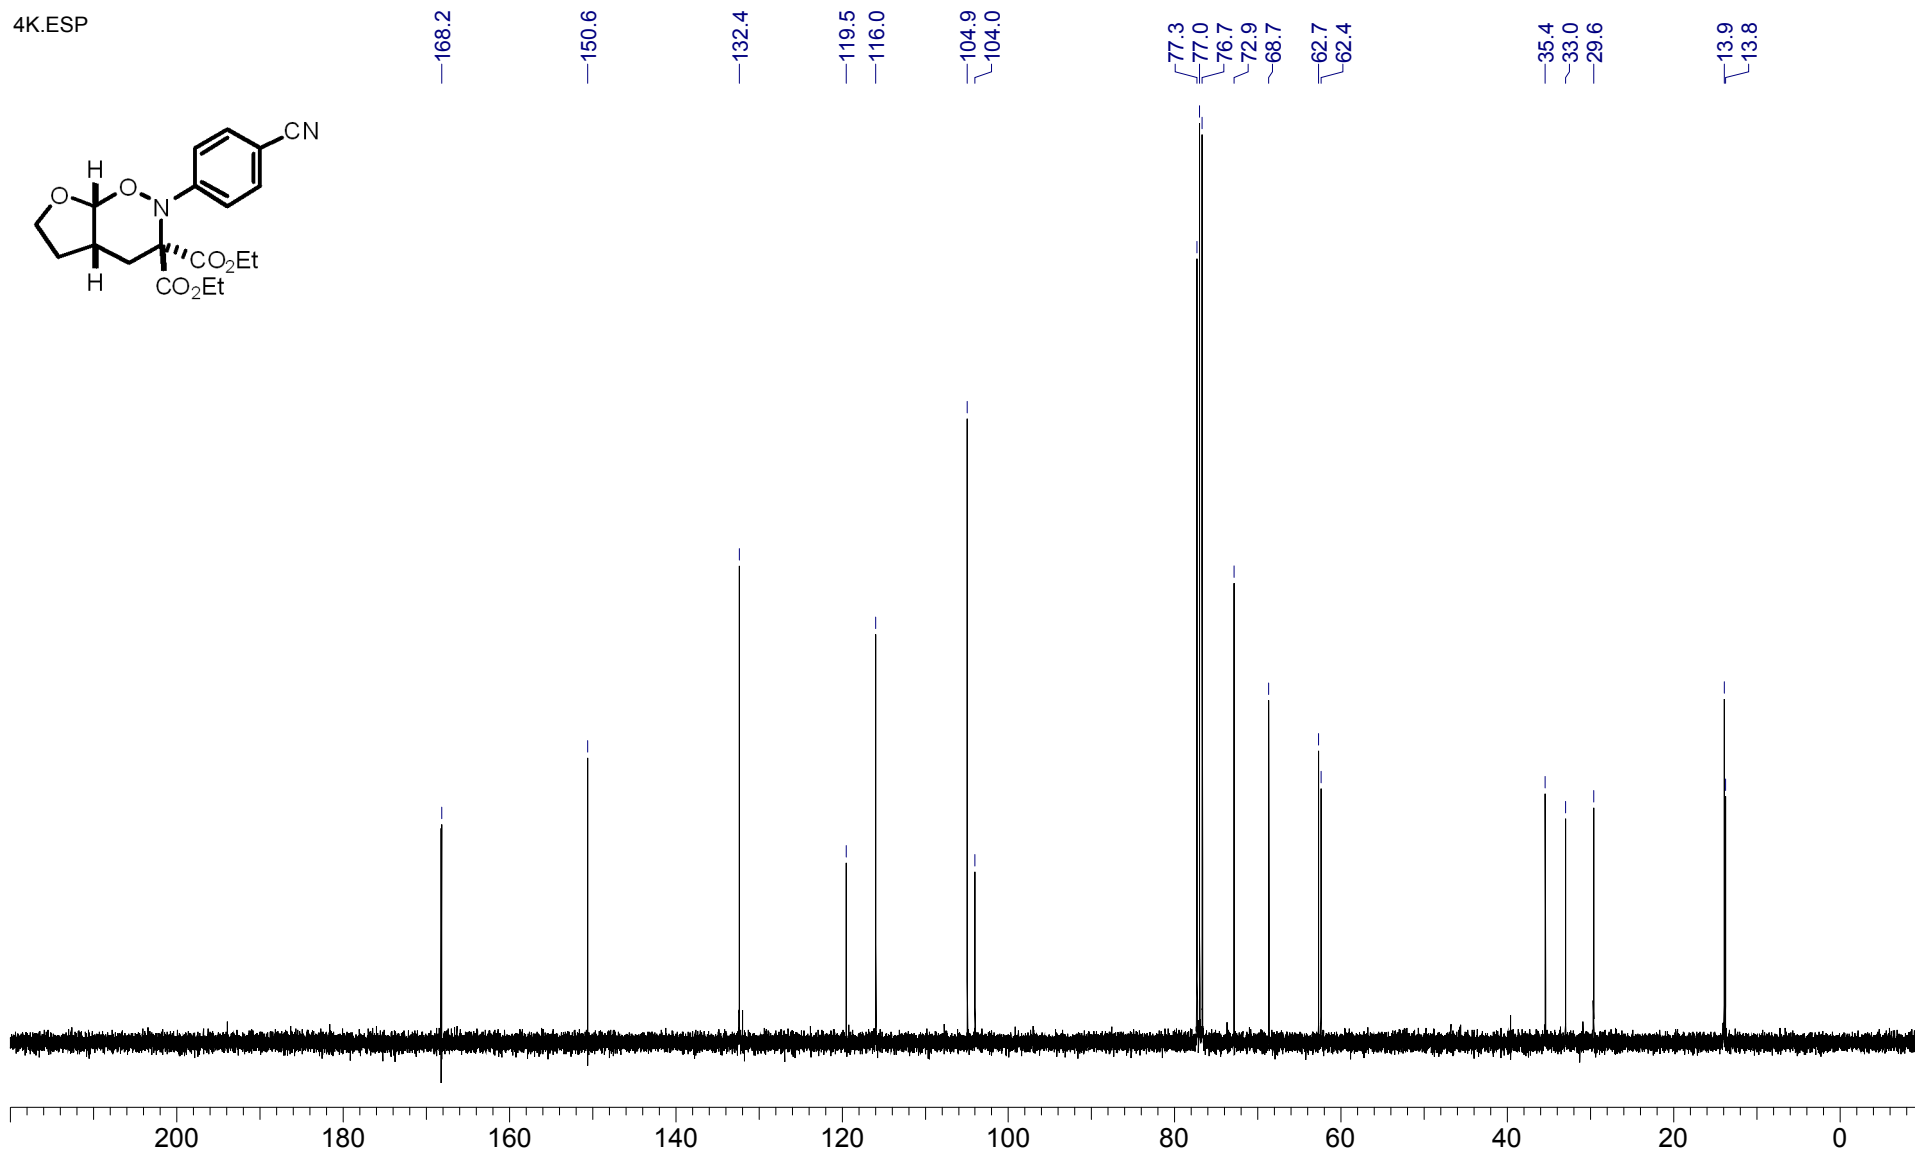

Naresh

## nOe correlations of 4k

Sample Name:

Naresh

Data Collected on:

nrmr400.chem.uwo.ca-mercury400

Archive directory:

/home/data/Pagenkopf/Naresh

Sample directory:

VN-03-39-B\_May\_19\_2012\_01

FidFile: NOESY\_01

Pulse Sequence: NOESY

Solvent: cdcl3

Data collected on: May 19 2012

Temp. 25.0 C / 298.1 K

Sample #1, Operator: Pagenkopf

Relax. delay 1.000 sec

Acq. time 0.150 sec

Width 6402.0 Hz

2D Width 6402.0 Hz

16 repetitions

2 x 200 increments

OBSERVE H1, 400.0802686 MHz

DATA PROCESSING

Gauss apodization 0.069 sec

F1 DATA PROCESSING

Gauss apodization 0.029 sec

FT size 2048 x 2048

Total time 2 hr, 32 min

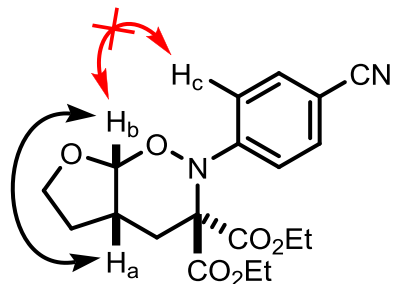

4k

H<sub>a</sub> →

H<sub>b</sub> →

H<sub>c</sub> →

F1  
(ppm)

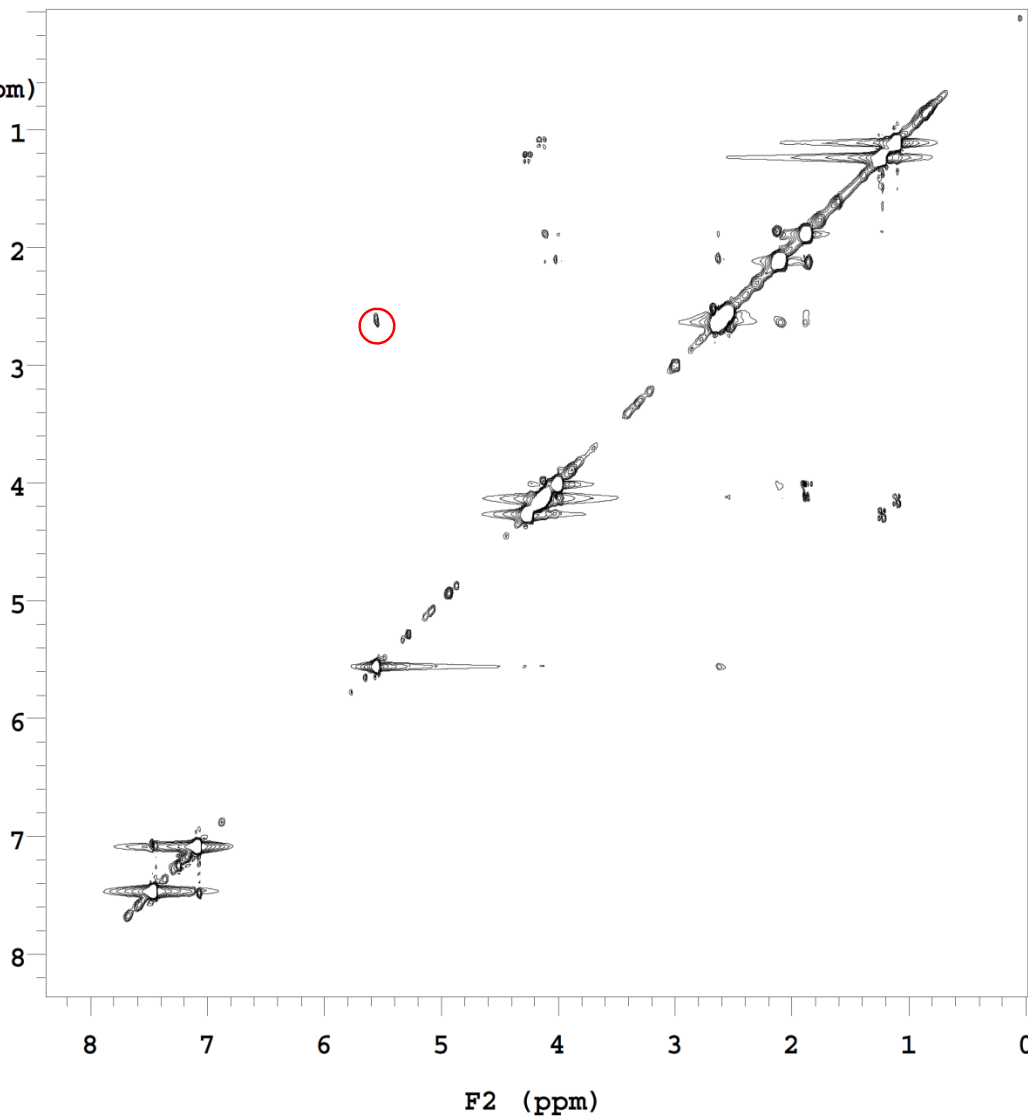

## $^1\text{H}$ - $^{15}\text{N}$ HMBC Correlations of 4k

Sample Name:  
Naresh  
Data Collected on:  
nmr-1600.chem.uwo.ca-inova600  
Archive directory:  
/home/data/Pagenkopf/Naresh  
Sample directory:  
VN-09-02-P-2013.09.29\_01  
FidFile: gHMBCAD\_VN-09-02-P\_01

Pulse Sequence: gHMBCAD  
Solvent: cdcl3  
Data collected on: Sep 29 2013

Temp. 25.0 C / 298.1 K  
Operator: Pagenkopf

Relax. delay 1.000 sec  
Acq. time 0.150 sec  
Width 9611.9 Hz  
2D Width 4253.5 Hz  
128 repetitions  
2 x 200 increments  
OBSERVE H1, 599.4318358 MHz  
DATA PROCESSING  
Sq. sine bell 0.075 sec  
F1 DATA PROCESSING  
Gauss apodization 0.043 sec  
FT size 4096 x 2048  
Total time 17 hr, 54 min

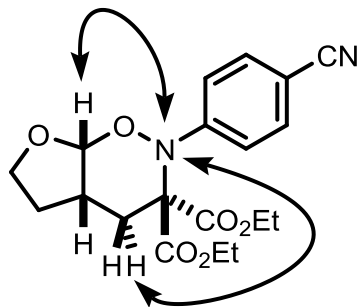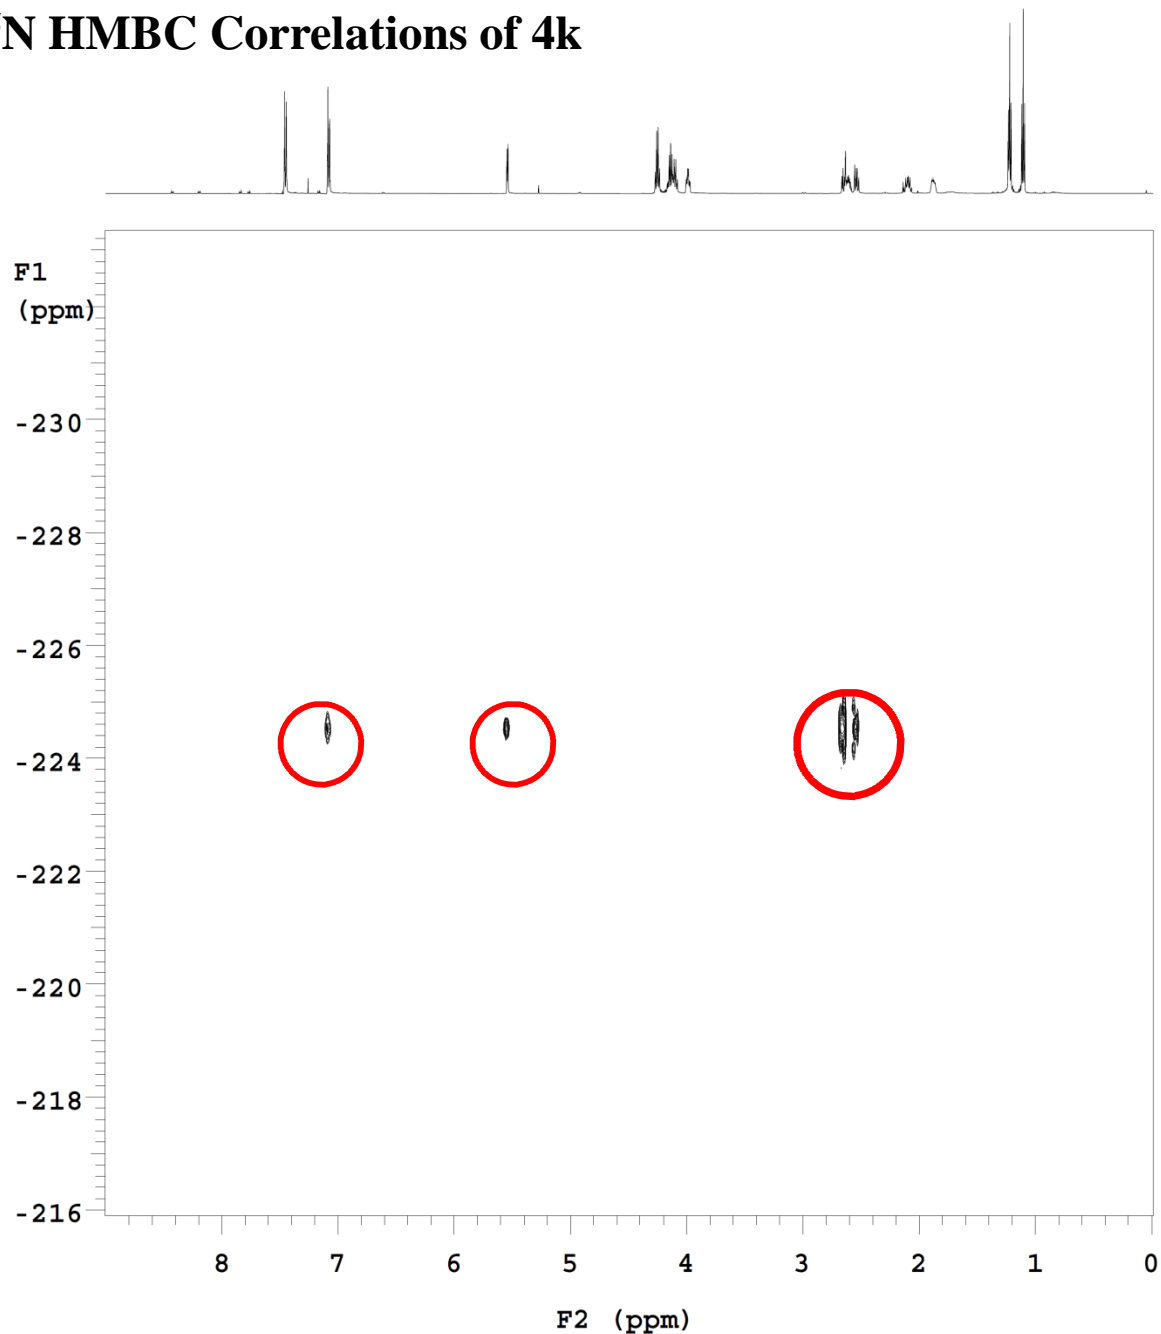



**(4a*S*\*,7a*S*\*)-diethyl 1-(4-nitrophenyl)tetrahydro-1H-furo[2,3-*c*][1,2]oxazine-3,3(7aH)-dicarboxylate (3l)**

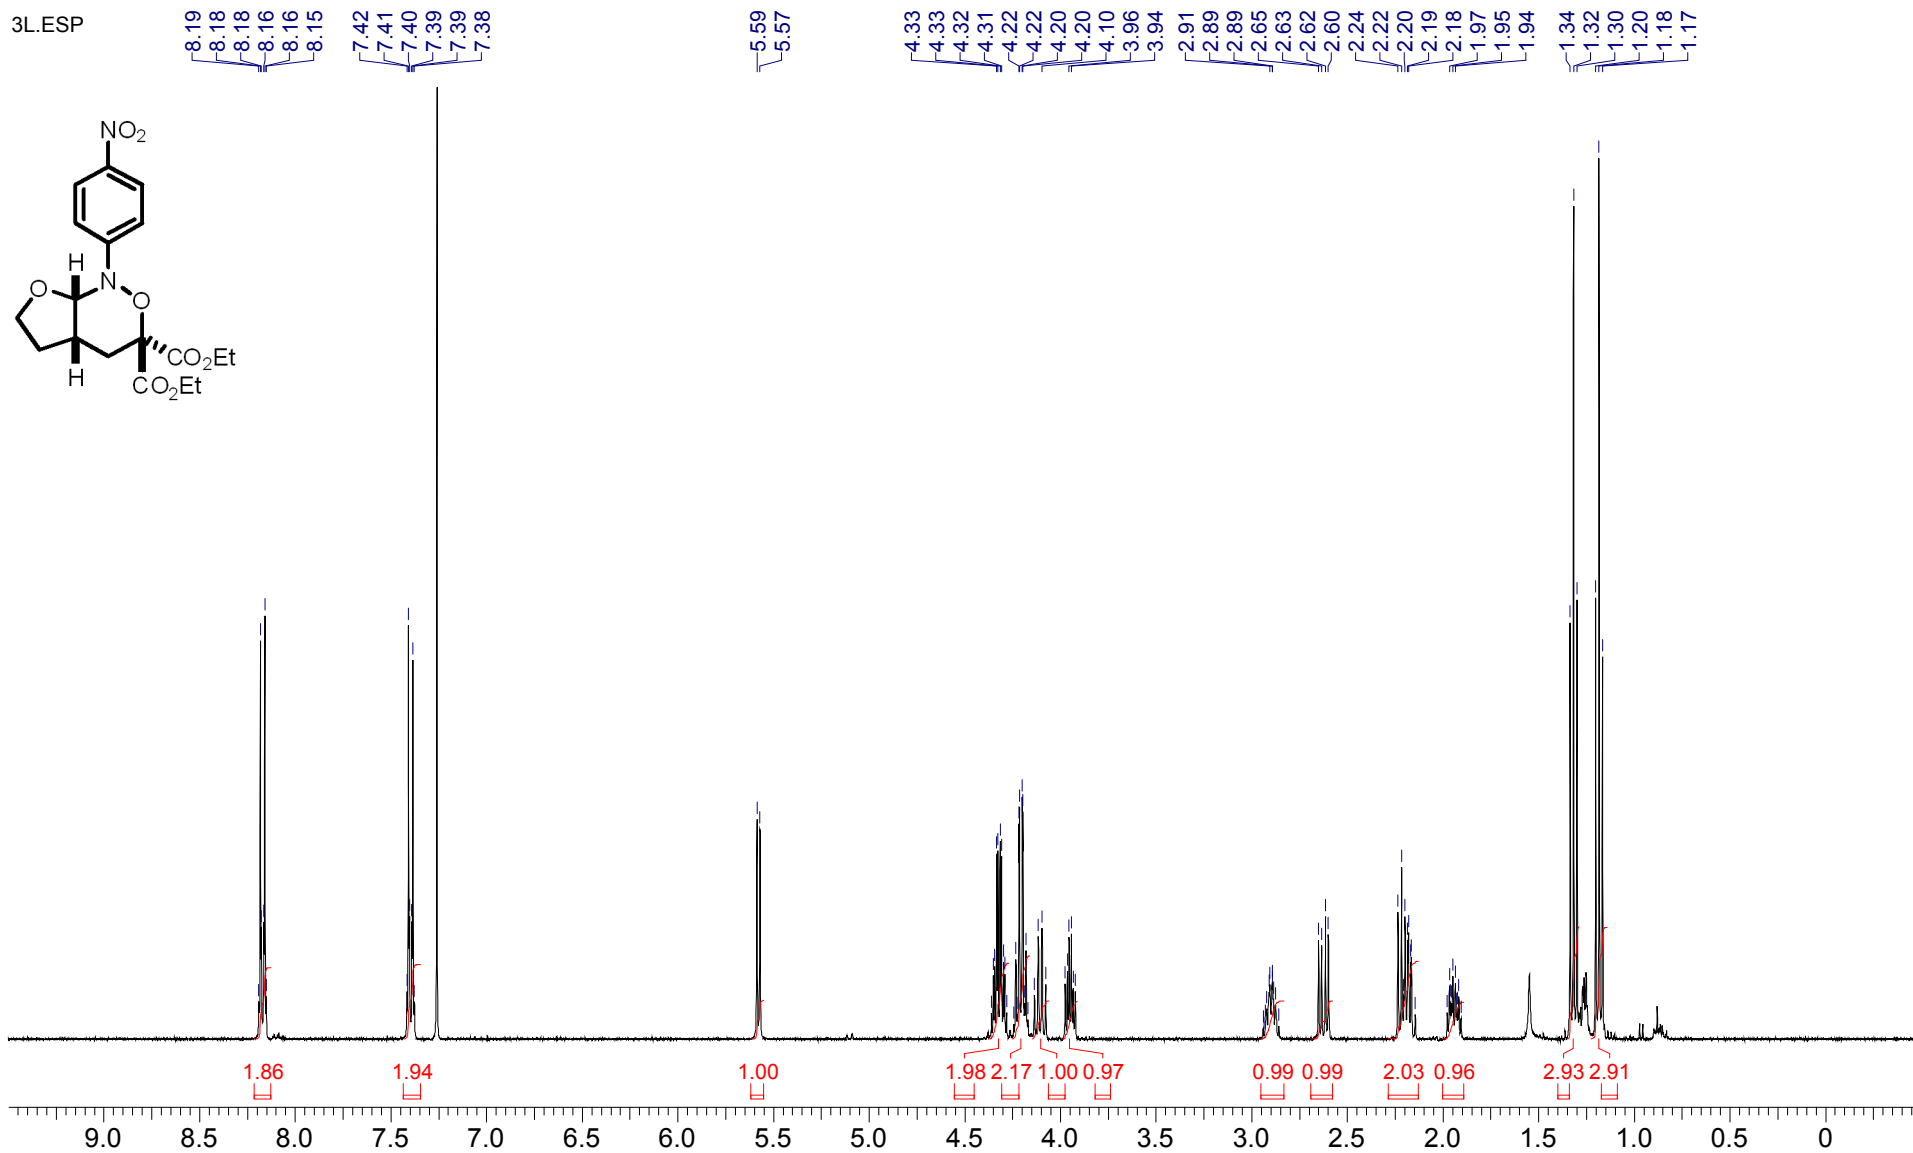

**(4a*S*\*,7a*S*\*)-diethyl 1-(4-nitrophenyl)tetrahydro-1H-furo[2,3-*c*][1,2]oxazine-3,3(7aH)-dicarboxylate (3l)**

3L.ESP

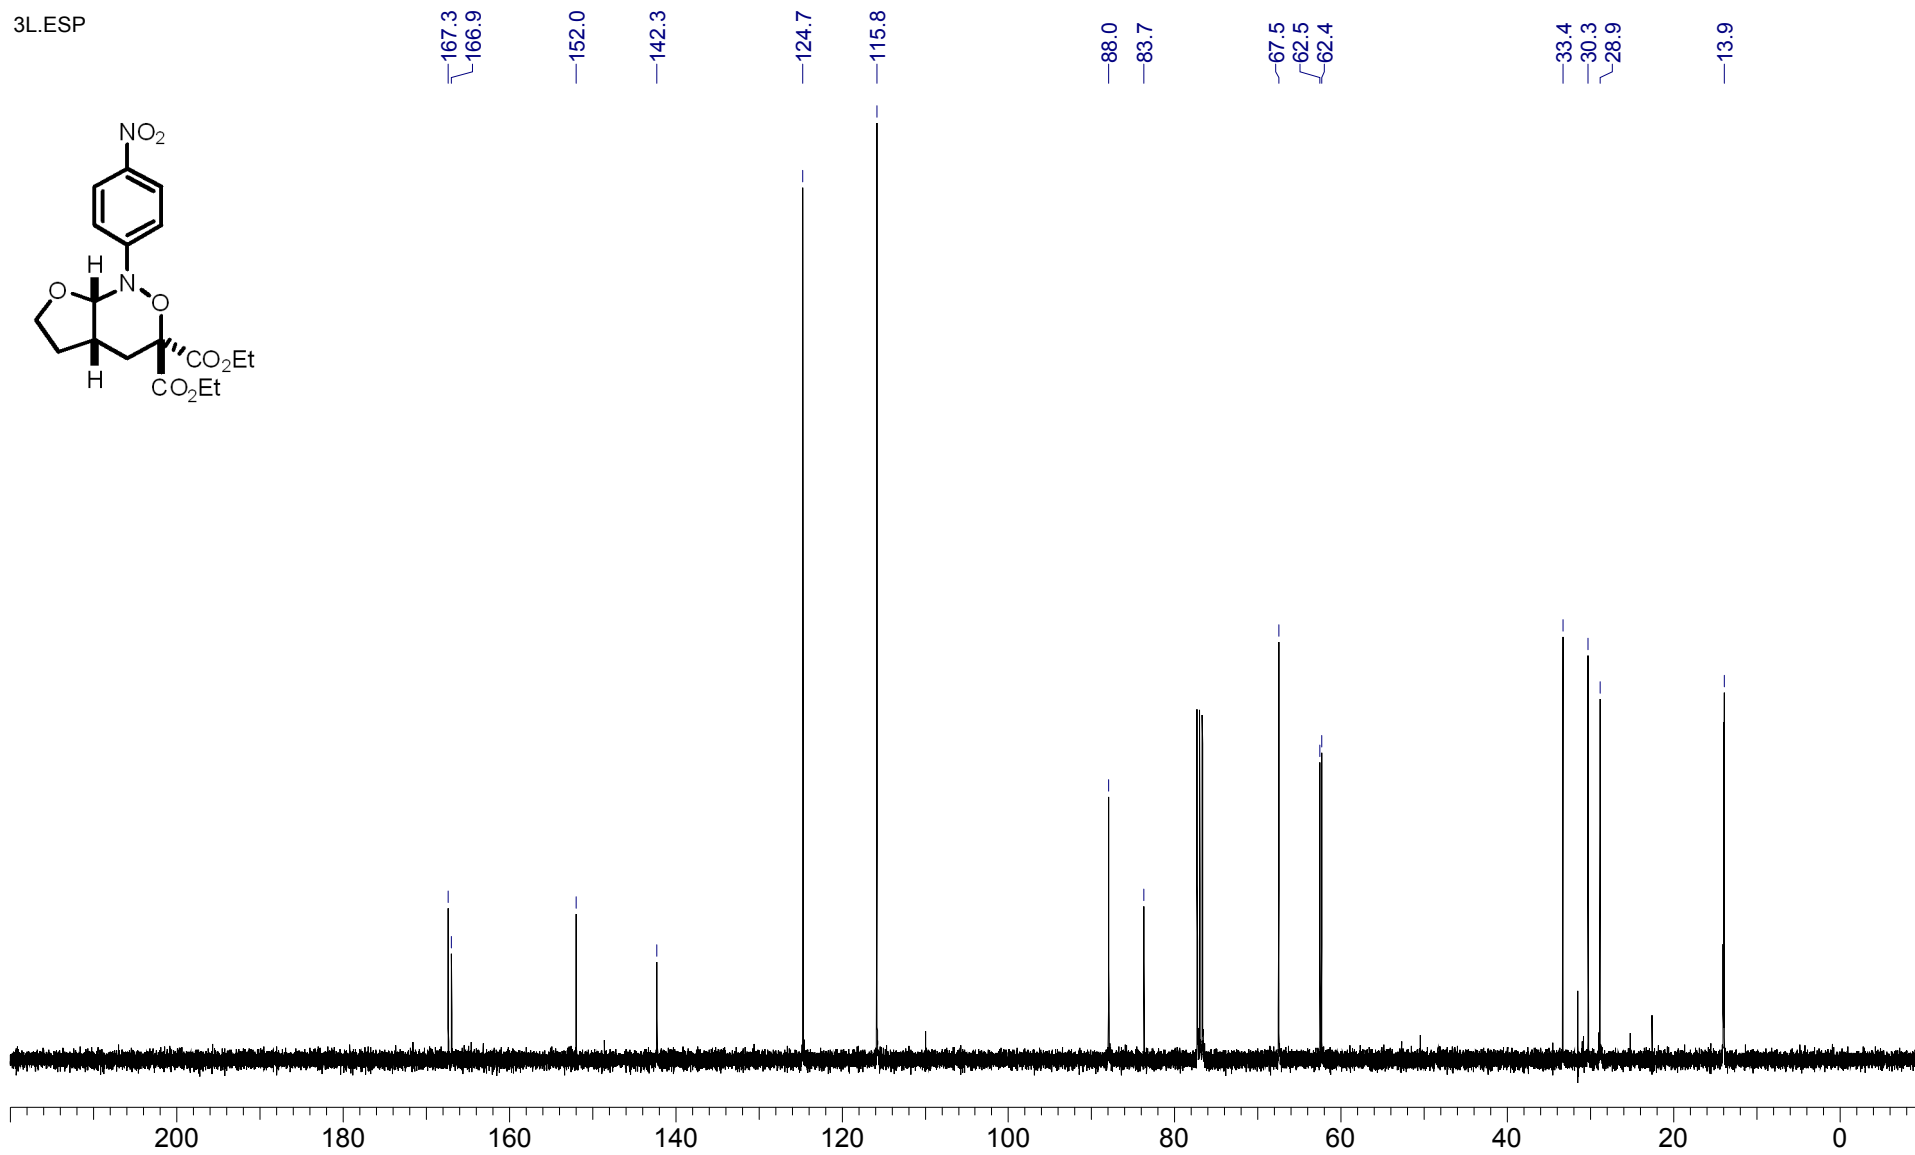

Naresh

## nOe correlations of 3I

Sample Name:

Naresh

Data Collected on:

nmr-m400.chem.uwo.ca-mercury400

Archive directory:

/home/data/Pagenkopf/Naresh

Sample directory:

VN-09-04-P-2013.09.29\_01

FidFile: NOESY\_VN-09-04-P\_01

Pulse Sequence: NOESY

Solvent: cdcl3

Data collected on: Sep 29 2013

Temp. 25.0 C / 298.1 K

Sample #2, Operator: Pagenkopf

Relax. delay 1.000 sec

Acq. time 0.150 sec

Width 4118.6 Hz

2D Width 4118.6 Hz

16 repetitions

2 x 200 increments

OBSERVE H1, 400.0802686 MHz

DATA PROCESSING

Gauss apodization 0.069 sec

F1 DATA PROCESSING

Gauss apodization 0.045 sec

FT size 2048 x 2048

Total time 2 hr, 33 min

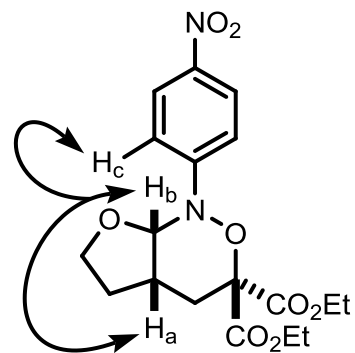

3I

H<sub>a</sub> →

H<sub>b</sub> →

H<sub>c</sub> →

F1  
(ppm)

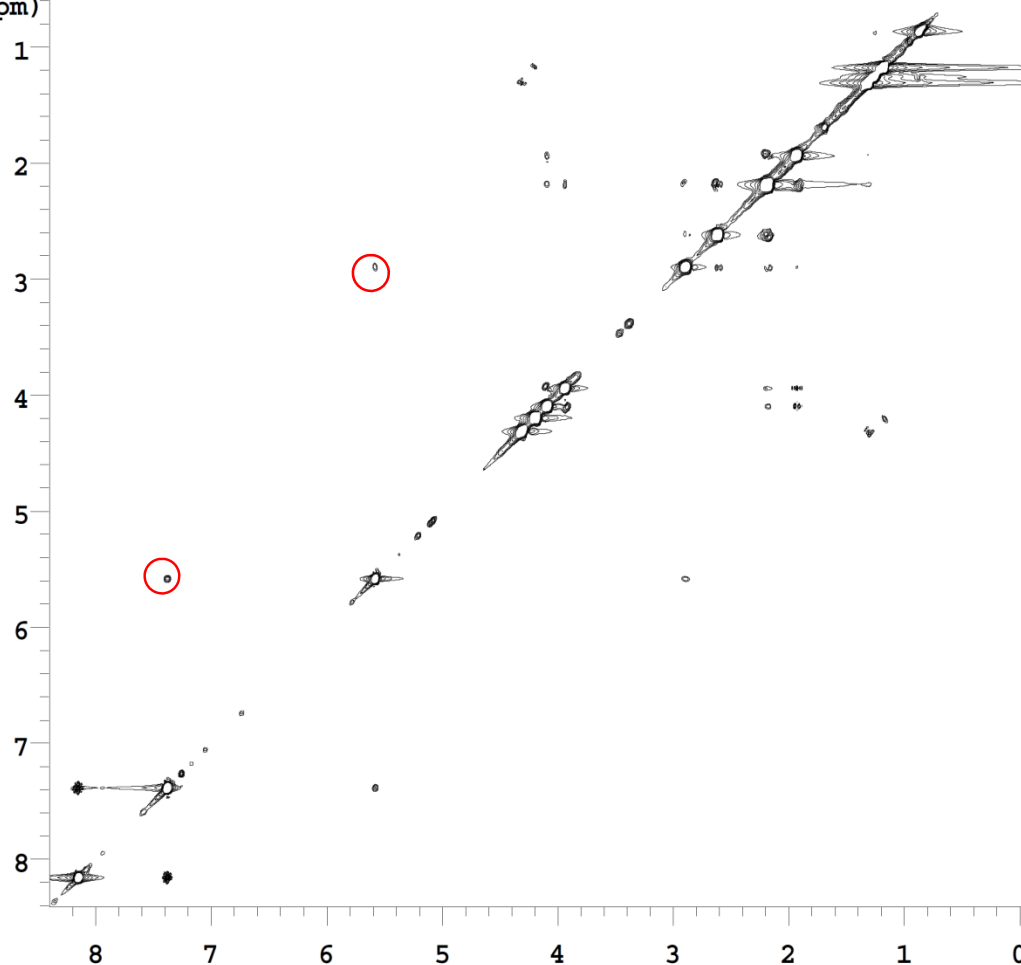

F2 (ppm)

# $^1\text{H}$ - $^{15}\text{N}$ HMBC Correlations of 3l

Sample Name:  
Naresh  
Data Collected on:  
nmr-i600.chem.uwo.ca-inova600  
Archive directory:  
/home/data/Pagenkopf/Naresh  
Sample directory:  
VN-09-04-P-2013.09.30\_01  
FidFile: gHMBCAD\_VN-09-04-P\_01

Pulse Sequence: gHMBCAD  
Solvent: cdcl3  
Data collected on: Sep 30 2013

Temp. 25.0 C / 298.1 K  
Operator: Pagenkopf

Relax. delay 1.000 sec  
Acq. time 0.150 sec  
Width 9611.9 Hz  
2D Width 6076.3 Hz  
128 repetitions  
2 x 128 increments  
OBSERVE H1, 599.4318358 MHz  
DATA PROCESSING  
Sq. sine bell 0.075 sec  
F1 DATA PROCESSING  
Gauss apodization 0.019 sec  
FT size 4096 x 2048  
Total time 11 hr, 41 min

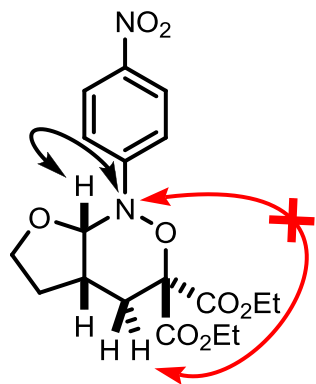

3l

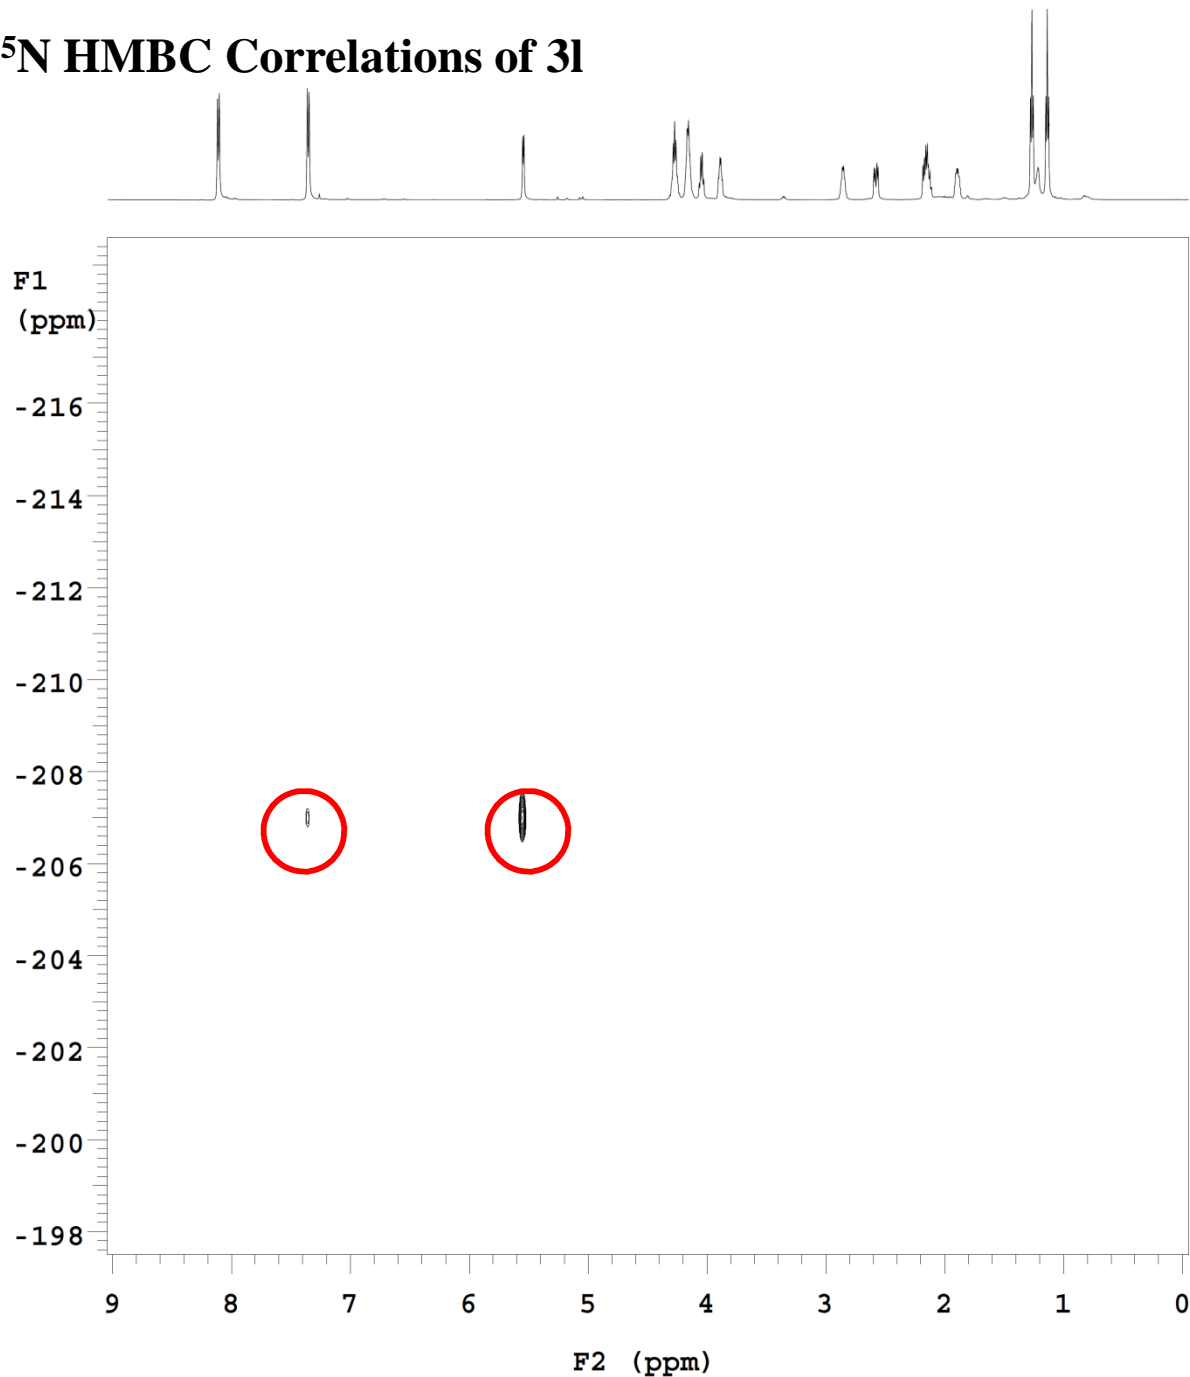

**(4a*R*\*,7a*R*\*)-diethyl 2-(4-nitrophenyl)tetrahydro-2H-furo[3,2-*e*][1,2]oxazine-3,3(7aH)-dicarboxylate (4l)**

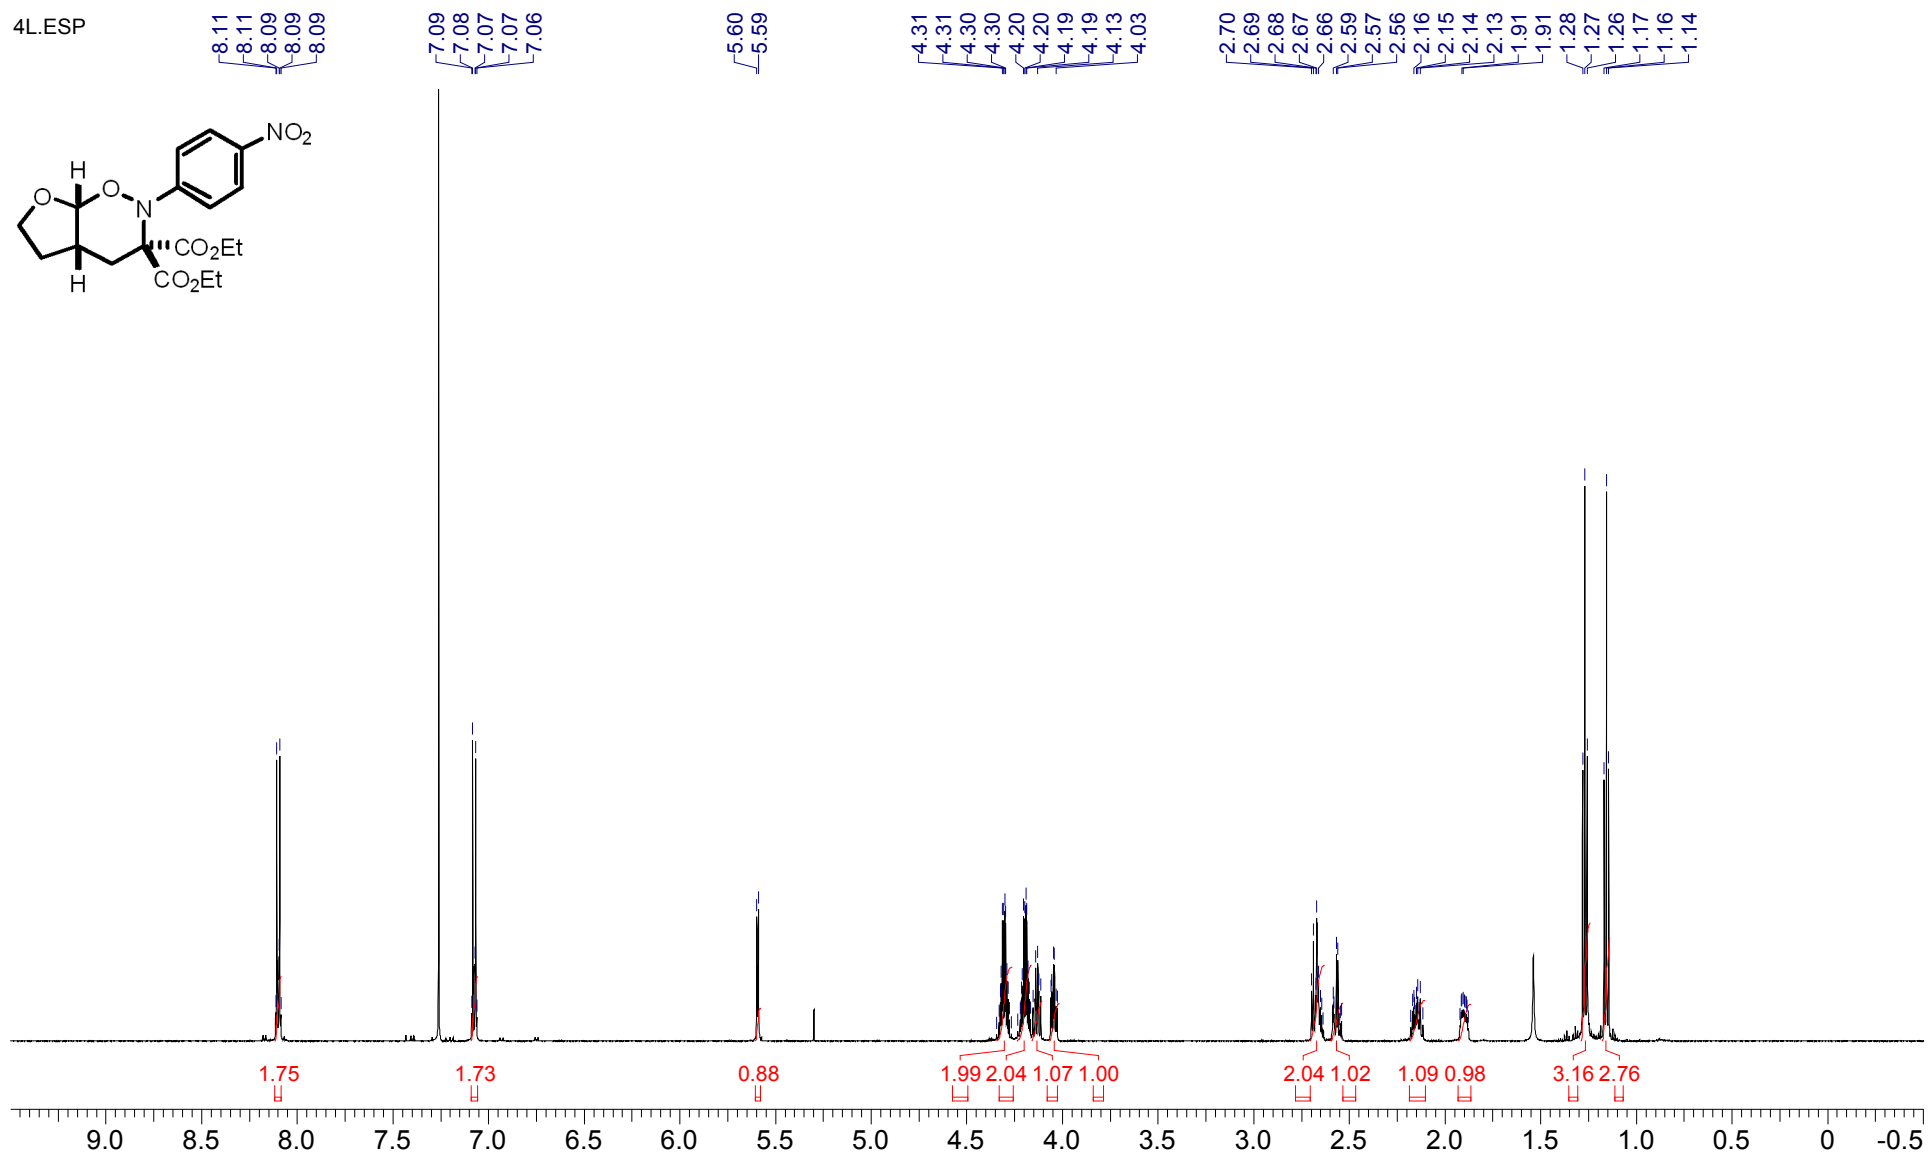

**(4a*R*\*,7a*R*\*)-diethyl 2-(4-nitrophenyl)tetrahydro-2H-furo[3,2-*e*][1,2]oxazine-3,3(7aH)-dicarboxylate (4l)**

4L.ESP

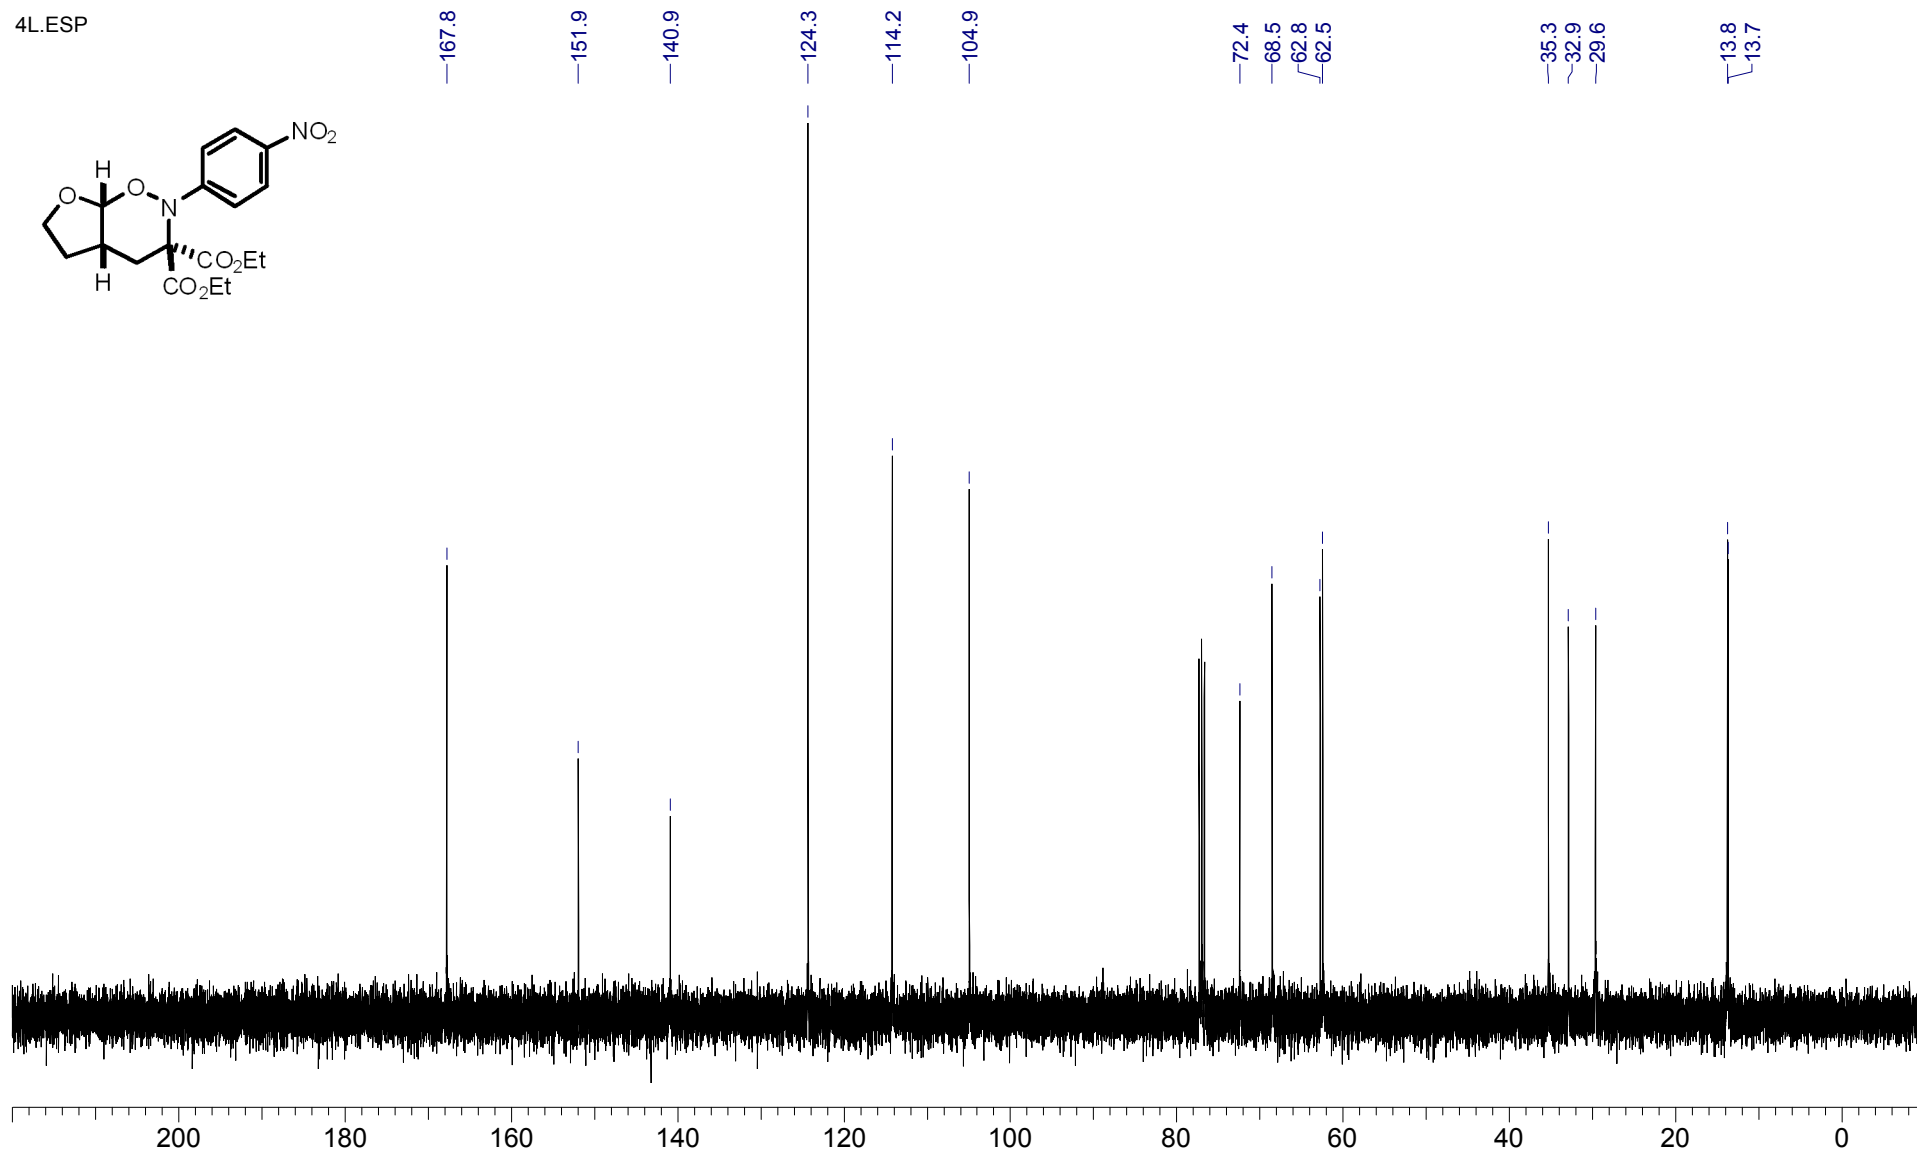

## nOe correlations of 4I

Sample Name:  
Naresh  
Data Collected on:  
nmr-m400.chem.uwo.ca-mercury400  
Archive directory:  
/home/data/Pagenkopf/Naresh  
Sample directory:  
VN-09-03-P-2013.09.29\_02  
FidFile: NOESY\_VN-09-03-P\_01

Pulse Sequence: NOESY  
Solvent: cdcl3  
Data collected on: Sep 29 2013

Temp. 25.0 C / 298.1 K  
Sample #3, Operator: Pagenkopf

Relax. delay 1.000 sec  
Acq. time 0.150 sec  
Width 3759.4 Hz  
2D Width 3759.4 Hz  
16 repetitions  
2 x 200 increments  
OBSERVE H1, 400.0802686 MHz  
DATA PROCESSING  
Gauss apodization 0.069 sec  
F1 DATA PROCESSING  
Gauss apodization 0.049 sec  
FT size 2048 x 2048  
Total time 2 hr, 33 min

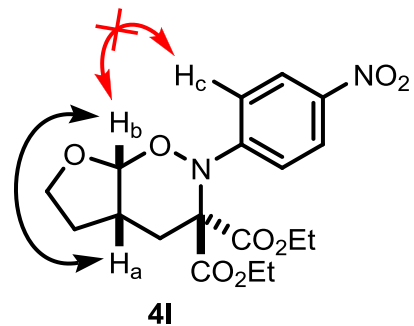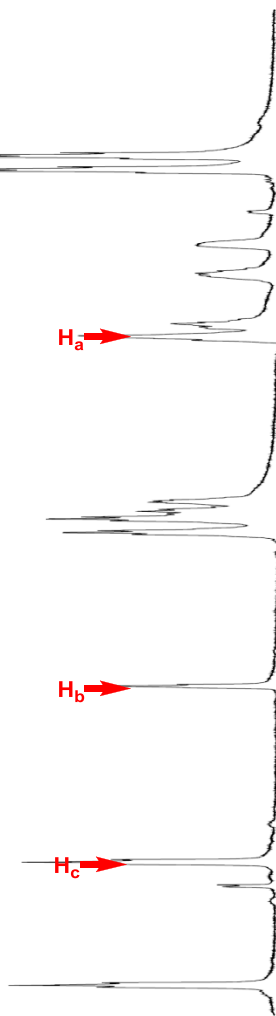

F1  
(ppm)

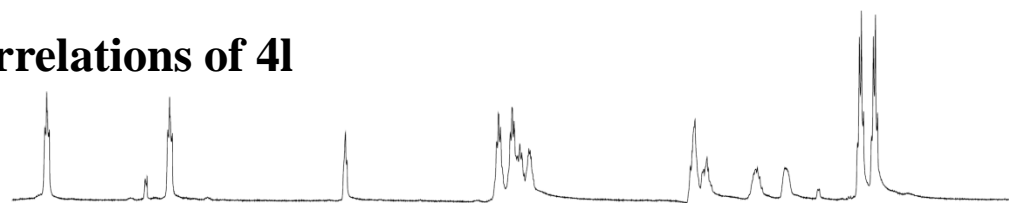

F2  
(ppm)

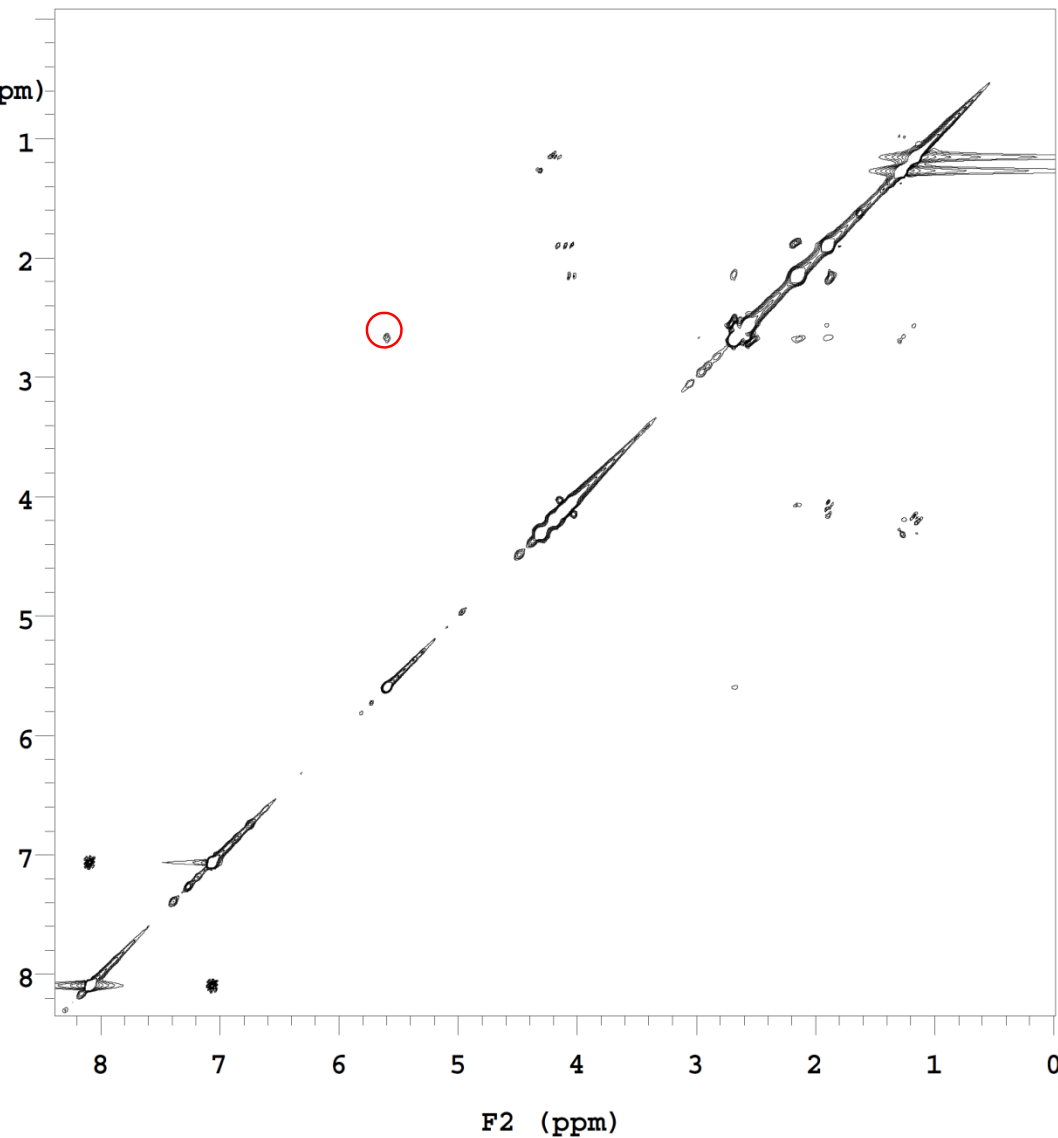

Naresh

## $^1\text{H}$ - $^{15}\text{N}$ HMBC Correlations of 4I

Sample Name:

Naresh

Data Collected on:

nmr-i600.chem.uwo.ca-inova600

Archive directory:

/home/data/Pagenkopf/Naresh

Sample directory:

VN-09-03-P-2013.09.28\_01

FidFile: gHMBCAD\_VN-09-03-P\_01

Pulse Sequence: gHMBCAD

Solvent: cdcl3

Data collected on: Sep 28 2013

Temp. 25.0 C / 298.1 K

Operator: Pagenkopf

Relax. delay 1.000 sec

Acq. time 0.150 sec

Width 9611.9 Hz

2D Width 6076.3 Hz

128 repetitions

2 x 200 increments

OBSERVE H1, 599.4318358 MHz

DATA PROCESSING

Sq. sine bell 0.075 sec

F1 DATA PROCESSING

Gauss apodization 0.030 sec

FT size 4096 x 2048

Total time 17 hr, 49 min

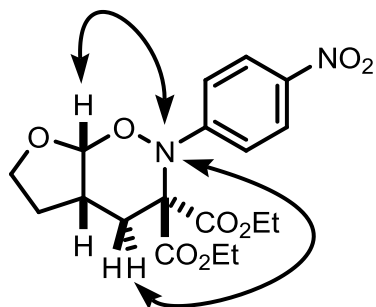

4I

F1

(ppm)

-234

-232

-230

-228

-226

-224

-222

-220

-218

-216

-214

-212

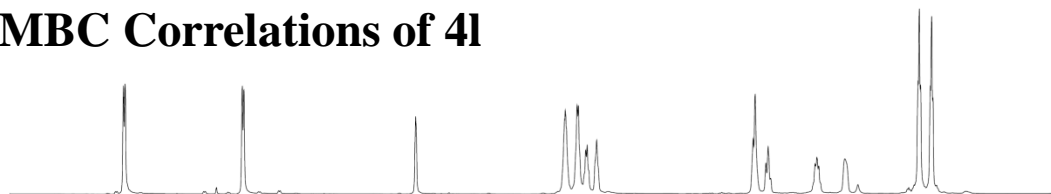

8 7 6 5 4 3 2 1 0

F2 (ppm)



**(4a*S*\*,7a*S*\*)-diethyl 1-p-tolyltetrahydro-1H-furo[2,3-c][1,2]oxazine-3,3(7aH)-dicarboxylate (3m)**

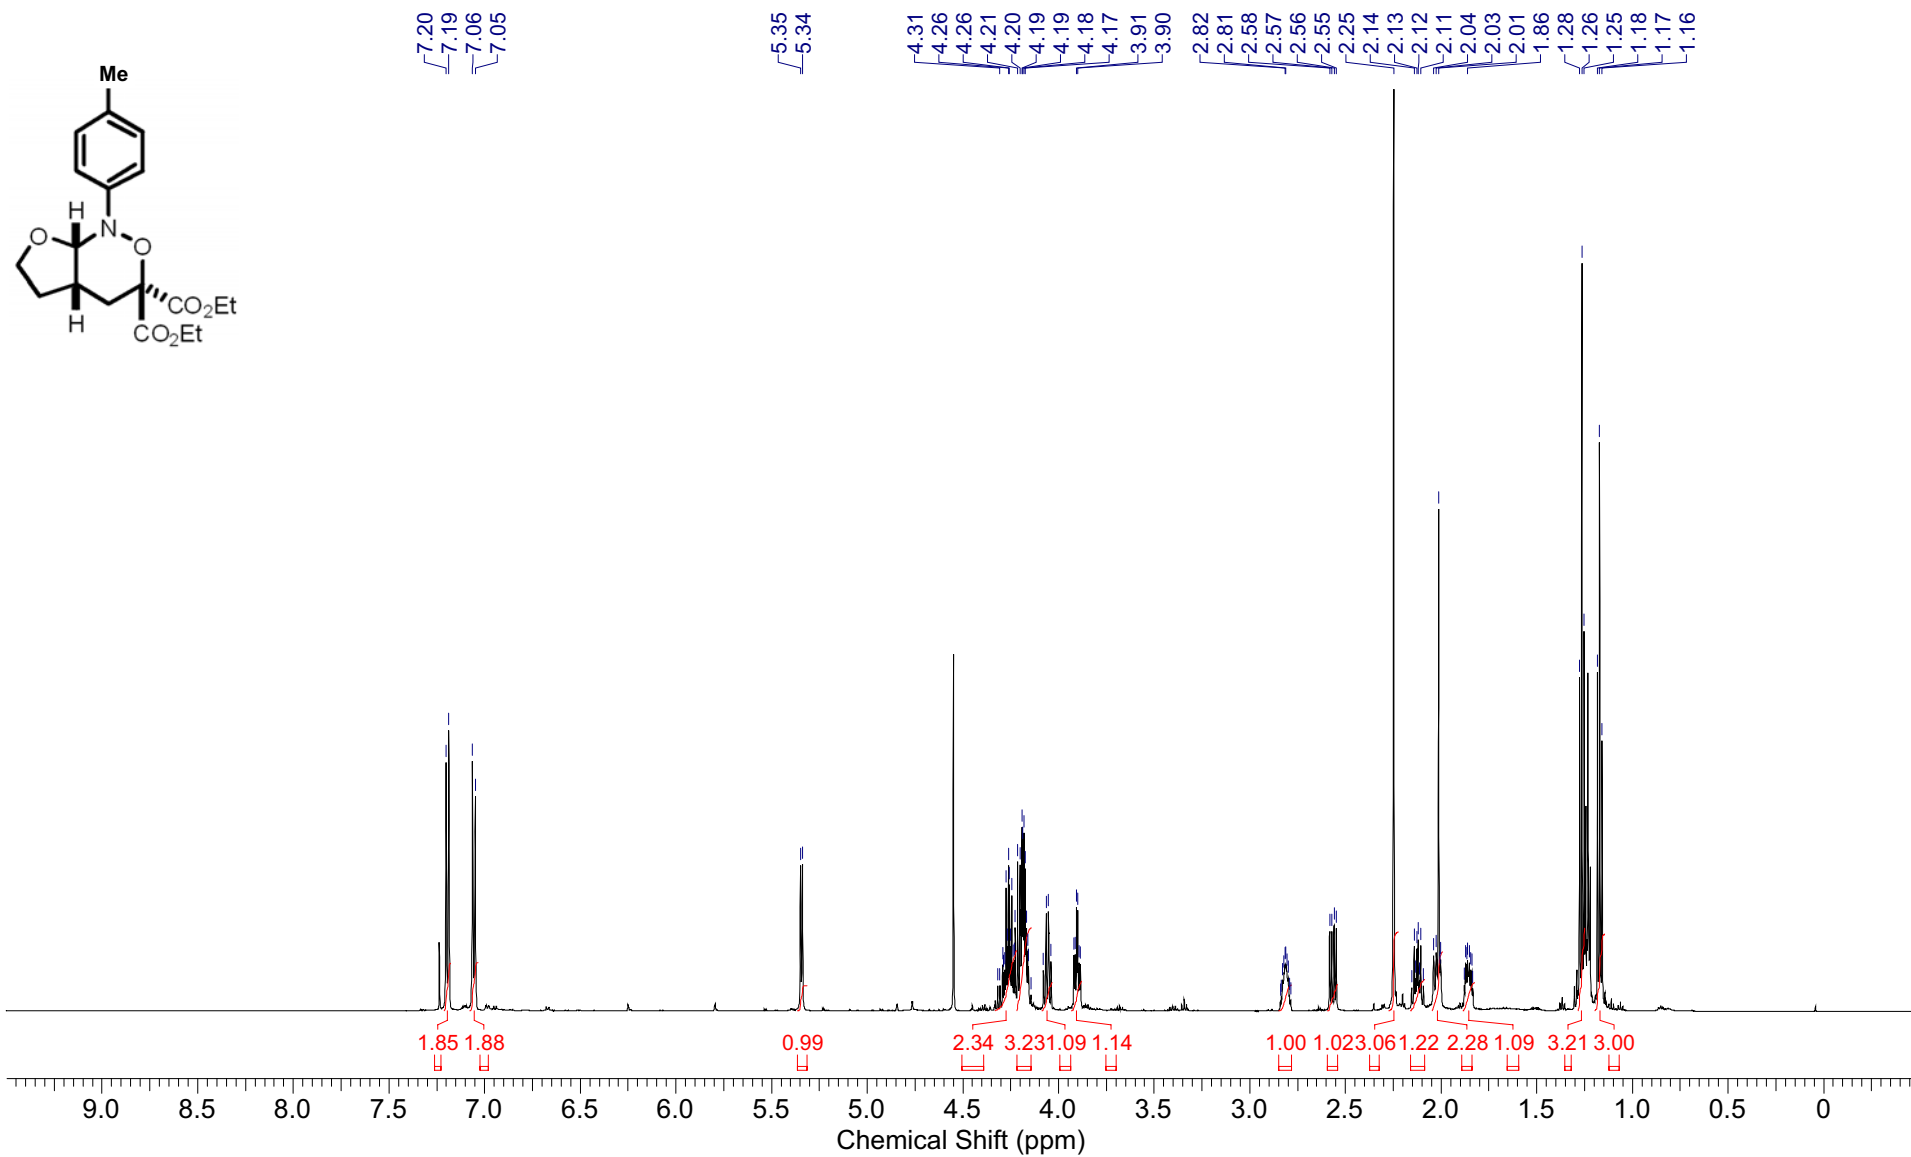

(4a*S*\*,7a*S*\*)-diethyl 1-p-tolyltetrahydro-1H-furo[2,3-c][1,2]oxazine-3,3(7aH)-dicarboxylate (**3m**)

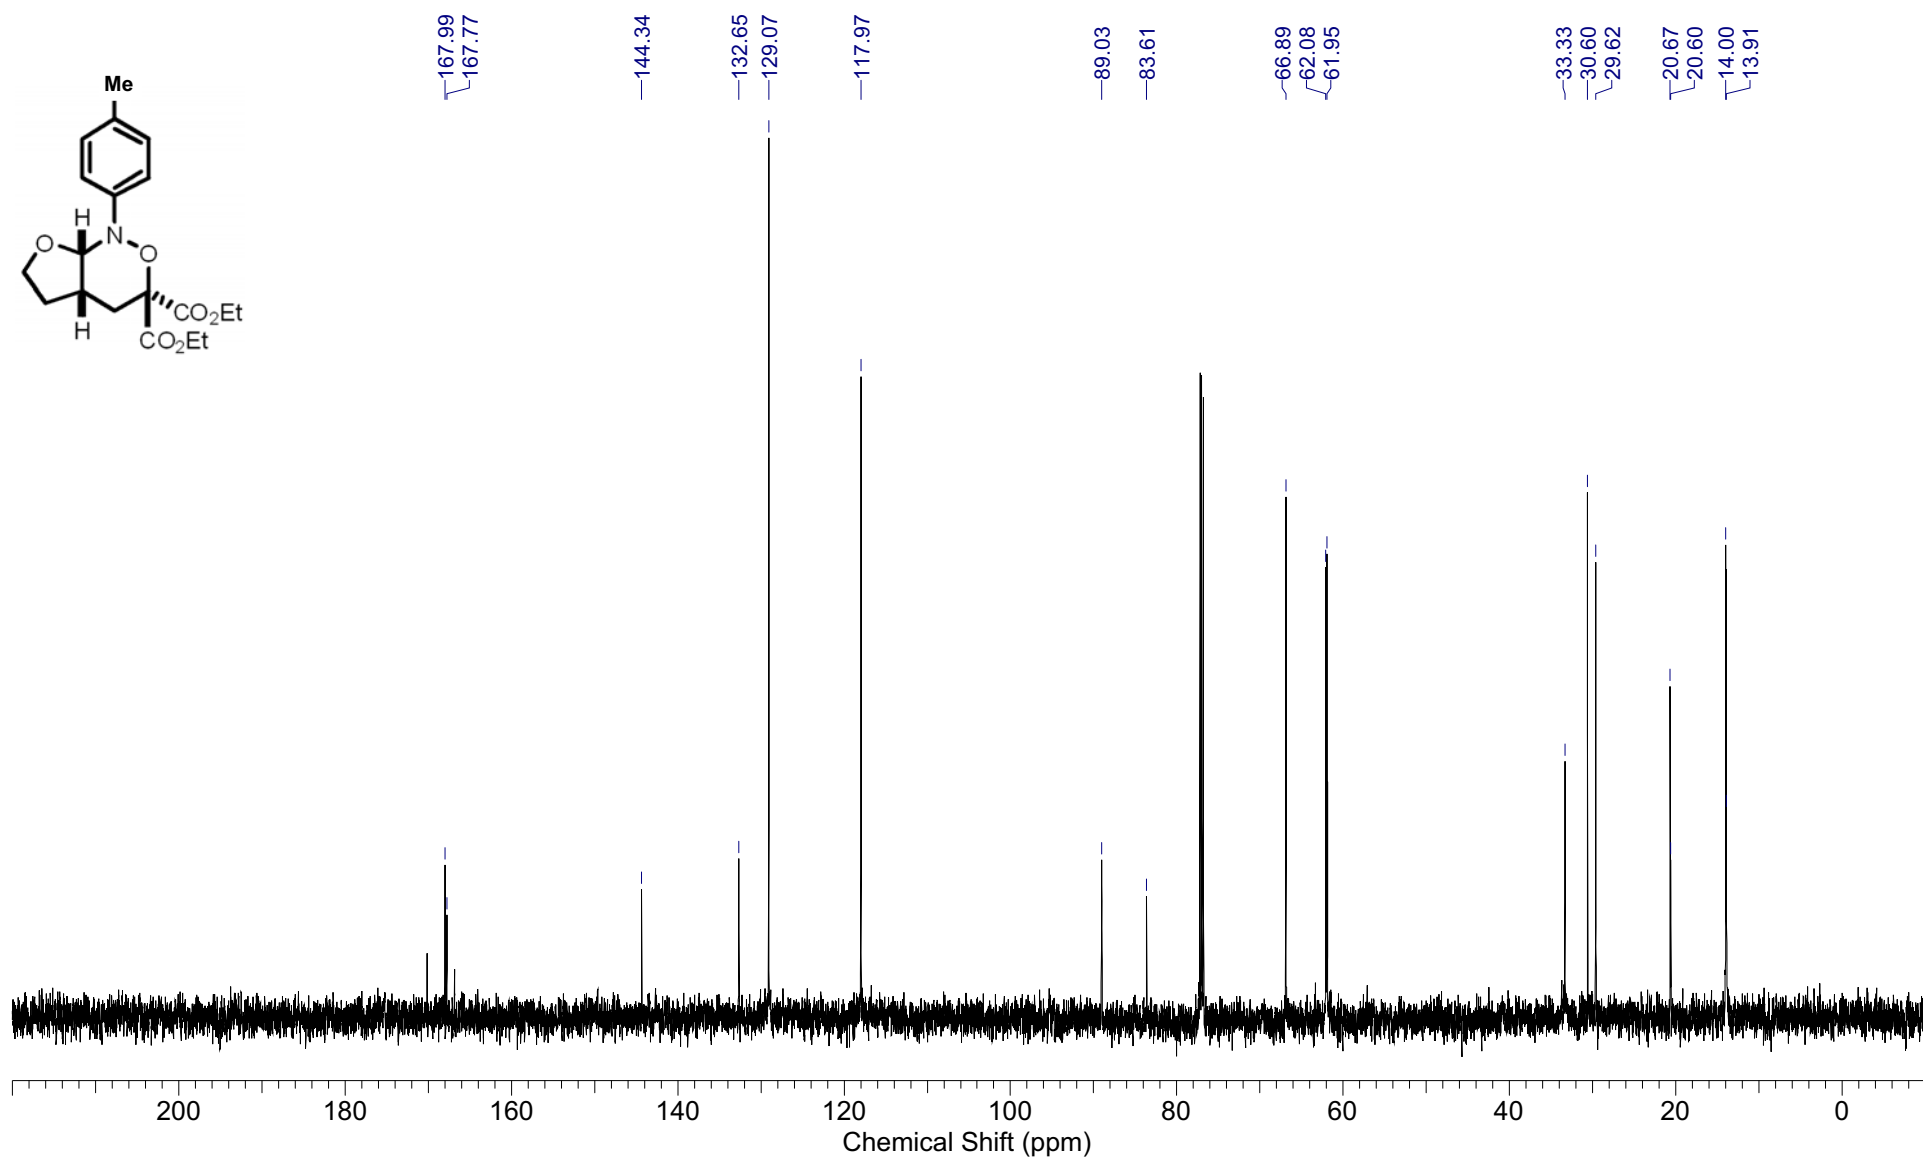

## nOe correlations of 3m

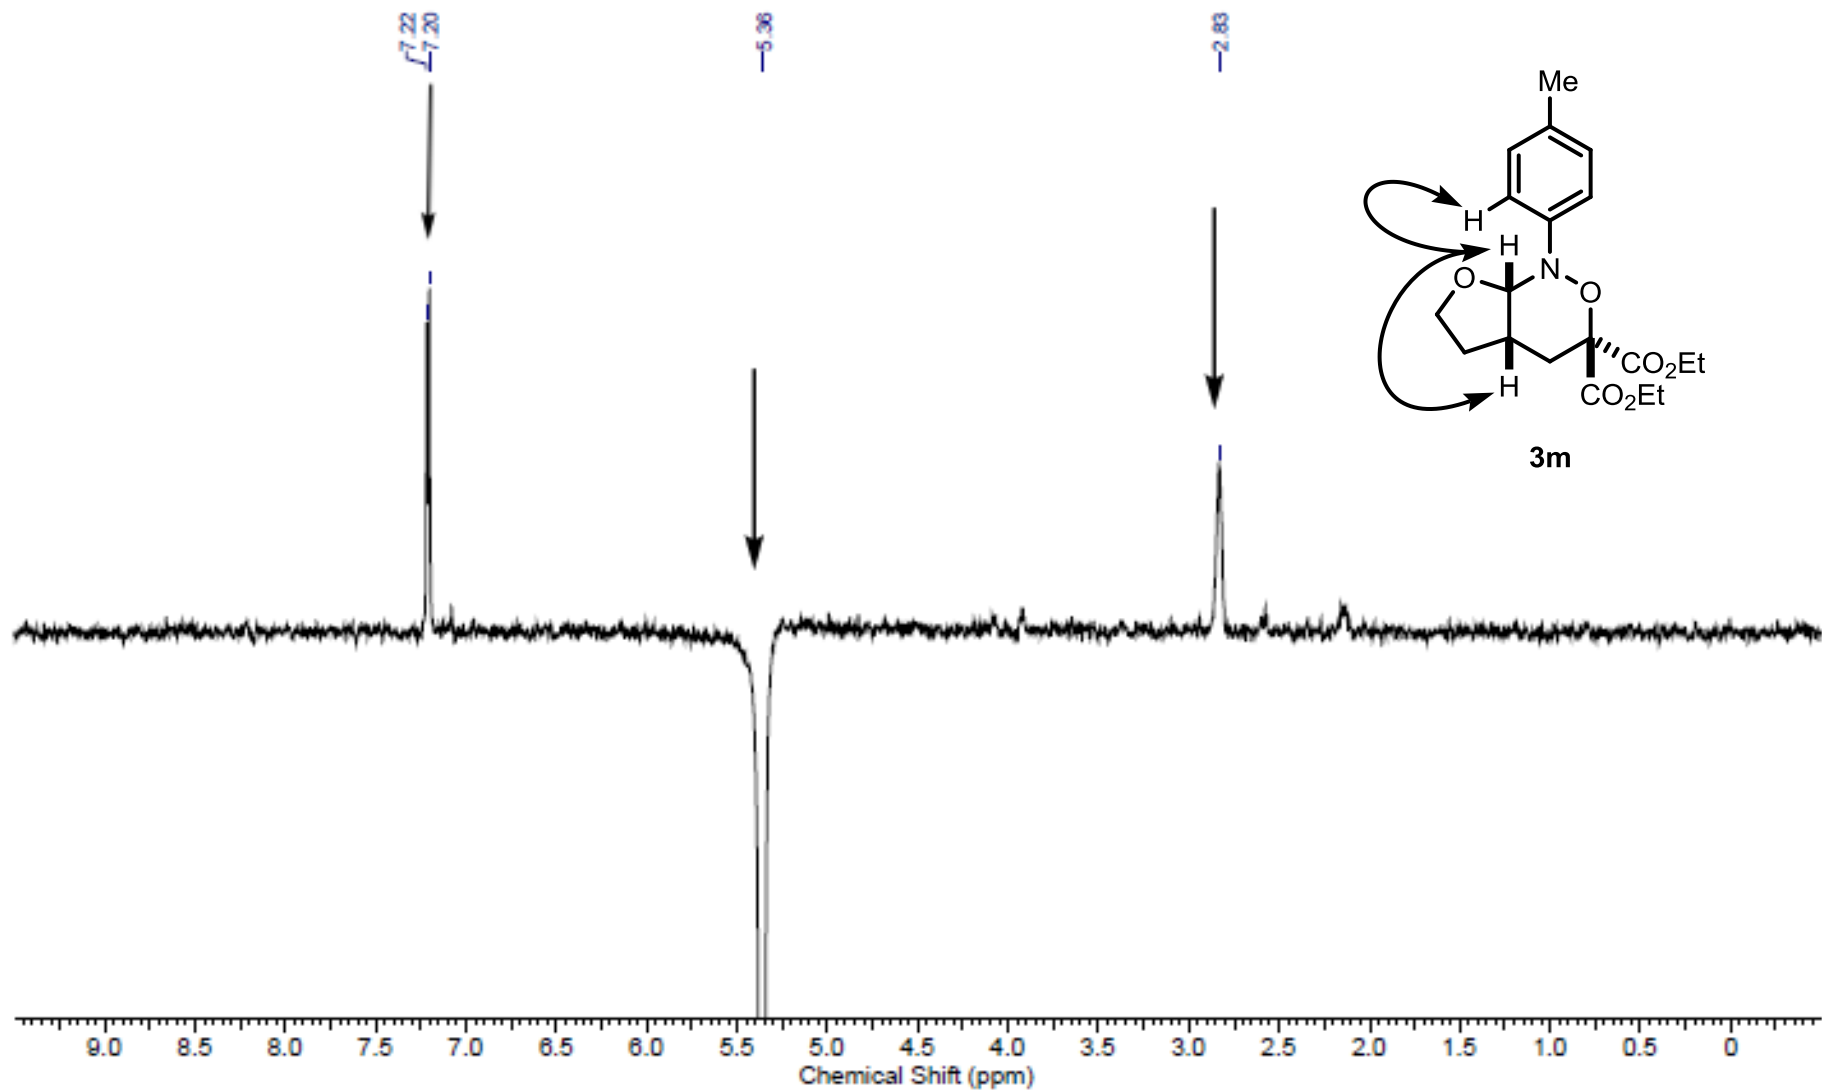

Supplement: c3cc47775d.pdf [file c3cc47775d.pdf]
